# Supplementary material for: ConFindr: rapid detection of intraspecies and cross-species contamination in bacterial whole-genome sequence data
Source: PubMed Central journal article supplement (PMC6546082; doi:10.7717/peerj.6995), 2019-05-31
Supplement: peerj-07-6995-s001.pdf [file peerj-07-6995-s001.pdf]

### Escherichia

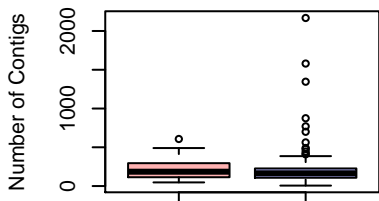

### Salmonella

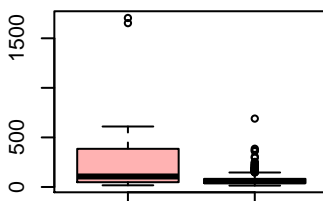

### Listeria

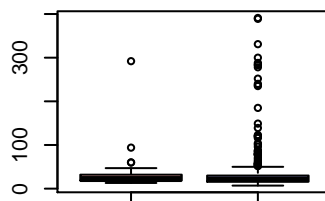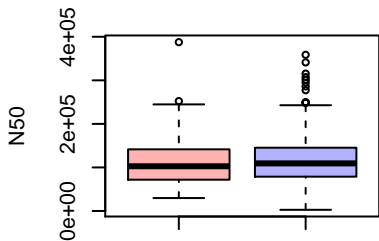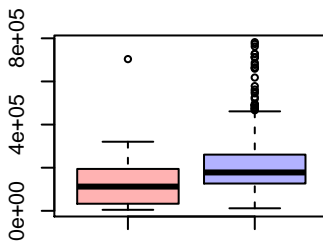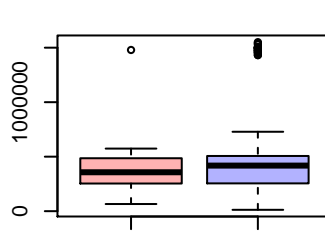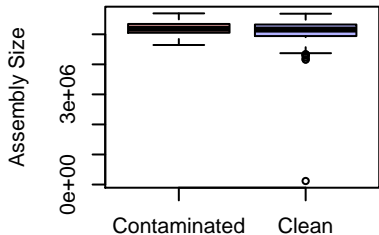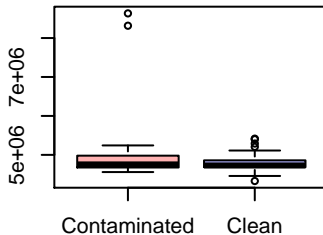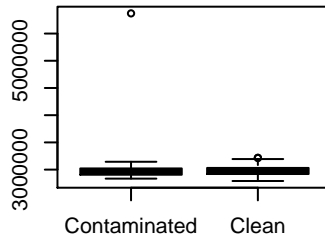

Contaminated  
Clean
