# Supplementary material for: ConFindr: rapid detection of intraspecies and cross-species contamination in bacterial whole-genome sequence data
Source: PeerJ. 2019 May 31;7:e6995. doi: 10.7717/peerj.6995 (PMC6546082; doi:10.7717/peerj.6995)
Supplement: Supplemental Information 1 [file peerj-07-6995-s002.xlsx]

## Sheet: Table S1 ConFindr Test Dataset
SRA Accession	Base Genome	Contaminant Genome	ANI	Contamination Percentage	Synthetic/Real	CoverageDepth	NumContigs	N50	AssemblySize	ConFindrGenus	ConFindrContamSNVs	ConFindrCall
SRR8268081	Escherichia coli O121:H19 (OLF17053-3)	Enterobacter cancerogenus (OLC1687)	78.86	0	Synthetic	75.5965	196	5150254	134602	Escherichia	1	FALSE
SRR8268079	Escherichia coli O121:H19 (OLF17053-3)	Enterobacter cancerogenus (OLC1687)	78.86	10	Synthetic	62.6747	452	5836634	115577	Escherichia	469	TRUE
SRR8268082	Escherichia coli O121:H19 (OLF17053-3)	Enterobacter cancerogenus (OLC1687)	78.86	20	Synthetic	39.8308	644	9797755	38450	Escherichia	644	TRUE
SRR8268080	Escherichia coli O121:H19 (OLF17053-3)	Enterobacter cancerogenus (OLC1687)	78.86	5	Synthetic	72.1373	237	5192063	134602	Escherichia	252	TRUE
SRR8268078	Salmonella enterica Heidelberg (OLC2542)	Salmonella enterica Dublin (OLF18064-1)	98.82	20	Synthetic	67.7796	517	5486637	48702	Salmonella	28	TRUE
SRR8268077	Salmonella enterica Heidelberg (OLC2542)	Salmonella enterica Dublin (OLF18064-1)	98.82	0	Synthetic	78.3952	28	4856718	381348	Salmonella	1	FALSE
SRR8268076	Salmonella enterica Heidelberg (OLC2542)	Salmonella enterica Dublin (OLF18064-1)	98.82	5	Synthetic	77.4862	56	4881296	387491	Salmonella	6	TRUE
SRR8268075	Salmonella enterica Heidelberg (OLC2542)	Salmonella enterica Dublin (OLF18064-1)	98.82	10	Synthetic	75.1265	132	5022778	272678	Salmonella	20	TRUE
SRR8268074	Escherichia coli O121:H19 (OLF17053-3)	Escherichia coli O121:H19 (OLC1252)	99.98	5	Synthetic	74.8054	234	5183143	122561	Escherichia	1	FALSE
SRR8268073	Escherichia coli O121:H19 (OLF17053-3)	Escherichia coli O121:H19 (OLC1252)	99.98	10	Synthetic	72.0413	433	5337747	50560	Escherichia	0	FALSE
SRR8268072	Escherichia coli O121:H19 (OLF17053-3)	Escherichia coli O8:H28 (OLF17043)	98.83	20	Real	45.5422	2298	4178	5973113	Escherichia	11	TRUE
SRR8268071	Escherichia coli O121:H19 (OLF17053-3)	Escherichia coli O8:H28 (OLF17043)	98.83	10	Real	57.8707	518	29903	5372567	Escherichia	10	TRUE
SRR8268070	Escherichia coli O121:H19 (OLF17053-3)	Escherichia coli O8:H28 (OLF17043)	98.83	5	Real	65.317	287	71693	5175580	Escherichia	8	TRUE
SRR8268069	Escherichia coli O121:H19 (OLF17053-3)	Escherichia coli O15:H14 (OLF17030)	98.78	20	Real	45.4224	3260	2549	6137373	Escherichia	13	TRUE
SRR8268068	Salmonella enterica Heidelberg (OLC2542)	Salmonella enterica Bredeney (OLC2229)	98.36	10	Real	44.1594	3687	2112	6402600	Salmonella	31	TRUE
SRR8268067	Salmonella enterica Heidelberg (OLC2542)	Salmonella enterica Bredeney (OLC2229)	98.36	5	Real	28.4411	1742	4230	4812263	Salmonella	22	TRUE
SRR8268066	Salmonella enterica Heidelberg (OLC2542)	Salmonella enterica Heidelberg (OLC2000)	99.99	20	Real	95.9784	68	155269	4854439	Salmonella	1	FALSE
SRR8268065	Escherichia coli O121:H19 (OLF17053-3)	Enterobacter cancerogenus (OLC1687)	78.86	5	Real	60.913	278	94889	5226501	Escherichia	443	TRUE
SRR8268064	Salmonella enterica Heidelberg (OLC2542)	Salmonella enterica Typhimurium (OLF13104-17)	99.08	5	Real	62.2493	135	94931	4913980	Salmonella	9	TRUE
SRR8268063	Salmonella enterica Heidelberg (OLC2542)	Salmonella enterica Bredeney (OLC2229)	98.36	20	Real	40.7376	3570	2211	6278502	Salmonella	32	TRUE
SRR8268062	Escherichia coli O121:H19 (OLF17053-3)	Escherichia coli O15:H14 (OLF17030)	98.78	5	Real	68.414	371	60786	5330506	Escherichia	10	TRUE
SRR8268060	Escherichia coli O121:H19 (OLF17053-3)	Escherichia coli O121:H19 (OLC1252)	99.99	20	Real	78.8498	279	58969	5141311	Escherichia	0	FALSE
SRR8268061	Escherichia coli O121:H19 (OLF17053-3)	Escherichia coli O15:H14 (OLF17030)	98.78	10	Real	55.0064	1616	7291	5916990	Escherichia	10	TRUE
SRR8268059	Escherichia coli O121:H19 (OLF17053-3)	Escherichia coli O174:H19 (OLF17021-7)	98.86	5	Real	76.8575	213	116112	5197993	Escherichia	10	TRUE
SRR8268058	Escherichia coli O121:H19 (OLF17053-3)	Escherichia coli O174:H19 (OLF17021-7)	98.86	10	Real	81.6747	282	79129	5243106	Escherichia	9	TRUE
SRR8268057	Escherichia coli O121:H19 (OLF17053-3)	Escherichia coli O174:H19 (OLF17021-7)	98.86	20	Real	73.8394	1016	12321	5528081	Escherichia	14	TRUE
SRR8268056	Escherichia coli O121:H19 (OLF17053-3)	Escherichia coli O15:H14 (OLF17030)	98.78	5	Synthetic	74.7554	230	5179176	121490	Escherichia	4	TRUE
SRR8268053	Escherichia coli O121:H19 (OLF17053-3)	Escherichia coli O15:H14 (OLF17030)	98.78	0	Synthetic	75.5402	197	5151963	125357	Escherichia	0	FALSE
SRR8268054	Escherichia coli O121:H19 (OLF17053-3)	Escherichia coli O15:H14 (OLF17030)	98.78	20	Synthetic	60.9784	1930	6029910	5773	Escherichia	10	TRUE
SRR8268052	Listeria monocytogenes (OLF10129)	Listeria innocua (OLC0004)	88.26	0	Synthetic	80.3442	16	2966921	320971	Listeria	0	FALSE
SRR8268051	Listeria monocytogenes (OLF10129)	Listeria innocua (OLC0004)	88.26	20	Synthetic	50.8713	1070	4557515	48702	Listeria	246	TRUE
SRR8268050	Listeria monocytogenes (OLF10129)	Listeria monocytogenes (OLF13043-2)	99.54	0	Synthetic	80.3774	16	2966951	307172	Listeria	0	FALSE
SRR8268049	Listeria monocytogenes (OLF10129)	Listeria monocytogenes (OLF13043-2)	99.54	20	Synthetic	73.7655	511	3114044	11061	Listeria	13	TRUE
SRR8268048	Listeria monocytogenes (OLF10129)	Listeria monocytogenes (OLF09168)	94.85	10	Synthetic	68.9988	453	3333771	271165	Listeria	92	TRUE
SRR8268047	Listeria monocytogenes (OLF10129)	Listeria monocytogenes (OLF09168)	94.85	5	Synthetic	78.765	57	2992774	320971	Listeria	44	TRUE
SRR8268046	Listeria monocytogenes (OLF10129)	Listeria monocytogenes (OLF09168)	94.85	0	Synthetic	80.3442	16	2966921	320971	Listeria	0	FALSE
SRR8268044	Listeria monocytogenes (OLF10129)	Listeria innocua (OLC0004)	88.26	10	Synthetic	70.1038	273	3294378	306648	Listeria	193	TRUE
SRR8268045	Listeria monocytogenes (OLF10129)	Listeria monocytogenes (OLF09168)	94.85	20	Synthetic	50.8713	1070	4557515	48702	Listeria	125	TRUE
SRR8268043	Listeria monocytogenes (OLF10129)	Listeria innocua (OLC0004)	88.26	5	Synthetic	76.0503	94	3086105	291369	Listeria	113	TRUE
SRR8268041	Listeria monocytogenes (OLF10129)	Listeria monocytogenes (OLF15140)	99.45	5	Real	88.276	70	106874	2994368	Listeria	6	TRUE
SRR8268042	Listeria monocytogenes (OLF10129)	Listeria monocytogenes (OLF15140)	99.45	10	Real	144.137	44	238382	3036500	Listeria	7	TRUE
SRR8268040	Listeria monocytogenes (OLF10129)	Listeria monocytogenes (OLF09168)	94.85	5	Real	115.932	101	280250	3024378	Listeria	58	TRUE
SRR8268039	Listeria monocytogenes (OLF10129)	Listeria monocytogenes (OLF15140)	99.45	20	Real	102.562	351	19350	3199956	Listeria	9	TRUE
SRR8268038	Listeria monocytogenes (OLF10129)	Listeria monocytogenes (OLF09168)	94.85	20	Real	53.7265	1438	8166	5169292	Listeria	125	TRUE
SRR8268037	Listeria monocytogenes (OLF10129)	Listeria monocytogenes (OLF09168)	94.85	10	Real	76.7752	829	82123	3706996	Listeria	113	TRUE
SRR8268036	Listeria monocytogenes (OLF10129)	Listeria innocua (OLC0004)	88.26	10	Real	105.75	156	213615	3158084	Listeria	123	TRUE
SRR8268035	Listeria monocytogenes (OLF10129)	Listeria innocua (OLC0004)	88.26	5	Real	112.43	51	223090	3048891	Listeria	40	TRUE
SRR8268034	Listeria monocytogenes (OLF10129)	Enterococcus faecalis (OLC0147)	66.38	5	Real	149.8	43	223090	2999885	Listeria:Enterococcus	0	TRUE
SRR8268033	Salmonella enterica Heidelberg (OLC2542)	Salmonella enterica Dublin (OLF18064-1)	98.82	5	Real	71.5449	117	118377	4904268	Salmonella	20	TRUE
SRR8268032	Salmonella enterica Heidelberg (OLC2542)	Salmonella enterica Dublin (OLF18064-1)	98.82	10	Real	69.4634	593	21329	5303117	Salmonella	28	TRUE
SRR8268031	Salmonella enterica Heidelberg (OLC2542)	Salmonella enterica Typhimurium (OLF13104-17)	99.08	10	Real	80.6544	180	85561	5103997	Salmonella	16	TRUE
SRR8268030	Salmonella enterica Heidelberg (OLC2542)	Salmonella enterica Typhimurium (OLF13104-17)	99.08	20	Real	79.4827	1308	10018	5570542	Salmonella	22	TRUE
SRR8268029	Listeria monocytogenes (OLF10129)	Listeria monocytogenes (OLF11041-1)	99.99	20	Real	101.759	25	223090	2967190	Listeria	1	FALSE
SRR8268028	Listeria monocytogenes (OLF10129)	Listeria monocytogenes (OLF13043-2)	99.54	5	Real	88.276	70	106874	2994368	Listeria	5	TRUE
SRR8268027	Salmonella enterica Heidelberg (OLC2542)	Salmonella enterica Dublin (OLF18064-1)	98.82	20	Real	39.7207	3194	2185	5422512	Salmonella	32	TRUE
SRR8268026	Salmonella enterica Heidelberg (OLC2542)	Citrobacter freundii (OLC1136)	81.83	5	Real	42.3773	278	71956	9821432	Salmonella	565	TRUE
SRR8268025	Listeria monocytogenes (OLF10129)	Listeria monocytogenes (OLF13043-2)	99.54	10	Real	144.137	44	238382	3036500	Listeria	14	TRUE
SRR8268024	Listeria monocytogenes (OLF10129)	Listeria monocytogenes (OLF13043-2)	99.54	20	Real	102.562	351	19350	3199956	Listeria	13	TRUE
SRR8268023	Listeria monocytogenes (OLF10129)	Listeria monocytogenes (OLF11041-1)	99.99	10	Synthetic	80.378	18	2966349	271162	Listeria	0	FALSE
SRR8268022	Listeria monocytogenes (OLF10129)	Listeria monocytogenes (OLF11041-1)	99.99	5	Synthetic	80.2958	16	2966006	338684	Listeria	1	FALSE
SRR8268021	Listeria monocytogenes (OLF10129)	Listeria monocytogenes (OLF11041-1)	99.99	0	Synthetic	80.3693	17	2966621	320794	Listeria	1	FALSE
SRR8268020	Listeria monocytogenes (OLF10129)	Listeria monocytogenes (OLF11041-1)	99.99	20	Synthetic	80.399	25	2966313	209383	Listeria	1	FALSE
SRR8268019	Listeria monocytogenes (OLF10129)	Listeria monocytogenes (OLF15140)	99.45	10	Synthetic	76.8444	83	3073200	112978	Listeria	5	TRUE
SRR8268018	Listeria monocytogenes (OLF10129)	Listeria monocytogenes (OLF15140)	99.45	5	Synthetic	78.7187	47	3007464	291474	Listeria	2	FALSE
SRR8268017	Listeria monocytogenes (OLF10129)	Listeria monocytogenes (OLF15140)	99.45	0	Synthetic	80.2608	17	2966397	324572	Listeria	1	FALSE
SRR8268016	Listeria monocytogenes (OLF10129)	Listeria monocytogenes (OLF15140)	99.45	20	Synthetic	70.6166	496	3271976	13869	Listeria	11	TRUE
SRR8268014	Listeria monocytogenes (OLF10129)	Listeria monocytogenes (OLF13043-2)	99.54	5	Synthetic	79.9885	26	2971529	302686	Listeria	8	TRUE
SRR8268015	Listeria monocytogenes (OLF10129)	Listeria monocytogenes (OLF13043-2)	99.54	10	Synthetic	78.6513	78	3008481	134503	Listeria	3	TRUE
SRR8268013	Salmonella enterica Heidelberg (OLC2542)	Salmonella enterica Typhimurium (OLF13104-17)	99.08	10	Synthetic	74.2311	162	5080654	162612	Salmonella	9	TRUE
SRR8268012	Salmonella enterica Heidelberg (OLC2542)	Salmonella enterica Typhimurium (OLF13104-17)	99.08	5	Synthetic	77.1366	66	4910684	235407	Salmonella	6	TRUE
SRR8268011	Salmonella enterica Heidelberg (OLC2542)	Salmonella enterica Bredeney (OLC2229)	98.36	0	Synthetic	78.4165	28	4856495	381281	Salmonella	1	FALSE
SRR8268010	Salmonella enterica Heidelberg (OLC2542)	Salmonella enterica Bredeney (OLC2229)	98.36	20	Synthetic	62.0196	1114	5876965	23522	Salmonella	29	TRUE
SRR8268008	Salmonella enterica Heidelberg (OLC2542)	Salmonella enterica Bredeney (OLC2229)	98.36	5	Synthetic	77.9595	34	4859111	381278	Salmonella	8	TRUE
SRR8268009	Salmonella enterica Heidelberg (OLC2542)	Salmonella enterica Bredeney (OLC2229)	98.36	10	Synthetic	76.2556	111	4936326	228154	Salmonella	23	TRUE
SRR8268007	Salmonella enterica Heidelberg (OLC2542)	Salmonella enterica Heidelberg (OLC2000)	99.99	0	Synthetic	78.3854	26	4856433	464683	Salmonella	1	FALSE
SRR8268006	Salmonella enterica Heidelberg (OLC2542)	Salmonella enterica Heidelberg (OLC2000)	99.99	20	Synthetic	78.1778	42	4857895	225237	Salmonella	0	FALSE
SRR8268005	Salmonella enterica Heidelberg (OLC2542)	Salmonella enterica Typhimurium (OLF13104-17)	99.08	0	Synthetic	78.4084	28	4856473	381295	Salmonella	1	FALSE
SRR8268004	Salmonella enterica Heidelberg (OLC2542)	Salmonella enterica Typhimurium (OLF13104-17)	99.08	20	Synthetic	65.537	898	5599137	19777	Salmonella	18	TRUE
SRR8268003	Listeria monocytogenes (OLF10129)	Enterococcus faecalis (OLC0147)	66.38	5	Synthetic	74.9706	75	3026749	271165	Listeria:Enterococcus	0	TRUE
SRR8268002	Listeria monocytogenes (OLF10129)	Enterococcus faecalis (OLC0147)	66.38	10	Synthetic	66.8999	153	3274326	302686	Listeria:Enterococcus	0	TRUE
SRR8268001	Listeria monocytogenes (OLF10129)	Enterococcus faecalis (OLC0147)	66.38	20	Synthetic	42.0622	795	5601212	83021	Listeria:Enterococcus	0	TRUE
SRR8268000	Listeria monocytogenes (OLF10129)	Enterococcus faecalis (OLC0147)	66.38	0	Synthetic	80.2911	14	2966466	338684	Listeria	0	FALSE
SRR8267999	Salmonella enterica Heidelberg (OLC2542)	Citrobacter freundii (OLC1136)	81.83	5	Synthetic	75.0231	76	4899754	438960	Salmonella	155	TRUE
SRR8267998	Salmonella enterica Heidelberg (OLC2542)	Citrobacter freundii (OLC1136)	81.83	10	Synthetic	66.3531	359	5391831	297118	Salmonella	320	TRUE
SRR8267997	Salmonella enterica Heidelberg (OLC2542)	Citrobacter freundii (OLC1136)	81.83	20	Synthetic	38.8195	829	9718561	37126	Salmonella	478	TRUE
SRR8267996	Salmonella enterica Heidelberg (OLC2542)	Citrobacter freundii (OLC1136)	81.83	0	Synthetic	78.4496	29	4856249	693768	Salmonella	1	FALSE
SRR8267995	Salmonella enterica Heidelberg (OLC2542)	Salmonella enterica Heidelberg (OLC2000)	99.99	5	Synthetic	78.3037	30	4858276	295194	Salmonella	0	FALSE
SRR8267994	Salmonella enterica Heidelberg (OLC2542)	Salmonella enterica Heidelberg (OLC2000)	99.99	10	Synthetic	78.2739	31	4858241	381325	Salmonella	1	FALSE
SRR8267993	Escherichia coli O121:H19 (OLF17053-3)	Escherichia coli O8:H28 (OLF17043)	98.83	0	Synthetic	75.5918	198	5150857	122438	Escherichia	1	FALSE
SRR8267992	Escherichia coli O121:H19 (OLF17053-3)	Escherichia coli O8:H28 (OLF17043)	98.83	20	Synthetic	59.9977	2169	6044650	4573	Escherichia	11	TRUE
SRR8267990	Escherichia coli O121:H19 (OLF17053-3)	Escherichia coli O174:H19 (OLF17021-7)	98.86	5	Synthetic	74.8054	234	5183143	122561	Escherichia	3	TRUE
SRR8267989	Escherichia coli O121:H19 (OLF17053-3)	Escherichia coli O121:H19 (OLC1252)	99.98	0	Synthetic	75.5918	198	5150857	122438	Escherichia	0	FALSE
SRR8267987	Escherichia coli O121:H19 (OLF17053-3)	Escherichia coli O8:H28 (OLF17043)	98.83	10	Synthetic	72.0138	477	5329336	31707	Escherichia	5	TRUE
SRR8267988	Escherichia coli O121:H19 (OLF17053-3)	Escherichia coli O121:H19 (OLC1252)	99.98	20	Synthetic	75.4287	209	5160560	115467	Escherichia	1	FALSE
SRR8267991	Escherichia coli O121:H19 (OLF17053-3)	Escherichia coli O174:H19 (OLF17021-7)	98.86	10	Synthetic	72.0413	433	5337747	50560	Escherichia	5	TRUE
SRR8267986	Escherichia coli O121:H19 (OLF17053-3)	Escherichia coli O8:H28 (OLF17043)	98.83	5	Synthetic	75.2584	197	5154985	119304	Escherichia	7	TRUE
SRR8267985	Escherichia coli O121:H19 (OLF17053-3)	Escherichia coli O174:H19 (OLF17021-7)	98.86	0	Synthetic	75.6834	189	5148940	146142	Escherichia	0	FALSE
SRR8267984	Escherichia coli O121:H19 (OLF17053-3)	Escherichia coli O174:H19 (OLF17021-7)	98.86	20	Synthetic	63.6055	1660	5811621	6648	Escherichia	11	TRUE
SRR8268055	Escherichia coli O121:H19 (OLF17053-3)	Escherichia coli O15:H14 (OLF17030)	98.78	10	Synthetic	70.9992	509	5385110	32121	Escherichia	8	TRUE

## Sheet: Table S2 Commands
Purpose	Command
Quality Trim Kraken	bbduk.sh in=forward_reads.fastq.gz in2=reverse_reads.fastq.gz out=trimmed_R1.fastq.gz out2=trimmed_R2.fastq.gz ref=adapters trimq=15 qtrim=w
Quality Trim Assembly	bbduk.sh in=forward_reads.fastq.gz in2=reverse_reads.fastq.gz out=trimmed_R1.fastq.gz out2=trimmed_R2.fastq.gz ref=adapters trimq=10 qtrim=w
Error Correct Reads Assembly	tadpole.sh in=trimmed_R1.fastq.gz in2=trimmed_R2.fastq.gz out=trimmed_corrected_R1.fastq.gz out2=trimmed_corrected_R2.fastq.gz mode=correct
De Novo Assembly	skesa --fastq trimmed_corrected_R1.fastq.gz,trimmed_corrected_R2.fastq.gz --vector_percent 1 -- contigs_out output_name.fasta ​
ART MiSeq Simulation	art_illumina -ss MSv1 -i fasta_file -l 250 -na -p -f coverage -m 350 -s 10 -o output_name
ART HiSeq Simulation	art_illumina -ss HS25 -i fasta_file -l 150 -na -p -f coverage -m 225 -s 10 -o output_name

## Sheet: Table S3 rMLST SNVs in silico d
Species	100 SNV	500 SNV	1000 SNV	2000 SNV
L. monocytogenes	1	2	7	16
S. enterica	1	5	4	5
E. coli	1	0	2	7

## Sheet: Table S4 SRA ConFindr Results
Sample	Genus	NumContamSNVs	ContamStatus	PercentContam	PercentContamStandardDeviation	BasesExamined	Biosample	N50	NumContigs	AssemblySize	CoverageDepth
DRR021791	Escherichia	0	0	0	0	20862	SAMD00019030	8764	770	4330721	21.6568
DRR057909	Escherichia	0	0	0	0	20862	SAMD00049288	133833	177	5327012	77.5298
DRR075633	Escherichia	0	0	0	0	20862	SAMD00062413	133416	118	5106773	97.026
DRR077351	Escherichia	2	0	0	0	20862	SAMD00067414	128720	176	5221438	100.129
DRR092869	Escherichia	0	0	0	0	20862	SAMD00080507	192746	94	5183005	73.1286
DRR096295	Escherichia	0	0	0	0	20862	SAMD00083801	145290	193	5306144	76.2067
DRR096349	Escherichia	0	0	0	0	20862	SAMD00083855	133203	184	5318407	67.793
DRR096413	Escherichia	6	1	9.22	7.07	20862	SAMD00049291	127309	171	5289645	56.9568
DRR102558	Escherichia	0	0	0	0	20862	SAMD00076966	106759	100	5160353	89.1247
DRR102584	Escherichia	0	0	0	0	20862	SAMD00076992	86046	175	4998444	46.8935
DRR102598	Escherichia	0	0	0	0	20862	SAMD00077006	307358	99	5122650	72.1619
DRR102622	Escherichia	0	0	0	0	20862	SAMD00077030	120674	150	5062360	82.2385
DRR102645	Escherichia	2	0	0	0	20862	SAMD00077053	110868	118	4926948	87.4737
DRR102663	Escherichia	0	0	0	0	20862	SAMD00077071	80909	141	5161692	90.7319
DRR102860	Escherichia	1	0	0	0	20862	SAMD00077268	85423	145	4948672	104.351
DRR103017	Escherichia	0	0	0	0	20862	SAMD00077425	87528	169	4878963	61.3235
DRR103034	Escherichia	0	0	0	0	20862	SAMD00077442	217273	96	4966362	76.0357
DRR103121	Escherichia	1	0	0	0	20862	SAMD00077529	61420	247	5122124	96.4022
DRR103181	Escherichia	2	0	0	0	20862	SAMD00077589	81272	193	5165613	75.7864
DRR103209	Escherichia	0	0	0	0	20862	SAMD00077617	44930	236	4598462	97.9139
DRR103230	Escherichia	2	0	0	0	20862	SAMD00077638	58618	227	4974073	66.5981
DRR103273	Escherichia	1	0	0	0	20862	SAMD00077681	80680	163	4812027	108.244
DRR103498	Escherichia	0	0	0	0	20862	SAMD00075841	81807	260	5272796	178.624
DRR103584	Escherichia	1	0	0	0	20862	SAMD00075927	80556	302	5335173	114.404
DRR103675	Escherichia	0	0	0	0	20862	SAMD00076018	91833	317	5411500	126.444
DRR111593	Escherichia	10	1	7.71	2.58	20862	SAMD00099780	141603	107	4910620	229.736
DRR111599	Escherichia	3	1	6.6	1.1	20862	SAMD00099786	169317	150	5215401	207.866
DRR147079	Escherichia	0	0	0	0	20862	SAMD00133818	122903	174	5329448	66.75
DRR148252	Escherichia	0	0	0	0	20862	SAMD00126489	91446	132	5030154	95.142
DRR148265	Escherichia	0	0	0	0	20862	SAMD00126502	173686	85	5035464	107.703
DRR148288	Escherichia	0	0	0	0	20862	SAMD00126525	130238	112	5199163	104.903
DRR148325	Escherichia	1	0	0	0	20862	SAMD00126562	196852	89	5093075	51.5751
DRR148354	Escherichia	1	0	0	0	20862	SAMD00126591	201561	113	5202213	83.8669
ERR1100928	Listeria	0	0	0	0	20517	SAMEA3540846	430187	17	2919564	879.639
ERR1100940	Listeria	0	0	0	0	20517	SAMEA3540838	228129	35	2916410	623.494
ERR1100941	Listeria:Mycobacterium	0	1	NA	NA	0	SAMEA3540843	236193	30	2931123	531.425
ERR1100946	Listeria	0	0	0	0	20517	SAMEA3540859	331232	29	2972285	552.363
ERR1102126	Listeria	0	0	0	0	20517	SAMEA3639325	188592	37	2916114	62.1172
ERR1102129	Listeria	0	0	0	0	20517	SAMEA3639328	53339	119	2983356	45.5799
ERR1102164	Listeria	0	0	0	0	20517	SAMEA3639363	108837	58	3061508	71.1511
ERR1102199	Listeria	0	0	0	0	20517	SAMEA3639398	18991	284	2908321	82.3153
ERR1102214	Listeria	2	0	0	0	20517	SAMEA3639413	300437	30	3086178	59.825
ERR1102250	Listeria	0	0	0	0	20517	SAMEA3639449	12654	389	2850826	36.0414
ERR1102267	Listeria	0	0	0	0	20517	SAMEA3639466	51923	123	3055532	46.1873
ERR1102304	Listeria	3	1	8.62	4.04	20517	SAMEA3639503	296157	13	2914875	76.3068
ERR1102325	Listeria	3	1	5.81	0.77	20517	SAMEA3639524	65641	94	2983791	74.2495
ERR1102358	Listeria	0	0	0	0	20517	SAMEA3639557	41509	121	2900910	49.8249
ERR1102396	Listeria	0	0	0	0	20517	SAMEA3639595	557689	9	2951256	85.7554
ERR1102421	Listeria	1	0	0	0	20517	SAMEA3639620	165765	56	3122887	66.9958
ERR1102465	Listeria	2	0	0	0	20517	SAMEA3639664	212135	31	3060098	72.2324
ERR1102505	Listeria	0	0	0	0	20517	SAMEA3639704	21312	278	2860812	95.4235
ERR1102530	Listeria	1	0	0	0	20517	SAMEA3639729	235453	35	3063566	112.929
ERR1102534	Listeria	1	0	0	0	20517	SAMEA3639733	90165	79	2909520	56.0525
ERR1102613	Listeria	1	0	0	0	20517	SAMEA3639812	149842	39	3098026	100.52
ERR1230362	Listeria	0	0	0	0	20517	SAMEA3857802	150232	46	2962672	49.8213
ERR1230383	Listeria	1	0	0	0	20517	SAMEA3857823	476852	12	2873013	109.183
ERR1230453	Listeria	0	0	0	0	20517	SAMEA3857893	406653	26	3035283	81.5603
ERR1304250	Listeria	2	0	0	0	20517	SAMEA3861768	209569	23	2921224	35.6999
ERR1431120	Listeria	0	0	0	0	20517	SAMEA3709848	543670	12	2905784	290.478
ERR1432961	Listeria	0	0	0	0	20517	SAMEA4019593	319167	31	3084391	62.2775
ERR1432972	Listeria	0	0	0	0	20517	SAMEA4019604	1466168	15	2917932	46.1061
ERR1432983	Listeria	0	0	0	0	20517	SAMEA4019615	481638	29	3086868	94.0116
ERR1433015	Listeria	0	0	0	0	20517	SAMEA4019647	358986	19	3005026	51.4283
ERR1512450	Escherichia	0	0	0	0	20862	SAMEA4058422	109854	114	5111542	76.6962
ERR1512520	Escherichia	0	0	0	0	20862	SAMEA4058492	248549	71	5131945	93.7243
ERR1599679	Listeria	0	0	0	0	20517	SAMEA4398455	368102	27	3003285	328.911
ERR1599703	Listeria	0	0	0	0	20517	SAMEA4398479	244727	28	2957125	247.579
ERR1599764	Listeria	0	0	0	0	20517	SAMEA4398540	197078	37	2917315	53.9867
ERR1599776	Listeria	0	0	0	0	20517	SAMEA4398552	482541	19	3017033	131.941
ERR1599802	Listeria	0	0	0	0	20517	SAMEA4398578	237047	33	2902069	55.7077
ERR1599845	Listeria	0	0	0	0	20517	SAMEA4398621	300077	12	2918883	80.7464
ERR1599847	Listeria	0	0	0	0	20517	SAMEA4398623	300077	12	2919300	91.596
ERR1599867	Listeria	0	0	0	0	20520	SAMEA4398643	346292	26	2933376	67.2159
ERR1600125	Listeria	1	0	0	0	20517	SAMEA4412871	450021	17	2922827	93.0921
ERR1738664	Listeria	0	0	0	0	20517	SAMEA4475762	359331	20	2958782	51.6083
ERR1738665	Listeria	0	0	0	0	20517	SAMEA4475763	170336	37	2890341	75.9574
ERR1738688	Listeria	0	0	0	0	20517	SAMEA4475788	594449	10	2963070	83.3109
ERR1738727	Listeria	0	0	0	0	20517	SAMEA4475827	476210	27	3034493	103.319
ERR1738731	Listeria	0	0	0	0	20517	SAMEA4475833	475773	31	2961936	78.1618
ERR1738760	Listeria	0	0	0	0	20517	SAMEA4475882	348693	23	3012060	57.0208
ERR1738782	Listeria	0	0	0	0	20517	SAMEA4475905	479798	21	3052553	58.5671
ERR1738822	Listeria	0	0	0	0	20517	SAMEA4475945	583327	16	2996783	71.7664
ERR1745314	Escherichia	0	0	0	0	20862	SAMEA18826168	85351	112	4593562	41.1527
ERR1745395	Escherichia	0	0	0	0	20862	SAMEA18886918	949	2290	2096395	7.43789
ERR1748399	Escherichia	0	0	0	0	20862	SAMEA20022418	23221	382	4481243	25.9745
ERR1748427	Escherichia	0	0	0	0	20931	SAMEA20043418	907	1618	1449599	6.03747
ERR1755553	Escherichia	0	0	0	0	20862	SAMEA26142418	170795	87	5163128	42.3524
ERR1755554	Escherichia	2	0	0	0	20862	SAMEA26143168	148979	87	4904978	44.9957
ERR1816994	Listeria	0	0	0	0	20517	SAMEA72809668	540804	18	3007366	99.8545
ERR1816997	Listeria	0	0	0	0	20517	SAMEA72813418	585468	14	3111731	105.867
ERR1817002	Listeria	0	0	0	0	20517	SAMEA72818668	541087	18	2954506	102.426
ERR1817006	Listeria	0	0	0	0	20517	SAMEA72821668	474842	26	3170423	74.259
ERR1822289	Escherichia	1	0	0	0	20862	SAMEA4469923	215932	76	5112532	63.0537
ERR1822566	Escherichia	0	0	0	0	20862	SAMEA4470202	233307	70	4965015	59.7267
ERR1878247	Escherichia	0	0	0	0	20862	SAMEA4370289	140431	160	5256971	59.5896
ERR1878276	Escherichia	0	0	0	0	20862	SAMEA4370318	80644	192	5239338	61.7805
ERR1878288	Escherichia	0	0	0	0	20862	SAMEA4370330	203582	115	5229774	78.8855
ERR1878320	Escherichia	1	0	0	0	20862	SAMEA4370362	154432	92	5068868	56.6278
ERR1878334	Escherichia	0	0	0	0	20862	SAMEA4370377	121642	107	5163547	54.8007
ERR1891164	Escherichia	0	0	0	0	20862	SAMEA4547756	205682	106	5283049	55.2383
ERR1891548	Escherichia	0	0	0	0	20931	SAMEA4548029	136453	124	5418386	74.5556
ERR1912626	Escherichia	0	0	0	0	20862	SAMEA103923491	22605	491	5077556	21.2407
ERR1912629	Escherichia	3	1	7.67	0.76	20862	SAMEA103923494	133201	114	5163300	62.3571
ERR1937173	Escherichia	0	0	0	0	20931	SAMEA4552155	358626	61	5207581	50.414
ERR1937237	Escherichia	0	0	0	0	20862	SAMEA4552220	249978	84	5180184	42.5937
ERR1937261	Escherichia	0	0	0	0	20862	SAMEA4560076	156408	97	5053590	72.4482
ERR1937286	Escherichia	0	0	0	0	20862	SAMEA4560101	147083	133	4908921	60.6655
ERR1937365	Escherichia	0	0	0	0	20862	SAMEA4560180	120598	167	5130703	48.0584
ERR1937367	Escherichia	1	0	0	0	20862	SAMEA4560182	80815	166	4770266	60.5818
ERR1937583	Escherichia	0	0	0	0	20862	SAMEA4560398	46380	241	4786187	59.722
ERR1949004	Escherichia	0	0	0	0	20862	SAMEA104027504	85719	136	4846450	20.9504
ERR1949035	Escherichia	0	0	0	0	20862	SAMEA104027535	107199	161	4956263	28.5787
ERR1949111	Escherichia:Salmonella	0	1	NA	NA	0	SAMEA104027611	185284	56	4868409	140.371
ERR1949130	Escherichia	0	0	0	0	20862	SAMEA104027630	105920	115	4862002	91.8736
ERR1971329	Escherichia	0	0	0	0	20862	SAMEA104060849	126299	139	5224007	36.3559
ERR1971494	Escherichia	0	0	0	0	20862	SAMEA104060669	301356	68	5097870	58.1233
ERR1971677	Escherichia	0	0	0	0	20862	SAMEA104060825	171774	107	5369406	59.0125
ERR1971716	Escherichia	0	0	0	0	20862	SAMEA104060698	195246	81	5253554	54.0828
ERR1999751	Escherichia	4	1	6.7	1.1	20862	SAMEA104112356	212185	90	5073124	128.849
ERR2004766	Escherichia	0	0	0	0	20862	SAMEA104121177	190644	63	4854368	235.848
ERR2004771	Escherichia	0	0	0	0	20862	SAMEA104121182	114141	115	4849557	221.82
ERR2004816	Escherichia	0	0	0	0	20862	SAMEA104121227	116891	198	5510679	176.986
ERR2010884	Escherichia	9	1	7.19	1.1	20862	SAMEA104128277	119600	201	4996605	94.6247
ERR2010897	Escherichia	0	0	0	0	20862	SAMEA104128290	120444	179	5010699	104.371
ERR2013716	Escherichia	0	0	0	0	20862	SAMEA104136592	238582	73	4872192	46.9371
ERR2019182	Escherichia	0	0	0	0	20862	SAMEA104142901	147650	93	5138977	123.045
ERR2019195	Escherichia	0	0	0	0	20862	SAMEA104142914	18186	505	5167769	16.9332
ERR2019221	Escherichia	1	0	0	0	20862	SAMEA104142940	154562	79	4940404	111.54
ERR2019226	Escherichia	1	0	0	0	20862	SAMEA104142945	193208	85	4960463	77.8589
ERR2019238	Escherichia	1	0	0	0	20931	SAMEA104142957	133237	126	4944947	92.9081
ERR2019255	Escherichia	0	0	0	0	20862	SAMEA104142974	79892	145	4706638	130.499
ERR2060115	Escherichia	0	0	0	0	20862	SAMEA104188763	183446	95	5094296	58.385
ERR2060125	Escherichia	1	0	0	0	20862	SAMEA104188773	212208	87	5102696	62.0506
ERR2060134	Escherichia	0	0	0	0	20862	SAMEA104188782	204474	82	5221198	66.1767
ERR2091400	Escherichia	0	0	0	0	20862	SAMEA104205992	73906	144	5070284	37.7831
ERR2135213	Escherichia	0	0	0	0	20862	SAMEA104314548	193555	80	4798468	44.8224
ERR2135256	NA	0	0	0	0	21285	SAMEA104314591	38013	290	4899742	80.5714
ERR2135583	Listeria:Arcobacter	0	1	NA	NA	0	SAMEA104314748	543640	12	2866872	1016.86
ERR2135601	Listeria	0	0	0	0	20517	SAMEA104314766	1529922	14	2921245	329.543
ERR2135690	Listeria	1	0	0	0	20517	SAMEA104314855	438502	18	2883959	73.5247
ERR2135695	Listeria	1	0	0	0	20517	SAMEA104314860	476255	11	2873048	105.093
ERR2137909	Escherichia	0	0	0	0	20862	SAMEA4362776	226722	82	5131479	61.8441
ERR2137941	Escherichia	0	0	0	0	20862	SAMEA4362808	191168	89	4974149	48.8266
ERR2137984	Escherichia	0	0	0	0	20862	SAMEA4362852	113661	92	4687122	59.6738
ERR2138074	Escherichia	0	0	0	0	20862	SAMEA4362948	189003	89	4947313	60.3169
ERR2138078	Escherichia	0	0	0	0	20931	SAMEA4362952	161803	103	5217459	53.2632
ERR2138125	Escherichia	1	0	0	0	20862	SAMEA4363000	177119	90	5045767	51.0012
ERR2138149	Escherichia	0	0	0	0	20862	SAMEA4363025	224694	108	5224738	57.9853
ERR2138236	Escherichia	0	0	0	0	20862	SAMEA4363115	154463	75	4910961	66.5786
ERR2138262	Escherichia	0	0	0	0	20862	SAMEA4363142	91645	132	4779334	72.3185
ERR2138273	Escherichia	0	0	0	0	20862	SAMEA4363153	139622	108	4982918	53.6714
ERR2138300	Escherichia	0	0	0	0	20862	SAMEA4363182	121726	152	5016848	68.4298
ERR2138366	Escherichia	0	0	0	0	20862	SAMEA4363250	214024	84	5088061	54.1652
ERR2138425	Escherichia	0	0	0	0	20862	SAMEA4363311	136604	73	5027424	66.9266
ERR2138430	Escherichia	0	0	0	0	20862	SAMEA4363316	75730	156	4946854	61.3875
ERR2138511	Escherichia	0	0	0	0	20862	SAMEA4363407	119821	112	5116998	59.1372
ERR2138537	Escherichia	0	0	0	0	20862	SAMEA4363434	198860	89	4989561	61.0481
ERR2138603	Escherichia	0	0	0	0	20862	SAMEA4363500	187554	83	4932274	45.5387
ERR2138640	Escherichia	0	0	0	0	20862	SAMEA4363540	134666	131	5262866	51.8495
ERR2138660	Escherichia	0	0	0	0	20862	SAMEA4363560	86127	157	4912306	55.0451
ERR2138701	Escherichia	1	0	0	0	20862	SAMEA4363606	196750	77	5028855	54.7181
ERR2138710	Escherichia	0	0	0	0	20862	SAMEA4363615	175760	117	5025508	57.4112
ERR2146820	Escherichia	0	0	0	0	20862	SAMEA4363118	154432	88	5070841	49.9865
ERR2189835	Listeria	1	0	0	0	20517	SAMEA104367715	361750	29	3085182	137.213
ERR2190020	Listeria	0	0	0	0	20517	SAMEA104367911	224996	29	2953746	42.0465
ERR2190033	Listeria	0	0	0	0	20517	SAMEA104367924	347022	20	2955201	218.448
ERR2190042	Listeria	0	0	0	0	20517	SAMEA104367934	482739	26	3083906	111.073
ERR2190102	Listeria	1	0	0	0	20517	SAMEA104367998	482150	25	3083044	273.368
ERR2203395	Escherichia	3	1	7.58	0.8	20862	SAMEA104399258	74256	136	4987941	79.298
ERR2204732	Escherichia	0	0	0	0	20862	SAMEA104402343	167255	126	5339435	88.1035
ERR2205880	Escherichia	2	0	0	0	20862	SAMEA104407472	315397	58	5113984	102.93
ERR2205891	Escherichia	3	1	8.95	1.12	20862	SAMEA104407483	34802	405	5476247	41.3724
ERR2205930	Escherichia	2	0	0	0	20862	SAMEA104407522	111439	117	5171005	110.242
ERR2205941	Escherichia	1	0	0	0	20862	SAMEA104407533	277448	53	5117357	115.505
ERR2209646	Escherichia	1	0	0	0	20862	SAMEA104412402	95027	183	5261801	37.8808
ERR2209730	Escherichia	0	0	0	0	20862	SAMEA104412486	105931	150	5112894	92.1521
ERR2223688	Escherichia	1	0	0	0	20931	SAMEA104437411	228288	108	5293025	68.4118
ERR2223728	Escherichia	0	0	0	0	20862	SAMEA104437451	217134	100	5086161	122.046
ERR2232685	Escherichia	0	0	0	0	20931	SAMEA104452179	44708	233	5356638	64.2524
ERR2237936	Escherichia	0	0	0	0	20862	SAMEA104457961	131534	149	5350979	79.8622
ERR2237968	Escherichia	0	0	0	0	20862	SAMEA104457993	248334	83	5053928	104.634
ERR2238078	Escherichia	1	0	0	0	20862	SAMEA104458103	159170	67	4922038	86.5118
ERR2261320	Listeria	0	0	0	0	20517	SAMEA104485048	1478940	17	2899207	65.7265
ERR2261416	Listeria	0	0	0	0	20517	SAMEA104485144	263999	20	2960189	147.071
ERR2261424	Listeria	1	0	0	0	20517	SAMEA104485152	476852	15	2916562	120.019
ERR2261447	Listeria	0	0	0	0	20517	SAMEA104485175	439420	16	3042538	97.4769
ERR2261448	Listeria	4	1	6.19	1.27	20517	SAMEA104485176	1478928	17	2939832	104.355
ERR2261451	Listeria	0	0	0	0	20517	SAMEA104485179	439420	20	3041003	182.515
ERR2261498	Listeria	0	0	0	0	20517	SAMEA104485226	450759	19	2960189	83.291
ERR2261502	Listeria	1	0	0	0	20517	SAMEA104485230	507904	15	2963324	102.602
ERR2261594	Listeria	0	0	0	0	20517	SAMEA104485322	455966	17	2959708	93.9721
ERR2261643	Listeria	1	0	0	0	20517	SAMEA104485371	419539	17	2914063	125.242
ERR2261686	Listeria	1	0	0	0	20517	SAMEA104485414	546412	15	2915169	115.104
ERR2309479	Listeria	0	0	0	0	20517	SAMEA104600638	294606	19	2871225	114.714
ERR2365403	Escherichia	1	0	0	0	20862	SAMEA3677949	120822	227	5464617	52.7131
ERR2365556	Escherichia	0	0	0	0	20862	SAMEA104667326	148355	73	4556490	971.352
ERR2512031	Listeria	0	0	0	0	20517	SAMEA1116773	312794	19	2936655	129.471
ERR2512046	Listeria	0	0	0	0	20517	SAMEA1116788	428399	14	2913284	125.1
ERR2519502	Listeria	2	0	0	0	20517	SAMEA4584573	167742	29	2992448	65.7956
ERR2519521	Listeria	0	0	0	0	20517	SAMEA4584592	505201	15	2890088	104.943
ERR2519532	Listeria	0	0	0	0	20517	SAMEA4584603	529715	15	2919998	86.3127
ERR2520947	Listeria:Micrococcus	0	1	NA	NA	0	SAMEA4585780	425958	77	3067576	40.4436
ERR2521120	Listeria	1	0	0	0	20517	SAMEA4585948	524622	25	3088350	168.141
ERR2521272	Listeria	0	0	0	0	20517	SAMEA4586078	355272	29	2917465	105.346
ERR2521562	Listeria	0	0	0	0	20517	SAMEA4586333	248624	32	2971813	79.6271
ERR2521607	Listeria	0	0	0	0	20517	SAMEA4586378	294478	26	3059561	81.7084
ERR2521615	Listeria	0	0	0	0	20517	SAMEA4586386	356198	22	2948302	147.685
ERR2521708	Listeria	0	0	0	0	20517	SAMEA4586465	69749	85	2963087	55.2904
ERR2521714	Listeria	0	0	0	0	20517	SAMEA4586471	109410	48	2962824	71.7324
ERR2521715	Listeria	0	0	0	0	20517	SAMEA4586472	74610	79	2906484	62.2257
ERR2521785	Listeria	1	0	0	0	20517	SAMEA4586535	437052	17	2923292	137.287
ERR2521898	Listeria	6	1	5.74	0.41	20517	SAMEA4586647	357057	27	2941217	72.066
ERR2521947	Listeria	2	0	0	0	20517	SAMEA4586697	225000	27	2950608	91.7202
ERR2522275	Listeria	0	0	0	0	20517	SAMEA4587025	260765	25	3035768	100.506
ERR2522998	Listeria	0	0	0	0	20517	SAMEA4587793	557686	12	2875596	86.8228
ERR2523677	Listeria	0	0	0	0	20517	SAMEA4588231	118582	56	2956153	112.017
ERR2523682	Listeria	1	0	0	0	20517	SAMEA4588236	228234	26	2960455	95.6779
ERR2523710	Listeria	0	0	0	0	20517	SAMEA4588264	504909	15	2926607	127.492
ERR2523753	Listeria	0	0	0	0	20517	SAMEA4588307	1497827	9	2869006	186.418
ERR2523776	Listeria	0	0	0	0	20517	SAMEA4588330	577338	19	2977815	185.001
ERR2531792	Listeria	0	0	0	0	20517	SAMEA4598929	543542	17	2889273	85.8589
ERR2594863	Escherichia	0	0	0	0	20862	SAMEA4682682	110964	151	5065008	35.2986
ERR2602034	Salmonella	0	0	0	0	20862	SAMEA4697682	406326	26	4691743	66.173
ERR2602113	Salmonella	0	0	0	0	20862	SAMEA4697761	264623	40	4690690	98.1573
ERR2602116	Salmonella	0	0	0	0	20862	SAMEA4697764	265651	42	4692409	101.105
ERR2602136	Escherichia	0	0	0	0	20862	SAMEA4697784	64263	220	5117075	80.3429
ERR2602152	Escherichia	0	0	0	0	20862	SAMEA4697800	96708	207	5312210	69.0953
ERR2602182	Escherichia	0	0	0	0	20862	SAMEA4697830	59359	289	5347682	58.5685
ERR2602183	Escherichia	0	0	0	0	20862	SAMEA4697831	111763	212	5355445	64.1054
ERR2602204	Escherichia	1	0	0	0	20862	SAMEA4697852	89042	213	5290240	53.8959
ERR2602205	Escherichia	0	0	0	0	20862	SAMEA4697853	136066	169	5256973	65.1735
ERR2602208	Escherichia	0	0	0	0	20862	SAMEA4697856	154756	172	5393256	85.1604
ERR2602231	Escherichia	1	0	0	0	20862	SAMEA4697879	238494	132	5366356	80.3884
ERR2607607	Salmonella	0	0	0	0	20862	SAMEA4700928	246580	54	4952301	108.155
ERR2652813	Escherichia	0	0	0	0	20862	SAMEA4744024	125826	98	4919815	83.7565
ERR2663520	Salmonella	0	0	0	0	20862	SAMEA4759107	204123	61	4732642	131.463
ERR2663559	Salmonella	0	0	0	0	20862	SAMEA4759146	161546	55	4684082	114.892
ERR2663595	Salmonella	0	0	0	0	20862	SAMEA4759183	161062	71	4919784	117.616
ERR2663596	Salmonella	0	0	0	0	20862	SAMEA4759184	204122	57	4722298	146.907
ERR2663600	Salmonella	0	0	0	0	20862	SAMEA4759188	154992	74	4885184	135.293
ERR2663738	Salmonella	2	0	0	0	20862	SAMEA4759326	204024	58	4706142	70.2376
ERR2663739	Salmonella	0	0	0	0	20862	SAMEA4759327	154846	58	4720460	120.901
ERR2694587	Escherichia	0	0	0	0	20862	SAMEA4783104	242874	71	5307331	74.0842
ERR2720993	Salmonella	0	0	0	0	20862	SAMEA4810818	187700	48	4732638	100.985
ERR2775988	Escherichia	2	0	0	0	20862	SAMEA4852535	184300	102	5061045	130.071
ERR2777526	Escherichia	5	1	5.63	0.32	20862	SAMEA4852549	387637	47	5014117	133.165
ERR2789244	Salmonella	0	0	0	0	20862	SAMEA104151782	144532	62	4822981	170.487
ERR2789249	Salmonella	0	0	0	0	20862	SAMEA104151787	162801	57	4703583	159.461
ERR2831570	Escherichia	0	0	0	0	20862	SAMEA4963544	179543	80	5219925	65.6411
ERR2835651	Escherichia	1	0	0	0	20862	SAMEA4969113	82104	225	5121619	47.773
ERR2836331	Salmonella	0	0	0	0	20862	SAMEA4969795	268702	37	4699005	80.8793
ERR538102	Listeria	0	0	0	0	20517	SAMEA2604661	478314	15	2992520	255.82
ERR555041	Listeria	0	0	0	0	20517	SAMEA2383420	356808	18	2911289	180.538
ERR564029	Listeria	2	0	0	0	20517	SAMEA2383296	572891	17	2956161	163.155
ERR564047	Listeria	0	0	0	0	20517	SAMEA2383314	321183	20	2996867	158.218
ERR564092	Listeria	0	0	0	0	20517	SAMEA2383359	416622	14	2914263	174.467
ERR564108	Listeria	0	0	0	0	20517	SAMEA2383375	339052	20	2994748	158.434
ERR564132	Listeria	0	0	0	0	20517	SAMEA2383399	281022	23	2982525	157.1
ERR664382	Listeria	0	0	0	0	20517	SAMEA3107718	476852	12	2876675	197.068
ERR664778	Listeria	0	0	0	0	20517	SAMEA3108003	437824	11	2879079	172.591
SRR1016583	Listeria	0	0	0	0	20517	SAMN02383857	477707	18	2927988	171.416
SRR1016588	Listeria	2	0	0	0	20517	SAMN02383862	409752	15	2926140	56.9998
SRR1016604	Listeria	0	0	0	0	20517	SAMN02383890	74681	86	3005051	57.6686
SRR1021944	Listeria	0	0	0	0	20517	SAMN02383873	542959	13	2926936	40.8649
SRR1027078	Listeria	0	0	0	0	20517	SAMN02400151	255380	19	2889182	70.3617
SRR1027102	Listeria	0	0	0	0	20517	SAMN02400175	188409	36	3015749	108.151
SRR1033762	Listeria	0	0	0	0	20517	SAMN02413352	361753	20	2878193	122.333
SRR1033773	Listeria	0	0	0	0	20517	SAMN02413363	1453813	7	2825110	111.339
SRR1039784	Listeria	0	0	0	0	20517	SAMN02422947	376668	21	2877841	38.4387
SRR1041524	Listeria	0	0	0	0	20517	SAMN02402290	505826	12	2861301	163.866
SRR1041618	Listeria	3	1	32.78	17.76	20517	SAMN02319520	226026	45	3081842	60.2632
SRR1048613	Listeria	0	0	0	0	20517	SAMN02442731	476209	23	3106864	183.343
SRR1068573	Listeria	0	0	0	0	20517	SAMN02566970	503256	20	2992707	126.306
SRR1068576	Listeria	0	0	0	0	20517	SAMN02566973	309352	19	2993563	121.287
SRR1112089	Listeria	0	0	0	0	20517	SAMN02582687	603054	11	2927141	144.706
SRR1112227	Listeria	1	0	0	0	20517	SAMN02582719	161164	31	2962829	54.9423
SRR1112233	Listeria	0	0	0	0	20517	SAMN02582722	510556	21	3042530	166.831
SRR1153450	Listeria	0	0	0	0	20517	SAMN02597580	425327	15	2974208	87.982
SRR1166835	Listeria	0	0	0	0	20517	SAMN02615860	436580	14	2845304	135.485
SRR1174764	Listeria	0	0	0	0	20517	SAMN02649538	433027	19	2826411	120.622
SRR1187616	Listeria	0	0	0	0	20517	SAMN02687571	537319	18	3005980	157.943
SRR1193963	Listeria	0	0	0	0	20517	SAMN02689384	527881	12	2987086	100.192
SRR1195646	Listeria	1	0	0	0	20517	SAMN02570902	528182	15	3023382	160.341
SRR1201304	Listeria	0	0	0	0	20517	SAMN02677679	352532	23	3059022	195.52
SRR1206152	Staphylococcus:Listeria	0	1	NA	NA	0	SAMN02709431	292361	33	3033830	217.067
SRR1220763	Listeria	0	0	0	0	20517	SAMN02567848	509933	17	2995458	156.836
SRR1263956	Listeria	0	0	0	0	20517	SAMN02737456	476502	14	2902287	121.239
SRR1269848	Listeria	0	0	0	0	20517	SAMN02741633	355718	15	2884171	140.052
SRR1269903	Listeria	0	0	0	0	20517	SAMN02741584	257764	26	2943345	120.768
SRR1269913	Listeria	1	0	0	0	20517	SAMN02741594	150340	41	3050166	52.9415
SRR1269947	Listeria	0	0	0	0	20517	SAMN02741499	252328	37	3112863	181.049
SRR1269954	Listeria	0	0	0	0	20517	SAMN02741455	351681	33	3083817	131.764
SRR1269994	Listeria	0	0	0	0	20517	SAMN02741529	134455	53	3052336	138.436
SRR1270020	Listeria	0	0	0	0	20517	SAMN02741507	255532	28	3053279	176.468
SRR1270026	Listeria	0	0	0	0	20517	SAMN02741598	476254	17	2944039	91.0418
SRR1270031	Listeria	0	0	0	0	20517	SAMN02741557	243362	33	3087215	57.7342
SRR1272475	Listeria	0	0	0	0	20517	SAMN02693753	92582	60	2925051	168.312
SRR1272519	Listeria	0	0	0	0	20517	SAMN02569911	288681	38	2985780	135.211
SRR1272781	Listeria	0	0	0	0	20517	SAMN02727340	293486	35	3026036	122.379
SRR1272852	Listeria	0	0	0	0	20517	SAMN02693759	248012	27	2970580	120.479
SRR1284675	Listeria	0	0	0	0	20517	SAMN02689403	293945	23	3045975	142.557
SRR1284698	Listeria	0	0	0	0	20517	SAMN02569954	1550556	17	3068689	116.909
SRR1284712	Listeria	0	0	0	0	20517	SAMN02569956	595797	16	3072085	141.692
SRR1288444	Listeria	0	0	0	0	20517	SAMN02781127	234596	37	3079107	121.257
SRR1378347	Listeria	0	0	0	0	20517	SAMN02850680	537319	17	3005992	98.13
SRR1394020	Listeria	0	0	0	0	20517	SAMN02854699	1457930	11	2861104	184.795
SRR1394059	Listeria	0	0	0	0	20517	SAMN02854703	255447	26	2955862	78.7757
SRR1451269	Listeria	0	0	0	0	20517	SAMN02847830	273005	19	2927848	97.813
SRR1481692	Listeria	0	0	0	0	20517	SAMN02769663	343740	21	2981873	157.368
SRR1505019	Listeria	0	0	0	0	20517	SAMN02900414	3213	1100	2536327	14.5831
SRR1505046	Listeria	1	0	0	0	20517	SAMN02900427	252227	39	3025592	75.2664
SRR1505059	Listeria	0	0	0	0	20517	SAMN02900430	541701	19	3028111	135.645
SRR1509620	Listeria	1	0	0	0	20517	SAMN02569889	510968	20	3017734	237.218
SRR1520091	Listeria	0	0	0	0	20517	SAMN02924384	476216	26	3070387	117.26
SRR1534911	Listeria	1	0	0	0	20517	SAMN02937338	524977	18	2931415	178.27
SRR1534960	Listeria	0	0	0	0	20517	SAMN02950449	260692	29	3030002	82.4164
SRR1544342	Listeria	0	0	0	0	20517	SAMN02850734	87059	67	2936226	19.6549
SRR1553756	Listeria	0	0	0	0	20517	SAMN02991383	1493520	11	2910585	154.683
SRR1553776	Salmonella	0	0	0	0	20862	SAMN02769683	367383	37	4710945	105.959
SRR1553793	Listeria	327	1	18.97	11.04	20517	SAMN02953931	78278	292	5870718	71.4028
SRR1553871	Listeria	0	0	0	0	20517	SAMN02990448	503896	24	3107135	151.703
SRR1556286	Listeria	0	0	0	0	20517	SAMN03002779	508273	19	3066147	61.1013
SRR1562108	Listeria	5	1	5.62	0.4	20517	SAMN03013659	515362	15	3035791	119.589
SRR1562109	Listeria	0	0	0	0	20517	SAMN03013662	414767	21	2838329	138.445
SRR1562114	Listeria	1	0	0	0	20517	SAMN03013667	466305	14	2876633	107.418
SRR1562133	Listeria	0	0	0	0	20517	SAMN03013686	301212	17	2922081	67.7145
SRR1562144	Listeria	0	0	0	0	20517	SAMN03013691	348333	18	2961275	68.0984
SRR1562155	Listeria	5	1	5.96	0.98	20517	SAMN03013675	293795	31	2985657	81.4678
SRR1575065	Listeria	0	0	0	0	20517	SAMN03067787	421529	15	2868179	107.156
SRR1575973	Listeria	1	0	0	0	20517	SAMN03015665	555431	9	2889208	80.8538
SRR1578497	Listeria	0	0	0	0	20517	SAMN03024047	542046	10	2890400	183.57
SRR1597471	Listeria	0	0	0	0	20517	SAMN03093466	439067	21	3027814	102.963
SRR1597484	Listeria	0	0	0	0	20517	SAMN03093478	408295	17	2923302	120.762
SRR1598796	Listeria	0	0	0	0	20517	SAMN03072627	528044	14	2947376	197.785
SRR1607295	Listeria	0	0	0	0	20517	SAMN03073843	436985	19	3037947	166.31
SRR1610004	Listeria	0	0	0	0	20517	SAMN02769768	537269	15	3014299	89.3235
SRR1610024	Listeria	0	0	0	0	20517	SAMN02769770	525402	25	3145966	156.981
SRR1619190	Listeria	0	0	0	0	20517	SAMN03093502	370383	25	2982292	107.265
SRR1623020	Listeria	1	0	0	0	20517	SAMN02769730	515927	17	2932068	76.9913
SRR1636540	Listeria	0	0	0	0	20517	SAMN03140286	420948	26	2948636	221.32
SRR1640007	Listeria	0	0	0	0	20517	SAMN03160796	308082	23	2914965	204.213
SRR1640208	Listeria	4	1	6.14	0.72	20517	SAMN03160848	541557	14	2974609	110.469
SRR1640221	Listeria	1	0	0	0	20517	SAMN03160851	1431747	12	2839946	102.885
SRR1649526	Listeria	0	0	0	0	20517	SAMN03164235	418263	33	3128503	104.219
SRR1657584	Listeria	0	0	0	0	20517	SAMN02902338	510340	14	2879108	101.04
SRR1657613	Listeria	0	0	0	0	20517	SAMN03165798	1475482	10	2929869	170.555
SRR1657616	Listeria	0	0	0	0	20517	SAMN03165801	205172	29	2927044	110.454
SRR1688443	Listeria	0	0	0	0	20517	SAMN02979275	507346	19	3062147	91.8743
SRR1695787	Listeria	1	0	0	0	20517	SAMN03253332	170854	30	2870096	86.8809
SRR1695818	Listeria	0	0	0	0	20517	SAMN03253364	349014	15	2904728	71.4779
SRR1709561	Listeria	0	0	0	0	20517	SAMN03260235	583646	14	2879034	178.76
SRR1709663	Listeria	1	0	0	0	20517	SAMN02769749	476419	18	2958260	70.9006
SRR1745459	Listeria	1	0	0	0	20517	SAMN03275473	350669	17	2948772	93.8941
SRR1753937	Listeria	0	0	0	0	20517	SAMN03276143	108363	57	2879841	100.11
SRR1763839	Listeria	0	0	0	0	20517	SAMN03278639	309860	13	2910487	277.158
SRR1767817	Listeria	0	0	0	0	20517	SAMN03218268	477945	15	2946055	109.275
SRR1779437	Listeria	0	0	0	0	20517	SAMN03317044	261657	24	2915045	86.8352
SRR1779463	Listeria	0	0	0	0	20517	SAMN03317052	320883	23	2877995	106.756
SRR1779484	Listeria	0	0	0	0	20517	SAMN03317055	259998	19	2948213	153.385
SRR1783164	Listeria	0	0	0	0	20517	SAMN03299421	286216	18	2950484	267.461
SRR1793279	Listeria	1	0	0	0	20517	SAMN03276151	325296	40	3145773	142.858
SRR1793283	Listeria	0	0	0	0	20517	SAMN03276152	320882	24	3118809	162.168
SRR1801541	Listeria	0	0	0	0	20517	SAMN03332966	476898	28	3052237	143.433
SRR1805357	Listeria	1	0	0	0	20517	SAMN03277655	508068	30	3003983	75.4633
SRR1805430	Listeria	0	0	0	0	20517	SAMN03277647	545648	18	2951848	79.7844
SRR1805440	Listeria	0	0	0	0	20517	SAMN03277740	477019	25	2985717	73.9588
SRR1805509	Listeria	68	1	6.6	4.86	20517	SAMN03277805	545016	26	2998890	1263.61
SRR1805524	Listeria	1	0	0	0	20517	SAMN03277766	1432126	15	2837423	142.595
SRR1805542	Listeria	1	0	0	0	20517	SAMN03277794	401758	25	2938912	79.7545
SRR1810568	Listeria	0	0	0	0	20517	SAMN03292647	175336	46	3078130	97.9635
SRR1812846	Listeria	0	0	0	0	20517	SAMN03285110	511010	20	3016943	118.497
SRR1814345	Listeria	1	0	0	0	20517	SAMN03357044	476801	21	2919679	99.7628
SRR1814348	Listeria	1	0	0	0	20517	SAMN03357047	176220	32	3067579	96.5335
SRR1814350	Listeria	3	1	7.72	1.72	20517	SAMN03357049	491379	18	2894646	119.789
SRR1814356	Listeria	0	0	0	0	20517	SAMN03357055	435527	30	3007701	83.5437
SRR1814362	Listeria	2	0	0	0	20517	SAMN03357061	509799	16	2965214	112.124
SRR1815984	Listeria	16	1	6.11	1.11	20517	SAMN03359273	281490	20	2892388	64.501
SRR1815996	Listeria	0	0	0	0	20517	SAMN03357923	541099	12	2819317	144.212
SRR1816056	Listeria	0	0	0	0	20517	SAMN03357983	357931	20	2912567	131.523
SRR1816394	Listeria	0	0	0	0	20517	SAMN03358321	425327	20	2927709	86.1397
SRR1816815	Listeria	3	1	7.54	1.81	20517	SAMN03353300	400845	27	3144106	124.694
SRR1816853	Listeria	1	0	0	0	20517	SAMN03353303	257078	41	3142123	89.4623
SRR1818057	Listeria	15	1	6.66	2.05	20517	SAMN03354314	310460	21	2906574	74.0407
SRR1818101	Listeria	14	1	8.79	2.28	20517	SAMN03354332	301163	24	3002413	45.3916
SRR1818103	Listeria	2	0	0	0	20517	SAMN02419860	563693	17	2943213	35.4874
SRR1818105	Listeria	3	1	6.22	0.98	20517	SAMN02419872	524391	15	2876466	145.92
SRR1825868	Listeria	1	0	0	0	20517	SAMN03354359	528074	15	2947140	129.233
SRR1849364	Listeria	0	0	0	0	20517	SAMN03354379	516701	18	3064848	93.9871
SRR1946972	Listeria	0	0	0	0	20517	SAMN02923474	477288	43	3001940	81.8451
SRR1952309	Listeria	1	0	0	0	20517	SAMN03459494	477704	16	2881408	97.8925
SRR1970569	Listeria	0	0	0	0	20517	SAMN03285142	685899	13	2953276	37.3888
SRR1973724	Listeria	0	0	0	0	20517	SAMN03435359	728680	16	3024945	117.698
SRR1980624	Listeria	0	0	0	0	20517	SAMN03135523	308081	24	3075500	212.406
SRR1988175	Listeria	0	0	0	0	20517	SAMN03565540	273649	18	2899073	94.4981
SRR1988315	Listeria	0	0	0	0	20517	SAMN03565623	221879	24	2928985	137.552
SRR1996279	Listeria	0	0	0	0	20517	SAMN03567990	535575	20	2877375	65.8628
SRR1996286	Listeria	0	0	0	0	20517	SAMN03567997	509933	12	2878750	128.31
SRR1998959	Listeria	0	0	0	0	20517	SAMN03465585	476405	18	2986050	149.981
SRR1998960	Listeria	1	0	0	0	20517	SAMN03465603	576240	15	2986384	101.669
SRR2002721	Listeria	2	0	0	0	20517	SAMN03573236	476407	19	2974994	157.179
SRR2003529	Listeria	0	0	0	0	20517	SAMN03487723	476406	29	3050928	248.283
SRR2029601	Listeria	0	0	0	0	20517	SAMN03654420	510492	20	3066154	118.879
SRR2029607	Listeria	0	0	0	0	20517	SAMN03654423	510492	17	3065354	116.195
SRR2039113	Listeria	0	0	0	0	20517	SAMN03700563	443888	16	2879289	92.3197
SRR2040644	Listeria	0	0	0	0	20517	SAMN03567160	546740	10	2868732	67.4996
SRR2047382	Listeria	0	0	0	0	20517	SAMN03755238	476021	36	3044554	181.994
SRR2047571	Listeria	0	0	0	0	20517	SAMN03755410	476021	28	3015649	167.925
SRR2047576	Listeria	0	0	0	0	20517	SAMN03755415	476871	29	3016752	213.856
SRR2048380	Listeria	0	0	0	0	20517	SAMN03067772	489225	40	2996871	69.2193
SRR2048407	Listeria	0	0	0	0	20517	SAMN03757631	316574	15	2835373	56.2067
SRR2051155	Listeria	0	0	0	0	20517	SAMN03761733	86794	63	2878916	52.8464
SRR2051280	Listeria	0	0	0	0	20517	SAMN03338485	302710	18	2870042	56.1934
SRR2053146	Listeria	0	0	0	0	20517	SAMN03763573	185472	41	3057246	116.603
SRR2053251	Listeria	0	0	0	0	20517	SAMN03763914	469116	19	2904914	107.427
SRR2061213	Listeria	0	0	0	0	20517	SAMN03649200	347844	27	2969172	177.809
SRR2061216	Listeria	0	0	0	0	20517	SAMN03649212	475404	29	2972805	65.211
SRR2062689	Listeria	0	0	0	0	20517	SAMN03766407	376892	15	2921652	1385.51
SRR2064110	Listeria	0	0	0	0	20517	SAMN03654390	68255	139	2921927	30.947
SRR2071452	Listeria	0	0	0	0	20517	SAMN03610651	360013	41	3048782	48.089
SRR2071977	Listeria	1	0	0	0	20517	SAMN02923207	476403	22	2961071	107.88
SRR2076002	Listeria	0	0	0	0	20517	SAMN03703933	478320	28	3097976	131.519
SRR2078919	Listeria	7	1	6.79	1.97	20517	SAMN03770175	347844	26	3024495	126.941
SRR2084362	Listeria	2	0	0	0	20517	SAMN03835493	113601	32	2861489	81.733
SRR2086073	Listeria	0	0	0	0	20517	SAMN03838748	350542	20	2964629	70.3092
SRR2102930	Listeria	0	0	0	0	20517	SAMN03860032	187537	31	3000440	79.363
SRR2134682	Listeria	0	0	0	0	20517	SAMN03892122	509954	13	2879301	379.691
SRR2134927	Listeria	1	0	0	0	20517	SAMN03922748	365509	14	2887142	66.511
SRR2138304	Listeria	0	0	0	0	20517	SAMN02709178	302418	20	2923344	130.919
SRR2138308	Listeria	0	0	0	0	20517	SAMN02709242	68367	104	3054951	147.072
SRR2138310	Listeria	0	0	0	0	20517	SAMN02709182	355719	22	2958498	85.6845
SRR2138315	Listeria	0	0	0	0	20517	SAMN02709221	24011	300	3048726	49.0678
SRR2140704	Listeria	0	0	0	0	20517	SAMN03877352	352941	27	3106943	308.175
SRR2143428	Listeria	0	0	0	0	20517	SAMN03946282	492914	19	3019813	60.9978
SRR2143464	Listeria	0	0	0	0	20517	SAMN03893579	437657	29	3194189	119.347
SRR2143486	Listeria	0	0	0	0	20517	SAMN03946283	510984	15	3037472	94.1533
SRR2154040	Listeria	5	1	6.45	0.49	20517	SAMN03976014	133069	47	2834258	81.6233
SRR2156569	Listeria	0	0	0	0	20517	SAMN03890907	479718	24	3014748	71.6002
SRR2156605	Listeria	0	0	0	0	20517	SAMN02921886	579512	23	3004187	155.534
SRR2401908	Listeria	0	0	0	0	20517	SAMN04075774	380114	36	3137811	205.053
SRR2412136	Listeria	0	0	0	0	20517	SAMN04087459	554892	13	2961632	177.009
SRR2533189	Listeria	0	0	0	0	20517	SAMN04116058	161809	36	2936537	58.454
SRR2544687	Listeria	0	0	0	0	20517	SAMN07210944	476418	16	3000552	133.082
SRR2544793	Listeria	0	0	0	0	20517	SAMN03702796	12773	391	2790731	84.0838
SRR2564615	Listeria	0	0	0	0	20517	SAMN04147142	308962	20	2910357	73.1907
SRR2578336	Listeria	0	0	0	0	20517	SAMN04108749	479718	21	3015569	128.454
SRR2584981	Listeria	0	0	0	0	20517	SAMN03736697	515308	18	3013651	211.583
SRR2650309	Listeria	0	0	0	0	20517	SAMN04155494	269563	41	2978280	130.005
SRR2673275	Listeria	0	0	0	0	20517	SAMN04192193	240197	30	2886885	31.6241
SRR2724039	Listeria	0	0	0	0	20517	SAMN04146127	476644	22	3112793	73.1559
SRR2727690	Listeria	0	0	0	0	20517	SAMN04195146	425593	19	2973196	76.9671
SRR2727857	Listeria	1	0	0	0	20517	SAMN04195170	260984	33	3000700	66.0406
SRR2728258	Listeria	1	0	0	0	20517	SAMN02709407	480686	15	2926361	139.052
SRR2777592	Listeria	0	0	0	0	20517	SAMN04191570	592146	19	3026815	169.277
SRR2831335	Listeria	0	0	0	0	20517	SAMN02922660	477168	23	3035547	188.617
SRR2848752	Listeria	0	0	0	0	20517	SAMN02923264	214435	41	3017012	149.144
SRR2848791	Listeria	0	0	0	0	20517	SAMN02923265	201151	30	2987480	207.28
SRR2848800	Listeria	0	0	0	0	20517	SAMN02923253	475154	27	3169958	162.328
SRR2878352	Listeria	0	0	0	0	20517	SAMN04192057	376713	22	3038517	98.1543
SRR2891022	Listeria	0	0	0	0	20517	SAMN02923256	360971	50	3214228	177.414
SRR2891028	Listeria	0	0	0	0	20517	SAMN02923248	454795	34	3217793	119.051
SRR2905858	Listeria	1	0	0	0	20517	SAMN04192067	436853	19	3039305	139.697
SRR2910648	Listeria	0	0	0	0	20517	SAMN03462198	228549	29	3017375	107.016
SRR2914361	Listeria	0	0	0	0	20517	SAMN04225960	427049	16	2846317	86.3016
SRR2914421	Listeria	0	0	0	0	20517	SAMN04263443	294725	27	2994670	73.1293
SRR2914422	Listeria	1	0	0	0	20517	SAMN04263444	355719	21	2997545	75.9456
SRR2914506	Listeria	0	0	0	0	20517	SAMN04244514	522529	16	2845017	202.439
SRR2916713	Listeria	1	0	0	0	20517	SAMN03702255	239037	22	3073084	86.251
SRR2917143	Listeria	0	0	0	0	20517	SAMN03702260	290160	26	3039758	89.6209
SRR2917155	Listeria	0	0	0	0	20517	SAMN03787611	165089	36	2921084	112.152
SRR2952737	Listeria	1	0	0	0	20517	SAMN02921551	511010	17	3017947	139.388
SRR2952742	Listeria	0	0	0	0	20517	SAMN02922327	477624	15	2923991	216.181
SRR2953197	Listeria	0	0	0	0	20517	SAMN04279581	248458	21	2928513	99.1031
SRR2962375	Listeria	0	0	0	0	20517	SAMN04146094	595580	12	3110378	79.8986
SRR2962382	Listeria	0	0	0	0	20517	SAMN04146077	504038	14	3106667	126.966
SRR2976738	Listeria	0	0	0	0	20517	SAMN02922303	477606	15	2923784	128.297
SRR2977537	Listeria	0	0	0	0	20517	SAMN04321470	508992	23	3052812	167.898
SRR3037440	Listeria	0	0	0	0	20517	SAMN04351217	438867	17	2919934	111.421
SRR3037960	Listeria	0	0	0	0	20517	SAMN04146041	553913	12	3080300	137.421
SRR3081937	Listeria	0	0	0	0	20517	SAMN04301694	302867	20	3014283	48.9474
SRR3082376	Listeria	0	0	0	0	20517	SAMN04301684	1497683	14	2951831	123.718
SRR3082379	Listeria	0	0	0	0	20517	SAMN04301687	510791	18	3015945	97.0438
SRR3091404	Listeria	0	0	0	0	20517	SAMN03285314	504369	29	3110006	108.643
SRR3091779	Listeria	0	0	0	0	20517	SAMN04388588	545164	15	2988761	101.881
SRR3101607	Listeria	0	0	0	0	20517	SAMN04338349	17814	283	2820912	98.1512
SRR3110338	Listeria	0	0	0	0	20517	SAMN04347230	631527	11	3027949	124.105
SRR3110513	Listeria	0	0	0	0	20517	SAMN04413827	292441	21	3016220	38.2808
SRR3110517	Listeria	0	0	0	0	20517	SAMN04347277	510321	15	3025701	79.8522
SRR3110522	Listeria	0	0	0	0	20517	SAMN04347282	510321	14	3025385	107.271
SRR3112474	Listeria	0	0	0	0	20517	SAMN04331091	559249	10	2972135	144.564
SRR3112479	Listeria	21	1	7.24	2.43	20517	SAMN04331078	477170	21	3048430	42.6709
SRR3112629	Listeria	0	0	0	0	20517	SAMN04331118	475737	15	2911443	139.391
SRR3113967	Listeria	0	0	0	0	20517	SAMN04331141	557698	12	2954764	142.789
SRR3113989	Listeria	0	0	0	0	20517	SAMN04331139	504337	18	3097755	113.256
SRR3114003	Listeria	0	0	0	0	20517	SAMN04331142	242120	33	3084443	31.6293
SRR3114192	Listeria	0	0	0	0	20517	SAMN04331171	503938	19	3059935	111.948
SRR3114196	Listeria	0	0	0	0	20517	SAMN04331204	437952	17	3011720	115.652
SRR3114220	Listeria	0	0	0	0	20517	SAMN04331178	296396	24	3014341	79.9485
SRR3114221	Listeria	0	0	0	0	20517	SAMN04331182	295721	24	3061778	72.8987
SRR3114226	Listeria	0	0	0	0	20517	SAMN04331181	1497331	14	2990812	117.642
SRR3115261	Listeria	0	0	0	0	20517	SAMN04386794	426126	22	3115858	100.884
SRR3131135	Listeria	0	0	0	0	20517	SAMN03462208	220740	43	3016061	157.848
SRR3133026	Listeria	0	0	0	0	20517	SAMN02934648	437059	12	2932897	182.222
SRR3133027	Listeria	0	0	0	0	20517	SAMN02934649	257458	26	3019842	154.69
SRR3136995	Listeria	0	0	0	0	20517	SAMN04450663	36565	149	2906190	28.4855
SRR3137221	Listeria	0	0	0	0	20517	SAMN04450879	236077	38	2986802	28.749
SRR3137558	Listeria	2	0	0	0	20517	SAMN02921922	476962	25	3005629	160.037
SRR3143810	Listeria	0	0	0	0	20517	SAMN03462202	163034	46	3014325	90.6276
SRR3147167	Listeria	0	0	0	0	20517	SAMN04450312	100334	78	3012827	80.8314
SRR3147937	Listeria	0	0	0	0	20517	SAMN04461766	109507	48	2908821	79.7705
SRR3173579	Listeria	0	0	0	0	20517	SAMN04146059	542778	22	3117002	146.983
SRR3173682	Listeria	0	0	0	0	20517	SAMN04146133	464962	18	3053207	156.564
SRR3173710	Listeria	0	0	0	0	20517	SAMN04479478	101157	42	2860834	219.76
SRR3173717	Listeria	1	0	0	0	20517	SAMN04479487	179076	39	3024711	101.968
SRR3184179	Listeria	0	0	0	0	20517	SAMN04146063	476353	25	3028895	199.261
SRR3185639	Listeria	0	0	0	0	20517	SAMN04487252	194310	26	2985794	121.691
SRR3199550	Listeria	0	0	0	0	20517	SAMN04528799	437998	21	3033853	108.661
SRR3199580	Listeria	0	0	0	0	20517	SAMN04506987	400845	23	3146043	126.04
SRR3210348	Listeria	0	0	0	0	20517	SAMN04536626	510084	16	3047974	100.689
SRR3214170	Listeria	0	0	0	0	20517	SAMN04487276	479987	24	3152856	141.281
SRR3214171	Listeria	0	0	0	0	20517	SAMN04487280	253244	22	2932831	203.058
SRR3214173	Listeria	0	0	0	0	20517	SAMN04487288	308083	21	3025444	194.238
SRR3215332	Listeria	0	0	0	0	20517	SAMN04539450	508274	12	2919408	143.884
SRR3215350	Listeria	1	0	0	0	20517	SAMN04530841	1475743	9	2896937	78.1052
SRR3218035	Listeria	1	0	0	0	20517	SAMN04545213	156495	32	2925256	137.575
SRR3218040	Listeria	0	0	0	0	20517	SAMN04545201	69313	79	3008409	101.936
SRR3222074	Listeria	0	0	0	0	20517	SAMN09077460	262917	28	3094192	154.577
SRR3242150	Listeria	0	0	0	0	20517	SAMN02923077	320838	17	2917499	103.753
SRR3271903	Listeria	0	0	0	0	20517	SAMN04558473	24107	235	2882723	52.9772
SRR3306290	Listeria	0	0	0	0	20517	SAMN04573303	1501363	11	2918234	130.475
SRR3309160	Listeria	0	0	0	0	20517	SAMN02922142	557534	10	2889634	195.533
SRR3340455	Listeria	0	0	0	0	20517	SAMN02923200	356618	34	3015407	159.757
SRR3344823	Listeria	0	0	0	0	20517	SAMN04543099	566907	11	2961073	121.017
SRR3360256	Listeria	0	0	0	0	20517	SAMN04622902	297044	18	2887469	158.415
SRR3379299	Listeria	0	0	0	0	20517	SAMN04633631	308084	25	3102443	107.617
SRR3380004	Listeria	0	0	0	0	20517	SAMN04632065	282128	25	2957521	90.5952
SRR3400306	Listeria	0	0	0	0	20517	SAMN04625732	320793	24	3014416	82.3318
SRR3400308	Listeria	0	0	0	0	20517	SAMN04625734	503938	23	3120059	95.8376
SRR3400329	Listeria	1	0	0	0	20517	SAMN04639708	503441	15	3054922	62.6413
SRR3400345	Listeria	2	0	0	0	20517	SAMN04640341	315448	22	3109155	76.3751
SRR3407806	Listeria	0	0	0	0	20517	SAMN04523260	300699	29	2935040	87.0571
SRR3436434	Listeria	0	0	0	0	20517	SAMN04870879	22029	252	2928593	29.7179
SRR3453140	Listeria	0	0	0	0	20517	SAMN04331770	553910	14	3075225	133.168
SRR3474599	Listeria	1	0	0	0	20517	SAMN04914050	255647	30	3024608	76.0533
SRR3474633	Listeria	3	1	5.85	0.35	20517	SAMN04914034	433123	22	3090417	71.0339
SRR3474672	Listeria	0	0	0	0	20517	SAMN04925783	218477	27	3023320	89.8707
SRR3488751	Listeria	1	0	0	0	20517	SAMN04962258	24728	237	2875790	65.9079
SRR3489854	Listeria	6	1	7.36	2.48	20517	SAMN04916739	480070	18	3018045	88.0725
SRR3489975	Listeria	3	1	7.1	1.48	20517	SAMN04902970	480070	21	3018754	78.585
SRR3489999	Listeria	0	0	0	0	20517	SAMN04902993	545164	12	2989463	100.597
SRR3490000	Listeria	0	0	0	0	20517	SAMN04902994	545164	13	2989138	98.9347
SRR3490096	Listeria	2	0	0	0	20517	SAMN04916675	301540	28	3159269	93.3905
SRR3490129	Listeria	0	0	0	0	20517	SAMN04942922	212913	28	3110073	85.6297
SRR3509943	Listeria	0	0	0	0	20517	SAMN04575428	540829	13	2882302	142.584
SRR3510304	Listeria	0	0	0	0	20517	SAMN05001507	555493	12	2919866	36.7689
SRR3535394	Listeria	0	0	0	0	20517	SAMN05004890	453567	13	2952539	80.0428
SRR3554626	Listeria	0	0	0	0	20517	SAMN05150252	424166	16	2925029	125.9
SRR3571286	Listeria	0	0	0	0	20517	SAMN04575433	434696	15	2833744	160.626
SRR3571296	Listeria	0	0	0	0	20517	SAMN04575442	297679	24	2927965	168.806
SRR3571297	Listeria	0	0	0	0	20517	SAMN04575443	418312	18	2870071	160.812
SRR3578128	Listeria	0	0	0	0	20517	SAMN05170499	43618	120	3093926	56.5467
SRR3593512	Listeria	0	0	0	0	20517	SAMN05058062	586487	20	3160881	89.6311
SRR3606553	Listeria	0	0	0	0	20517	SAMN05044535	565160	18	2981934	202.421
SRR3606925	Listeria	1	0	0	0	20517	SAMN05163897	631893	12	2928957	58.7322
SRR3606953	Listeria	0	0	0	0	20517	SAMN05157205	186469	35	2908831	88.5171
SRR3606963	Listeria	8	1	8.94	2.27	20517	SAMN05157216	94549	60	2905001	39.5885
SRR3606965	Listeria	3	1	8.15	0.54	20517	SAMN05157219	105771	60	2903732	47.4654
SRR3634417	Listeria	0	0	0	0	20517	SAMN05173324	509490	24	3052395	135.335
SRR3634435	Listeria	0	0	0	0	20517	SAMN02921765	184152	36	2970259	61.9636
SRR3634437	Listeria	1	0	0	0	20517	SAMN02922107	476905	27	2979574	79.0292
SRR3642988	Listeria	0	0	0	0	20517	SAMN04991916	75537	71	2966929	162.396
SRR3657266	Listeria	1	0	0	0	20517	SAMN05219435	364574	25	3031996	120.925
SRR3659463	Listeria	0	0	0	0	20517	SAMN02922522	207585	28	2872915	76.9191
SRR3723050	Listeria	0	0	0	0	20517	SAMN05294082	524858	15	2946270	104.746
SRR3723072	Listeria	0	0	0	0	20517	SAMN05296700	89815	67	2888542	178.511
SRR3724524	Listeria	0	0	0	0	20517	SAMN05277894	527596	23	3071876	42.5729
SRR3726298	Listeria	0	0	0	0	20517	SAMN05301289	72671	82	3002131	56.3448
SRR3826858	Listeria	0	0	0	0	20517	SAMN05372194	475412	11	2940967	112.33
SRR3930182	Listeria	0	0	0	0	20517	SAMN02923563	557705	14	3033885	78.2121
SRR3932725	Listeria	0	0	0	0	20517	SAMN05367115	26809	240	2961163	163.191
SRR3945589	Listeria	0	0	0	0	20517	SAMN02921770	239353	32	2977649	117.1
SRR3948512	Listeria	0	0	0	0	20517	SAMN05425849	504827	12	2907504	81.0811
SRR3953128	Listeria	0	0	0	0	20517	SAMN05440896	114583	50	2934483	110.53
SRR3986222	Listeria	0	0	0	0	20517	SAMN02922394	211791	21	2887120	29.3685
SRR4000016	Listeria	0	0	0	0	20517	SAMN05425847	79347	96	3022820	96.9583
SRR4005306	Listeria	1	0	0	0	20517	SAMN05514434	193959	24	3101207	84.1919
SRR4032186	Listeria	0	0	0	0	20517	SAMN05578035	548430	12	2859244	76.9186
SRR4032991	Listeria	0	0	0	0	20517	SAMN05578435	306242	23	2926438	51.3687
SRR4046824	Listeria	0	0	0	0	20517	SAMN05604762	1475321	10	2880109	51.8924
SRR4050189	Listeria	0	0	0	0	20517	SAMN05606869	104709	77	3133800	84.4181
SRR4052049	Listeria	0	0	0	0	20517	SAMN05615082	21279	288	2930668	28.329
SRR4052064	Listeria	1	0	0	0	20517	SAMN05615120	69946	88	3045169	31.1046
SRR4052142	Listeria	1	0	0	0	20517	SAMN05615196	155650	38	2989434	99.3008
SRR4052157	Listeria	3	1	6.16	0.99	20517	SAMN05615226	438141	20	2857489	83.3467
SRR4052171	Listeria	0	0	0	0	20517	SAMN05615251	256524	22	2993664	194.704
SRR4052184	Listeria	78	1	5.87	1.63	20517	SAMN05615254	574337	19	2936038	105.799
SRR4052269	Listeria	2	0	0	0	20517	SAMN05615381	198812	36	2996390	77.9165
SRR4052316	Listeria	0	0	0	0	20517	SAMN05615389	425250	24	2915632	116.928
SRR4052339	Listeria	0	0	0	0	20517	SAMN05615404	122145	46	2958145	165.405
SRR4064280	Listeria	0	0	0	0	20517	SAMN05647807	4730	854	2729177	15.0985
SRR4064287	Listeria	0	0	0	0	20517	SAMN05647750	130946	47	2892485	52.8843
SRR4064291	NA	0	0	0	0	21285	SAMN05647721	0	0	0	0
SRR4089976	Listeria	0	0	0	0	20517	SAMN05713237	503991	13	2888198	224.064
SRR4175263	Listeria	0	0	0	0	20517	SAMN05713748	488758	17	2997515	264.154
SRR4190335	Listeria	0	0	0	0	20517	SAMN05725255	434577	25	3014063	162.697
SRR4228348	Listeria	0	0	0	0	20517	SAMN05757870	1507415	7	2897741	361.363
SRR4237755	Listeria	0	0	0	0	20517	SAMN05521558	478627	16	2985361	91.0061
SRR4239759	Listeria	0	0	0	0	20517	SAMN05763243	423322	15	2958081	158.126
SRR4294730	Listeria	0	0	0	0	20517	SAMN05824161	270797	36	2868283	64.0837
SRR4305576	Listeria	0	0	0	0	20517	SAMN05852391	347844	27	3003044	75.6544
SRR4416161	Listeria	0	0	0	0	20517	SAMN05897823	185392	52	2951259	53.1963
SRR4421252	Listeria	0	0	0	0	20517	SAMN05907815	371669	26	2937177	103.195
SRR4421260	Listeria	0	0	0	0	20517	SAMN05907803	104615	53	2959804	41.1339
SRR4421262	Listeria	0	0	0	0	20517	SAMN05907801	363514	17	2861742	68.0622
SRR4435447	Listeria	2	0	0	0	20517	SAMN05721610	19750	331	3007669	101.748
SRR4446252	Listeria	0	0	0	0	20517	SAMN05900824	1540605	15	3032305	140.655
SRR4446287	Listeria	0	0	0	0	20517	SAMN05900823	1497683	11	2992750	161.177
SRR4446462	Listeria	0	0	0	0	20517	SAMN05521573	510363	20	3016137	158.688
SRR4473730	Listeria	0	0	0	0	20517	SAMN05900811	524631	16	2933909	150.519
SRR4733972	Listeria	0	0	0	0	20517	SAMN05914618	347844	28	3052577	106.275
SRR4875390	Listeria	0	0	0	0	20517	SAMN05900848	254595	28	3089118	184.277
SRR4893112	Listeria	0	0	0	0	20517	SAMN05977908	514334	13	2959655	135.217
SRR4929959	Listeria	0	0	0	0	20517	SAMN05981694	477606	14	2924611	66.2619
SRR4947449	Listeria	0	0	0	0	20517	SAMN05916209	33951	185	2998426	45.8122
SRR5000312	Listeria	0	0	0	0	20517	SAMN05179424	308082	21	3103769	127.677
SRR5000710	Listeria	0	0	0	0	20517	SAMN05755932	185058	38	2928354	328.466
SRR5000713	Listeria	0	0	0	0	20517	SAMN05755934	91802	101	3025981	118.521
SRR5016720	Listeria	0	0	0	0	20517	SAMN05179406	310035	22	3009725	61.7746
SRR5016847	Listeria	3	1	6.19	1.12	20517	SAMN05326720	184673	33	2907170	82.1463
SRR5016880	Listeria	0	0	0	0	20517	SAMN04942863	1497468	13	2961426	109.668
SRR5037791	Bacillus:Listeria	0	1	NA	NA	0	SAMN05967950	12953	1541	8035216	25.9863
SRR5037886	Listeria	0	0	0	0	20517	SAMN05967937	105993	52	3050524	75.9665
SRR5042995	Listeria	0	0	0	0	20517	SAMN06029259	476777	32	3143588	108.809
SRR5049011	Listeria	0	0	0	0	20517	SAMN06045843	349358	18	3068229	72.0737
SRR5057178	Listeria	0	0	0	0	20517	SAMN06034634	119890	45	2916667	105.445
SRR5062562	Listeria	0	0	0	0	20517	SAMN06076122	146977	44	3008037	32.3416
SRR5066078	Listeria	0	0	0	0	20517	SAMN05179420	293616	23	2876478	88.6308
SRR5076672	Listeria	0	0	0	0	20517	SAMN06068191	528014	14	2990741	100.41
SRR5079899	Listeria	0	0	0	0	20517	SAMN06111758	345532	16	2928832	101.784
SRR5093689	Listeria	0	0	0	0	20517	SAMN06127387	513962	17	3062318	203.268
SRR5100799	Listeria	0	0	0	0	20517	SAMN06135327	476412	11	2873260	72.8272
SRR5105955	Listeria	0	0	0	0	20517	SAMN05938997	557683	14	2856997	140.898
SRR5116291	Listeria	0	0	0	0	20517	SAMN06159564	235005	29	2963683	86.8792
SRR5116292	Listeria	0	0	0	0	20517	SAMN06159563	161920	38	2990664	110.807
SRR5116686	Listeria	0	0	0	0	20517	SAMN05900784	476407	22	2984380	248.966
SRR5120771	Listeria	0	0	0	0	20517	SAMN05791379	126119	57	3093975	29.0089
SRR5120983	Listeria	0	0	0	0	20517	SAMN06140511	442347	28	3109036	23.3389
SRR5133470	Listeria	0	0	0	0	20517	SAMN06187122	287066	19	2906693	89.7115
SRR5159838	Listeria	0	0	0	0	20517	SAMN06115630	477415	15	2889564	45.7744
SRR5160240	Listeria	0	0	0	0	20517	SAMN06115619	482429	21	3088414	69.2979
SRR5160252	Listeria	0	0	0	0	20517	SAMN06115621	253581	32	2968702	22.1421
SRR5163795	Listeria	0	0	0	0	20517	SAMN06214748	261140	18	2872672	76.3502
SRR5205363	Listeria	0	0	0	0	20517	SAMN03135513	432685	16	2942845	144.938
SRR5209224	Listeria	0	0	0	0	20517	SAMN02937474	1451435	14	2867356	317.171
SRR5219655	Listeria	0	0	0	0	20517	SAMN06276547	55580	116	2972209	99.2234
SRR5222974	Escherichia	0	0	0	0	20862	SAMN06230003	100381	231	5569973	138.101
SRR5296221	Escherichia	0	0	0	0	20862	SAMN06283451	128431	222	5409132	76.6871
SRR5296384	Escherichia	2	0	0	0	20862	SAMN04606407	117595	188	5058331	385.93
SRR5318410	Escherichia	0	0	0	0	20862	SAMN03997219	145027	185	5349172	38.0571
SRR5329206	Escherichia	0	0	0	0	20931	SAMN06473882	42806	410	5571994	67.9852
SRR5329211	Escherichia	0	0	0	0	20862	SAMN06473885	103936	171	5295004	71.3556
SRR5329212	Escherichia	0	0	0	0	20862	SAMN06462395	188287	165	5428075	84.6059
SRR5365000	Escherichia	0	0	0	0	20931	SAMN06607504	135789	170	5339524	103.959
SRR5365006	Escherichia	0	0	0	0	20862	SAMN06608612	100155	151	5399752	84.3714
SRR5366626	Escherichia	0	0	0	0	20862	SAMN06622171	145333	153	5339155	104.349
SRR5367987	Escherichia	0	0	0	0	20862	SAMN06630132	135404	95	4923426	125.519
SRR5368337	Escherichia	1	0	0	0	20862	SAMN06630290	61777	175	4934654	61.0294
SRR5385223	Escherichia	0	0	0	0	20862	SAMN06645225	133572	167	5462512	78.4514
SRR5430177	Escherichia	1	0	0	0	20862	SAMN06702081	46116	299	5319318	36.7022
SRR5434320	Escherichia	0	0	0	0	20862	SAMN06684369	183075	66	5025661	45.373
SRR5434385	Escherichia	0	0	0	0	20862	SAMN06677717	182117	108	5322818	94.414
SRR5434963	Escherichia	0	0	0	0	20862	SAMN06688645	58068	280	5420439	59.2664
SRR5434987	Escherichia	0	0	0	0	20862	SAMN06681414	101478	204	5425978	42.1782
SRR5438178	Escherichia	2	0	0	0	20931	SAMN06689970	176742	66	4564371	47.0442
SRR5438200	Escherichia	0	0	0	0	20931	SAMN06689970	203175	60	4566178	48.2505
SRR5447688	Escherichia	1	0	0	0	20862	SAMN06737507	82667	116	4556893	73.3949
SRR5452214	Escherichia	1	0	0	0	20931	SAMN06645736	61938	206	5355766	74.3199
SRR5458852	Escherichia	0	0	0	0	20862	SAMN06677733	61294	179	4754126	101.593
SRR5459156	Escherichia	3	1	6.99	2.13	20862	SAMN06645797	244719	84	5343825	86.2128
SRR5461677	Escherichia	0	0	0	0	20862	SAMN06760374	205738	54	4709193	79.8637
SRR5469655	Escherichia	0	0	0	0	20862	SAMN06645836	89203	135	5135181	95.3688
SRR5470247	Escherichia	0	0	0	0	20862	SAMN06826826	103287	144	5171871	76.8229
SRR5470252	Escherichia	0	0	0	0	20862	SAMN06826822	123244	161	5343152	110.935
SRR5470255	Escherichia	0	0	0	0	20862	SAMN06826854	140228	109	4901560	71.0777
SRR5470258	Escherichia	0	0	0	0	20862	SAMN06826852	69768	172	4909139	68.6948
SRR5470984	Escherichia	1	0	0	0	20862	SAMN06689620	66371	188	4895451	105.583
SRR5471002	Escherichia	1	0	0	0	20862	SAMN06689632	294915	78	5160127	99.1507
SRR5488051	Escherichia	0	0	0	0	20862	SAMN06848535	199166	59	5049887	121.335
SRR5493691	Escherichia	0	0	0	0	20931	SAMN06858679	131261	60	4526834	85.9727
SRR5493692	Escherichia	1	0	0	0	20862	SAMN06858678	128340	65	4549635	65.7534
SRR5512157	Escherichia	0	0	0	0	20862	SAMN06893708	139702	151	5108012	68.3272
SRR5512247	Escherichia	0	0	0	0	20931	SAMN06893790	50811	214	5184626	22.6658
SRR5516023	Escherichia	0	0	0	0	20862	SAMN06842797	217465	105	5281019	94.6505
SRR5526028	Escherichia	0	0	0	0	20862	SAMN06461737	77658	173	4819290	123.096
SRR5573090	Salmonella	1	0	0	0	20862	SAMN02911960	261096	39	4919026	90.9939
SRR5573098	Salmonella	0	0	0	0	20862	SAMN02911968	210569	66	5054012	78.8524
SRR5573996	Escherichia	0	0	0	0	20931	SAMN06958580	147825	141	5401318	58.0412
SRR5574010	Escherichia	0	0	0	0	20862	SAMN06958412	188305	160	5347280	64.8637
SRR5588537	Escherichia	0	0	0	0	20862	SAMN06847866	123398	174	5259279	90.6589
SRR5632333	Escherichia	0	0	0	0	20862	SAMN07173260	89375	260	5497269	137.412
SRR5632765	Escherichia	0	0	0	0	20862	SAMN07149966	133754	215	5463194	61.529
SRR5632899	Escherichia	1	0	0	0	20931	SAMN07159151	70819	282	5107498	62.8917
SRR5633078	Escherichia	0	0	0	0	20862	SAMN07160231	178780	83	5124845	181.836
SRR5638631	Escherichia	1	0	0	0	20931	SAMN07184674	59654	203	4506612	23.5619
SRR5642705	Escherichia	0	0	0	0	20931	SAMN07180931	25647	350	4391571	133.321
SRR5643034	Escherichia	0	0	0	0	20931	SAMN07177489	113607	194	5545972	41.7966
SRR5646678	Escherichia	1	0	0	0	20862	SAMN06848530	73774	124	4741033	98.2173
SRR5649779	Escherichia	1	0	0	0	20862	SAMN05526606	95468	274	5278295	32.3584
SRR5649828	Escherichia	0	0	0	0	20862	SAMN06645879	122123	109	5055396	94.2087
SRR5781903	Escherichia	0	0	0	0	20934	SAMN07273987	68653	214	5065398	58.4458
SRR5787722	Escherichia	0	0	0	0	20862	SAMN07286176	137632	194	5401870	146.424
SRR5787965	Escherichia	4	1	5.66	0.49	20862	SAMN07224230	100850	222	5404957	108.669
SRR5805556	Escherichia	0	0	0	0	20931	SAMN07210945	210426	61	4975925	128.953
SRR5805570	Escherichia	0	0	0	0	20931	SAMN07210945	107440	112	4963895	88.1835
SRR5812342	Escherichia	5	1	5.72	0.49	20862	SAMN07312865	103983	195	5411996	82.6477
SRR5814922	Escherichia	0	0	0	0	20862	SAMN07317913	109470	217	5517295	109.674
SRR5821465	Escherichia	0	0	0	0	20862	SAMN07173914	143644	97	5125668	207.468
SRR5833456	Escherichia	0	0	0	0	20862	SAMN07340644	113977	218	5538825	139.691
SRR5851800	Escherichia	0	0	0	0	20862	SAMN06264214	57808	142	4527657	250.061
SRR5861886	Escherichia	0	0	0	0	20862	SAMN07159361	148117	163	5315961	70.8313
SRR5870516	Escherichia	0	0	0	0	20862	SAMN07409507	97096	175	5284709	69.9299
SRR5870992	Escherichia	2	0	0	0	20862	SAMN07375739	149936	179	5407007	74.4168
SRR5877093	Salmonella	0	0	0	0	20862	SAMN07420412	63280	139	4688177	77.1783
SRR5884040	Escherichia	2	0	0	0	20862	SAMN07419716	107306	225	5392252	84.4651
SRR5884055	Escherichia	0	0	0	0	20931	SAMN07419006	111672	150	5462660	71.042
SRR5885996	Escherichia	0	0	0	0	20862	SAMN07430782	91906	259	5446081	122.867
SRR5886010	Escherichia	0	0	0	0	20862	SAMN07430864	93958	265	5392734	78.0209
SRR5886082	Escherichia	0	0	0	0	20862	SAMN07430880	89128	267	5373722	85.4202
SRR5890692	Escherichia	0	0	0	0	20862	SAMN07423432	92787	213	5268664	108.367
SRR5890771	Escherichia	1	0	0	0	20862	SAMN07419916	128038	178	5240801	87.1902
SRR5892875	Escherichia	0	0	0	0	20862	SAMN07439632	99418	204	5516963	90.6196
SRR5893171	Escherichia	0	0	0	0	20862	SAMN07429341	94358	162	5209059	45.3801
SRR5904129	Escherichia	0	0	0	0	20862	SAMN07455255	133231	226	5421521	101.059
SRR5927206	Escherichia	0	0	0	0	20862	SAMN07488849	193199	121	5110641	96.8846
SRR5928130	Escherichia	0	0	0	0	20862	SAMN07229836	286216	60	5129973	96.9391
SRR5934633	Escherichia	1	0	0	0	20862	SAMN07461466	97861	241	5519712	58.7581
SRR5934644	Escherichia	0	0	0	0	20862	SAMN07485675	103994	227	5499152	96.7057
SRR5939816	Escherichia	0	0	0	0	20931	SAMN07450835	55597	265	5256611	129.95
SRR5942403	Escherichia	0	0	0	0	20862	SAMN07509372	138738	156	5108998	80.9937
SRR5944306	Escherichia	0	0	0	0	20862	SAMN07456241	111758	212	5407062	70.2337
SRR5944589	Escherichia	0	0	0	0	20862	SAMN07500939	102551	204	5393742	68.784
SRR5949059	Escherichia	0	0	0	0	20862	SAMN07504978	148948	153	5170935	79.2499
SRR5949068	Escherichia	0	0	0	0	20862	SAMN07513367	147601	119	5096123	98.7705
SRR5951654	Escherichia	0	0	0	0	20862	SAMN07486984	126828	165	5330514	53.7763
SRR5998794	Escherichia	7	1	11.46	11.69	20862	SAMN07595920	90360	309	5345030	93.2626
SRR6001308	Escherichia	0	0	0	0	20862	SAMN07601784	122129	230	5258603	90.0689
SRR6039423	Escherichia	0	0	0	0	20931	SAMN07629535	114246	193	5277138	68.3176
SRR6039608	Escherichia	0	0	0	0	20862	SAMN07617991	96941	200	5500482	91.154
SRR6051677	Escherichia	0	0	0	0	20931	SAMN07665803	94230	191	5448699	109.564
SRR6051752	Escherichia	1	0	0	0	20862	SAMN07672225	67646	226	5197545	80.0068
SRR6051812	Escherichia	0	0	0	0	20862	SAMN07672242	78980	237	5231865	73.9792
SRR6051817	Escherichia	0	0	0	0	20862	SAMN07672250	127512	216	5246346	85.5282
SRR6051878	Escherichia	0	0	0	0	20862	SAMN07672310	116657	203	5243982	88.5753
SRR6052032	Escherichia	0	0	0	0	20862	SAMN07672560	140156	210	5340335	90.0165
SRR6052087	Escherichia	0	0	0	0	20862	SAMN07672574	135683	188	5292341	74.7348
SRR6052717	Escherichia	5	1	7.96	1.95	20862	SAMN07672731	106362	607	5696130	58.2254
SRR6052841	Escherichia	0	0	0	0	20862	SAMN07672957	91514	276	5240920	65.9572
SRR6052864	Escherichia	0	0	0	0	20862	SAMN07673065	107220	232	5362277	51.1216
SRR6058002	Escherichia	1	0	0	0	20862	SAMN07638441	113417	225	5243981	103.384
SRR6060979	Escherichia	0	0	0	0	20862	SAMN07624406	147331	190	5354098	49.4058
SRR6061318	Escherichia	0	0	0	0	20862	SAMN04420191	107214	214	5254545	37.1803
SRR6061332	Escherichia	0	0	0	0	20862	SAMN04420185	110407	118	4904630	106.139
SRR6069447	Escherichia	0	0	0	0	20862	SAMN07652456	163233	179	5335248	133.417
SRR6069478	Escherichia	1	0	0	0	20862	SAMN07625721	56913	294	5222386	72.637
SRR6071815	Escherichia	0	0	0	0	20931	SAMN07629561	83591	279	5513473	79.2652
SRR6072231	Escherichia	0	0	0	0	20862	SAMN07624408	148116	161	5380253	70.1379
SRR6108610	Escherichia	0	0	0	0	20862	SAMN07693617	180122	158	5389264	79.1929
SRR6111541	Escherichia	4	1	7.16	2.44	20862	SAMN07677099	156973	93	5165230	112.71
SRR6111581	Escherichia	0	0	0	0	20862	SAMN07677423	64270	195	4860102	22.767
SRR6111690	Escherichia	5	1	5.96	0.9	20862	SAMN07677131	252291	77	5051479	100.129
SRR6111705	Escherichia	0	0	0	0	20862	SAMN07677343	199108	84	4995041	118.573
SRR6111871	Escherichia	0	0	0	0	20862	SAMN07677289	116482	148	5040534	40.3317
SRR6121971	Escherichia	0	0	0	0	20931	SAMN07722651	56884	251	5295877	67.6773
SRR6128600	Escherichia	0	0	0	0	20862	SAMN07709921	70597	271	5202820	57.1543
SRR6154938	Escherichia	0	0	0	0	20862	SAMN05504942	99062	254	5541481	102.598
SRR6154943	Escherichia	1	0	0	0	20862	SAMN05504947	138406	170	5317347	105.013
SRR6160912	Escherichia	0	0	0	0	20862	SAMN07738632	2737	2168	4166460	36.1248
SRR6164707	Escherichia	0	0	0	0	20862	SAMN07750116	104225	191	5381751	115.397
SRR6164727	Escherichia	0	0	0	0	20862	SAMN07568591	93892	209	5171791	121.76
SRR6170208	Escherichia	1	0	0	0	20862	SAMN07761998	89698	98	4535752	53.4791
SRR6170258	Escherichia	2	0	0	0	20862	SAMN07761838	45881	189	4483109	41.2153
SRR6170299	Escherichia	0	0	0	0	20862	SAMN07762142	83079	114	4403695	56.4183
SRR6170500	Escherichia	0	0	0	0	20862	SAMN07762127	73925	141	4497704	35.4767
SRR6170515	Escherichia	2	0	0	0	20862	SAMN07761946	42497	184	4496186	81.2864
SRR6170522	Escherichia	0	0	0	0	20862	SAMN07762037	81946	105	4418246	45.4222
SRR6170618	Escherichia	0	0	0	0	20862	SAMN07762353	8509	798	4298233	16.6859
SRR6170748	Escherichia	1	0	0	0	20862	SAMN07762328	64988	143	4486087	56.4547
SRR6170823	Escherichia	0	0	0	0	20862	SAMN07762331	68275	128	4470168	34.2356
SRR6171002	Escherichia	0	0	0	0	20862	SAMN07762219	69541	124	4503987	38.1139
SRR6171036	Escherichia	0	0	0	0	20862	SAMN07762371	85096	102	4388939	34.1293
SRR6171039	Escherichia	0	0	0	0	20862	SAMN07762372	89697	90	4394928	97.9233
SRR6172905	Escherichia	0	0	0	0	20862	SAMN07762546	59917	138	4469861	44.0856
SRR6172950	Escherichia	2	0	0	0	20862	SAMN07762691	54680	142	4488844	62.7219
SRR6173949	Escherichia	0	0	0	0	20862	SAMN07762818	80197	110	4383638	55.6147
SRR6174046	Escherichia	2	0	0	0	20862	SAMN07762913	99191	106	4461253	45.0113
SRR6174087	Escherichia	0	0	0	0	20862	SAMN07762808	67424	119	4385005	51.7974
SRR6174109	Escherichia	0	0	0	0	20862	SAMN07762891	93746	102	4519069	48.0833
SRR6174196	Escherichia	1	0	0	0	20862	SAMN07762838	33621	254	4336818	34.7929
SRR6174253	Escherichia	0	0	0	0	20862	SAMN07762972	109115	98	4450873	58.5631
SRR6174350	Escherichia	0	0	0	0	20862	SAMN07762953	4143	1433	4177450	17.6838
SRR6178087	Escherichia	0	0	0	0	20862	SAMN07717160	157599	152	5313902	87.637
SRR6184752	Escherichia	1	0	0	0	20862	SAMN07763295	51980	152	4295017	45.4114
SRR6184797	Escherichia	1	0	0	0	20862	SAMN07763008	98362	97	4530147	126.336
SRR6184927	Escherichia	2	0	0	0	20862	SAMN07763089	54885	162	4370963	38.9993
SRR6184959	Escherichia	0	0	0	0	20862	SAMN07763304	74856	130	4232819	65.2355
SRR6185002	Escherichia	1	0	0	0	20862	SAMN07763285	23432	331	4315092	38.4895
SRR6185090	Escherichia	0	0	0	0	20862	SAMN07763261	3818	1580	4156788	20.3954
SRR6185092	Escherichia	0	0	0	0	20862	SAMN07763262	34742	243	4509314	29.9749
SRR6185120	Escherichia	2	0	0	0	20862	SAMN07763178	21445	342	4494008	46.9422
SRR6185857	Escherichia	0	0	0	0	20862	SAMN07807512	51432	245	4781124	90.228
SRR6189737	Escherichia	0	0	0	0	20862	SAMN07792802	73754	262	5466148	36.1416
SRR6189746	Escherichia	0	0	0	0	20931	SAMN07788950	130230	111	5350690	88.1208
SRR6197816	Escherichia	0	0	0	0	20862	SAMN07819032	61508	249	5162252	136.257
SRR6207498	Escherichia	0	0	0	0	20862	SAMN07811848	158337	77	5275671	99.6194
SRR6207504	Escherichia	0	0	0	0	20931	SAMN07817117	145439	97	4941264	206.82
SRR6207507	Escherichia	1	0	0	0	20862	SAMN07818942	236144	158	5331714	73.1707
SRR6214533	Escherichia	1	0	0	0	20862	SAMN07767091	341161	50	5080984	63.0742
SRR6216410	Escherichia	0	0	0	0	20931	SAMN07823478	157974	138	5494757	64.9448
SRR6219409	Escherichia	0	0	0	0	20931	SAMN06669404	154604	77	4909107	109.517
SRR6219638	Escherichia	1	0	0	0	20862	SAMN07747774	181308	58	4700486	28.7815
SRR6219724	Escherichia	1	0	0	0	20931	SAMN07747806	140245	99	4849777	41.9442
SRR6224580	Escherichia	0	0	0	0	20862	SAMN07839400	174758	97	5284073	229.518
SRR6236864	Escherichia	1	0	0	0	20862	SAMN07738685	6535	1346	4950189	60.8903
SRR6238132	Escherichia	0	0	0	0	20862	SAMN07955773	109326	108	4894118	60.4344
SRR6241965	Escherichia	0	0	0	0	20931	SAMN07947601	54647	311	5418613	49.7698
SRR6242090	Escherichia	0	0	0	0	20862	SAMN07949767	148116	159	5290626	155.082
SRR6252843	Escherichia	0	0	0	0	20862	SAMN07964745	65709	255	5333997	111.24
SRR6252970	Escherichia	0	0	0	0	20862	SAMN07964739	63548	256	5297629	94.3308
SRR6252971	Escherichia	0	0	0	0	20862	SAMN07967185	201734	171	5375716	106.739
SRR6292791	Escherichia	0	0	0	0	20931	SAMN08025052	62249	159	4906551	158.578
SRR6292813	Escherichia	0	0	0	0	20931	SAMN08025055	61183	215	5076946	133.38
SRR6293184	Escherichia	0	0	0	0	20862	SAMN07982608	93738	207	5307704	86.1789
SRR6293214	Escherichia	0	0	0	0	20862	SAMN07976492	120686	106	5105381	96.5762
SRR6293236	Escherichia	1	0	0	0	20862	SAMN08004611	111176	220	5537837	85.8562
SRR6309941	Escherichia	0	0	0	0	20931	SAMN08040311	122411	178	5158566	47.9806
SRR6314306	Escherichia	0	0	0	0	20862	SAMN08051580	32959	307	5017994	109.184
SRR6321264	Escherichia	0	0	0	0	20862	SAMN08095803	109892	206	5408558	89.3871
SRR6321300	Escherichia	0	0	0	0	20862	SAMN08095883	183723	192	5428010	76.6694
SRR6321376	Escherichia	1	0	0	0	20862	SAMN08095814	135655	218	5252338	55.0572
SRR6337739	Escherichia	0	0	0	0	20862	SAMN07981394	136047	94	5148349	39.8187
SRR6361873	Escherichia	0	0	0	0	20862	SAMN08039908	53128	239	4831784	53.9718
SRR6361978	Escherichia	0	0	0	0	20862	SAMN08039457	149648	61	4790418	71.408
SRR6361992	Escherichia	11	1	8.02	4.85	20862	SAMN08039332	76334	242	5206337	66.9932
SRR6362018	Escherichia	0	0	0	0	20862	SAMN08039522	147386	95	4898602	57.0242
SRR6362047	Escherichia	11	1	11.74	5.29	20862	SAMN08039116	32413	344	4778311	65.7877
SRR6362073	Escherichia	0	0	0	0	20862	SAMN08039182	130135	71	4609855	98.0962
SRR6362107	Escherichia	0	0	0	0	20862	SAMN08039753	118614	77	4646234	85.9237
SRR6362238	Escherichia	0	0	0	0	20862	SAMN08039129	43747	254	4781862	96.4072
SRR6362289	Escherichia	1	0	0	0	20862	SAMN08039558	44312	237	4947318	102.832
SRR6362339	Escherichia	7	1	12.39	13.14	20862	SAMN08040009	101393	184	5234878	91.8702
SRR6362773	Escherichia	0	0	0	0	20862	SAMN08039093	32290	266	4457633	127.882
SRR6371738	Escherichia	0	0	0	0	20862	SAMN08153777	55323	314	5335815	78.2194
SRR6373602	Escherichia	0	0	0	0	20862	SAMN08167628	128174	99	5065795	160.997
SRR6374208	Escherichia	0	0	0	0	20862	SAMN07988997	207583	61	4712399	92.1481
SRR6385037	Escherichia	1	0	0	0	20862	SAMN08130254	65275	320	5466605	42.7084
SRR6386483	Escherichia	0	0	0	0	20934	SAMN08199346	226434	62	4815901	260.253
SRR6394416	Escherichia	1	0	0	0	20862	SAMN08211502	132446	76	4557600	54.6438
SRR6394465	Escherichia	2	0	0	0	20862	SAMN08211502	125451	85	4554271	49.1887
SRR6394470	Escherichia	0	0	0	0	20931	SAMN08211502	132898	79	4555441	49.7835
SRR6394616	NA	0	0	0	0	21285	SAMN08211502	0	0	0	-nan
SRR6394666	Escherichia	1	0	0	0	20862	SAMN08211502	132898	78	4554962	64.8445
SRR6396330	Escherichia	0	0	0	0	20862	SAMN08200284	81962	255	5463810	52.3591
SRR6412476	Escherichia	0	0	0	0	20862	SAMN05464518	185487	74	5073761	83.8586
SRR6425069	Escherichia	0	0	0	0	20862	SAMN08235525	52330	257	4995930	58.0922
SRR6426319	Escherichia	0	0	0	0	20862	SAMN08272744	156909	100	5225152	206.525
SRR6426347	Escherichia	0	0	0	0	20862	SAMN08272750	107765	137	5213243	157.313
SRR6426348	Escherichia	1	0	0	0	20931	SAMN08134313	207585	86	5128392	67.0345
SRR6426847	Escherichia	0	0	0	0	20862	SAMN08134309	179495	66	4935305	82.5469
SRR6427414	Escherichia	2	0	0	0	20862	SAMN04881307	91798	182	5446607	64.4498
SRR6438337	Escherichia	0	0	0	0	20862	SAMN08289305	99137	212	5414323	121.471
SRR6439853	Escherichia	0	0	0	0	20931	SAMN08226119	55528	318	5490609	74.5639
SRR6439962	Escherichia	0	0	0	0	20862	SAMN08284934	115802	201	5376336	68.3024
SRR6440054	Escherichia	0	0	0	0	20862	SAMN08237566	75365	228	4953555	227.002
SRR6440079	Escherichia	0	0	0	0	20862	SAMN08286620	50350	248	5304814	50.0526
SRR6456792	Escherichia	0	0	0	0	20931	SAMN08326086	87628	123	4984040	62.2791
SRR6484724	Escherichia	0	0	0	0	20862	SAMN08332011	84671	236	5427895	57.1723
SRR6487137	Escherichia	0	0	0	0	20862	SAMN08368732	207690	47	4821099	110.629
SRR6490581	Escherichia	1	0	0	0	20862	SAMN08379067	107673	112	5017137	201.954
SRR6505740	Escherichia	0	0	0	0	20862	SAMN08102586	21732	563	5213554	168.665
SRR6507008	Escherichia	0	0	0	0	20862	SAMN08159355	44168	6	118042	6147.67
SRR6512620	Escherichia	1	0	0	0	20862	SAMN08395901	44241	311	5266894	64.8863
SRR6555356	Escherichia	0	0	0	0	20862	SAMN08387196	84638	147	4857362	48.3685
SRR6656717	Escherichia	0	0	0	0	20862	SAMN08399393	135500	168	5230532	161.566
SRR6658323	Escherichia	0	0	0	0	20862	SAMN08432383	84377	243	5571086	64.6586
SRR6658331	Escherichia	0	0	0	0	20862	SAMN08434631	99806	185	5170530	99.4902
SRR6669342	Escherichia	0	0	0	0	20862	SAMN08462635	132898	76	4546864	257.399
SRR6680333	Escherichia	0	0	0	0	20862	SAMN06645914	66105	292	5412002	43.1105
SRR6685426	Escherichia	4	1	6.34	1.1	20862	SAMN04521937	68305	143	4643470	173.719
SRR6689543	Escherichia	0	0	0	0	20862	SAMN08499928	89634	201	5417474	50.8041
SRR6690757	Escherichia	0	0	0	0	20862	SAMN08501065	58892	288	5077247	55.4974
SRR6691212	Escherichia	0	0	0	0	20862	SAMN08438867	113902	211	5426854	63.2245
SRR6703044	Escherichia	1	0	0	0	20931	SAMN08513241	118709	134	5262179	62.1495
SRR6703108	Escherichia	0	0	0	0	20931	SAMN08432476	100847	255	5477669	63.1421
SRR6713430	Escherichia	0	0	0	0	20931	SAMN08522372	80367	160	5046684	189.548
SRR6724074	Escherichia	1	0	0	0	20862	SAMN08519218	147900	77	4837050	97.9545
SRR6743583	Escherichia	1	0	0	0	20931	SAMN08367616	102451	229	5422503	390.136
SRR6746220	Escherichia	3	1	6.41	1.41	20862	SAMN08542170	122706	186	5163924	146.773
SRR6764138	Escherichia	2	0	0	0	20862	SAMN07446218	31403	359	4882977	100.228
SRR6764140	Escherichia	0	0	0	0	20862	SAMN07444436	143399	93	5138023	237.006
SRR6764225	Escherichia	0	0	0	0	20931	SAMN08581899	118077	109	5073069	109.722
SRR6767318	Escherichia	1	0	0	0	20862	SAMN08595460	53621	295	5499261	57.0933
SRR6767323	Escherichia	0	0	0	0	20862	SAMN08595477	188305	164	5415837	75.0504
SRR6788247	Escherichia	0	0	0	0	20862	SAMN08611183	249050	57	4952883	150.133
SRR6788248	Escherichia	0	0	0	0	20862	SAMN04993195	112389	136	4972076	89.29
SRR6793304	Escherichia	2	0	0	0	20862	SAMN08611199	147758	82	4837105	104.324
SRR6793684	Escherichia	0	0	0	0	20931	SAMN08624233	97472	143	5040292	146.23
SRR6793855	Escherichia	0	0	0	0	20862	SAMN08623777	86502	149	4825314	210.399
SRR6799238	Escherichia	0	0	0	0	20862	SAMN08631056	187934	140	5445709	69.9527
SRR6799406	Escherichia	0	0	0	0	20862	SAMN07291514	147572	85	4733467	286.917
SRR6808964	Escherichia	0	0	0	0	20862	SAMN08638712	107263	213	5262233	47.022
SRR6809005	Escherichia	0	0	0	0	20931	SAMN08638732	54458	250	5325709	71.6569
SRR6809102	Escherichia	0	0	0	0	20862	SAMN08638527	109944	194	5281729	86.369
SRR6809156	Escherichia	0	0	0	0	20931	SAMN08638589	91568	231	5265202	89.585
SRR6821007	Escherichia	0	0	0	0	20862	SAMN08668393	132998	191	5270571	122.463
SRR6825083	Escherichia	1	0	0	0	20862	SAMN08685791	27281	445	5277538	124.396
SRR6825173	Escherichia	0	0	0	0	20862	SAMN08687014	123960	199	5376841	72.5282
SRR6827099	Escherichia	0	0	0	0	20862	SAMN06645790	88146	262	5429279	75.4406
SRR6843209	Escherichia	0	0	0	0	20862	SAMN08719218	129775	98	4950048	128.248
SRR6870725	Escherichia	2	0	0	0	20862	SAMN08744097	89133	237	5238052	50.5554
SRR6875524	Escherichia	0	0	0	0	20862	SAMN08767979	56174	269	5271264	58.561
SRR6885883	Escherichia	0	0	0	0	20931	SAMN08786235	63412	242	5270045	88.9325
SRR6891421	Escherichia	0	0	0	0	20862	SAMN08793043	83065	215	5151679	63.66
SRR6891470	Escherichia	2	0	0	0	20862	SAMN08793006	37724	363	5079068	82.5346
SRR6891491	Escherichia	0	0	0	0	20862	SAMN08792984	74276	292	5395055	86.4641
SRR6892691	Escherichia	0	0	0	0	20862	SAMN08783772	66061	198	4945544	31.9417
SRR6896684	Escherichia	1	0	0	0	20862	SAMN08795544	78203	258	5350103	118.72
SRR6900652	Salmonella	1	0	0	0	20862	SAMN08797821	232069	34	4694014	103.38
SRR6900730	Salmonella	0	0	0	0	20862	SAMN08797906	183315	52	4682438	55.8062
SRR6902863	Salmonella	0	0	0	0	20862	SAMN08799916	222924	76	4953156	102.455
SRR6919256	Salmonella	0	0	0	0	20862	SAMN08822609	164130	57	4812746	68.1525
SRR6920172	Salmonella	0	0	0	0	20862	SAMN08823329	194460	54	4689183	60.4922
SRR6922526	Salmonella	1	0	0	0	20862	SAMN08825426	164131	53	4690136	47.5382
SRR6927286	Escherichia	0	0	0	0	20862	SAMN08832934	99418	274	5509323	45.1984
SRR6940314	Salmonella	0	0	0	0	20862	SAMN08865443	161878	61	4697233	55.8066
SRR6940353	Escherichia	0	0	0	0	20862	SAMN08863904	169229	69	4732298	107.328
SRR6950050	Salmonella	1	0	0	0	20862	SAMN07135246	275510	47	4768926	90.7707
SRR6976755	Salmonella	0	0	0	0	20862	SAMN08904790	64120	152	4869868	113.036
SRR6979669	Escherichia	1	0	0	0	20862	SAMN08910005	97779	155	5069457	108.029
SRR6979751	Escherichia	1	0	0	0	20862	SAMN08910001	129146	159	5278551	86.0912
SRR6982833	Escherichia	1	0	0	0	20931	SAMN08915326	24160	384	4499365	62.2948
SRR7015191	Salmonella	0	0	0	0	20862	SAMN08943015	198185	54	4790877	98.7809
SRR7042020	Escherichia	0	0	0	0	20862	SAMN08943204	119017	100	4843435	85.6887
SRR7048468	Escherichia	0	0	0	0	20862	SAMN08963248	55420	313	5236966	94.2483
SRR7048475	Escherichia	0	0	0	0	20862	SAMN08963236	107813	266	5415498	39.7706
SRR7049749	Salmonella	0	0	0	0	20862	SAMN08964021	251953	33	4654222	66.4566
SRR7050059	Escherichia	1	0	0	0	20862	SAMN08964488	122271	193	5152458	102.867
SRR7050061	Escherichia	0	0	0	0	20862	SAMN08964480	90528	196	5113734	136.842
SRR7050090	Escherichia	0	0	0	0	20931	SAMN08964508	48402	263	5153956	99.0618
SRR7063324	Salmonella	0	0	0	0	20862	SAMN08981730	562429	30	4922912	112.97
SRR7063418	Salmonella	0	0	0	0	20862	SAMN08981791	115410	95	4682817	75.4404
SRR7063518	Salmonella	0	0	0	0	20862	SAMN08981882	111193	83	4718380	71.8098
SRR7064595	Escherichia	0	0	0	0	20862	SAMN08963883	43925	255	4983082	71.0445
SRR7064612	Escherichia	0	0	0	0	20931	SAMN08963946	98710	115	4842512	197.602
SRR7073004	Escherichia	0	0	0	0	20862	SAMN08110353	51642	284	5291354	42.6829
SRR7073048	Escherichia	0	0	0	0	20862	SAMN08994033	54736	318	5568078	66.9398
SRR7082093	Salmonella	0	0	0	0	20862	SAMN09001055	290026	24	4749297	107.431
SRR7084495	Escherichia	0	0	0	0	20862	SAMN09002910	78592	138	4657640	95.9122
SRR7085278	Salmonella	0	0	0	0	20862	SAMN08640195	341383	36	4932816	76.089
SRR7090698	Salmonella	0	0	0	0	20862	SAMN09009176	131993	81	4752417	80.1535
SRR7094064	Escherichia	0	0	0	0	20862	SAMN09012045	133162	146	5563796	88.8289
SRR7094163	Escherichia	0	0	0	0	20931	SAMN09012080	103785	209	5183880	40.1009
SRR7095842	Escherichia	0	0	0	0	20862	SAMN09013519	121580	104	5066962	153.82
SRR7095949	Escherichia	0	0	0	0	20931	SAMN09013512	226860	88	4996520	132.599
SRR7107026	Escherichia	2	0	0	0	20931	SAMN09060460	67777	266	5382061	55.5338
SRR7108627	Salmonella	10	1	8.31	3.03	20862	SAMN09060290	112138	76	4675525	53.5555
SRR7133082	Escherichia	0	0	0	0	20862	SAMN09092858	89131	244	5383464	56.6556
SRR7135415	Escherichia	5	1	8.56	2.94	20862	SAMN09074636	89928	154	5100121	105.841
SRR7138703	Salmonella	0	0	0	0	20862	SAMN09098835	77292	173	5020459	61.2801
SRR7145652	Escherichia	0	0	0	0	20862	SAMN09112634	119746	227	5376376	72.1655
SRR7155198	Escherichia	0	0	0	0	20931	SAMN09198368	106333	144	4926674	54.3256
SRR7155480	Salmonella	0	0	0	0	20862	SAMN09101802	83222	115	4823065	71.7533
SRR7155980	Salmonella	0	0	0	0	20862	SAMN09199042	99734	94	4934864	121.946
SRR7162808	Salmonella	0	0	0	0	20862	SAMN09206730	139761	60	4725184	88.8603
SRR7163933	Escherichia	0	0	0	0	20862	SAMN09207683	118585	209	5390450	57.1442
SRR7167737	Salmonella	0	0	0	0	20862	SAMN09211345	11702	690	4329070	65.5469
SRR7167744	Salmonella	0	0	0	0	20862	SAMN09211349	191993	74	4928375	84.4284
SRR7168461	Escherichia	0	0	0	0	20862	SAMN09014256	132160	155	5312389	208.157
SRR7170344	Salmonella	0	0	0	0	20862	SAMN09213212	46256	184	4836789	102.801
SRR7170357	Salmonella	1	0	0	0	20862	SAMN09213224	278672	47	4958292	113.859
SRR7170376	Salmonella	0	0	0	0	20862	SAMN09213247	663246	16	4702351	100.207
SRR7170389	Salmonella	0	0	0	0	20862	SAMN09213287	276883	25	4685182	111.935
SRR7170544	Salmonella	0	0	0	0	20862	SAMN09213346	78149	126	4942673	69.861
SRR7174321	Salmonella	0	0	0	0	20862	SAMN09217416	280500	30	4616269	44.9972
SRR7175039	Salmonella	0	0	0	0	20862	SAMN09217702	132300	72	4758793	32.8934
SRR7178111	Escherichia	0	0	0	0	20931	SAMN09220923	71177	269	5367581	48.0933
SRR7178179	Escherichia	0	0	0	0	20862	SAMN09221017	99170	248	5370534	132.452
SRR7178192	Escherichia	0	0	0	0	20862	SAMN09221015	123120	140	5299051	98.6666
SRR7178229	Escherichia	0	0	0	0	20862	SAMN09221052	146078	194	5462005	91.6218
SRR7178563	Salmonella	0	0	0	0	20862	SAMN09220821	110917	118	4939478	80.2236
SRR7179438	Salmonella	1	0	0	0	20862	SAMN09221919	153600	52	4783910	104.772
SRR7179858	Escherichia	0	0	0	0	20862	SAMN09222067	69509	203	4982844	64.0635
SRR7182366	Salmonella	0	0	0	0	20862	SAMN09223409	133828	69	4741265	100.356
SRR7184209	Escherichia	0	0	0	0	20862	SAMN09225214	91353	263	5231511	33.49
SRR7184213	Escherichia	0	0	0	0	20862	SAMN09225311	82640	218	5118057	39.962
SRR7184235	Escherichia	0	0	0	0	20862	SAMN09225354	18701	700	5256469	59.2016
SRR7185072	Salmonella	0	0	0	0	20862	SAMN08640172	107501	76	4890650	48.4957
SRR7185126	Escherichia	0	0	0	0	20862	SAMN08963881	12650	875	5232153	80.4271
SRR7186257	Salmonella	0	0	0	0	20862	SAMN08951165	310843	32	4632110	71.3759
SRR7187273	Salmonella	1	0	0	0	20862	SAMN09227995	63124	216	4587173	68.3141
SRR7187767	Escherichia	1	0	0	0	20862	SAMN09228494	76786	333	5325483	54.1663
SRR7187897	Salmonella	0	0	0	0	20862	SAMN09228615	189915	48	4687434	44.2671
SRR7187983	Salmonella	1	0	0	0	20862	SAMN09228864	222528	66	4960540	69.0322
SRR7188012	Salmonella	0	0	0	0	20862	SAMN09228889	177874	59	4661976	95.9734
SRR7192219	Salmonella	0	0	0	0	20862	SAMN09233702	175385	71	4820864	96.0937
SRR7193855	Salmonella	0	0	0	0	20862	SAMN09237773	665244	31	5063566	172.52
SRR7193858	Salmonella	0	0	0	0	20862	SAMN09237795	214266	47	4878281	76.7465
SRR7193904	Salmonella	0	0	0	0	20862	SAMN09237821	184322	73	4884195	57.5762
SRR7204044	Salmonella	0	0	0	0	20862	SAMN09243208	337516	33	4608443	117.569
SRR7204331	Salmonella	2	0	0	0	20865	SAMN09238742	157004	82	4832778	51.1684
SRR7204385	Salmonella	0	0	0	0	20862	SAMN09238809	121020	98	4814027	70.3817
SRR7204558	Salmonella	1	0	0	0	20862	SAMN09238951	157932	51	4558854	65.1377
SRR7204578	Salmonella	0	0	0	0	20862	SAMN09238934	34912	371	5066555	29.5381
SRR7204586	Salmonella	0	0	0	0	20862	SAMN09238919	252579	37	4728500	70.1004
SRR7204604	Salmonella	0	0	0	0	20862	SAMN09238921	50589	166	4677756	29.5113
SRR7208635	Escherichia	0	0	0	0	20862	SAMN09244099	76665	325	5684665	60.6343
SRR7209517	Salmonella	0	0	0	0	20862	SAMN09244221	139100	69	4659916	49.3143
SRR7209529	Salmonella	0	0	0	0	20862	SAMN09244404	153026	54	4687319	60.3373
SRR7211955	Escherichia	1	0	0	0	20862	SAMN09244785	11978	699	4800561	17.9504
SRR7211963	Escherichia	0	0	0	0	20862	SAMN09244790	31208	360	5074413	32.0895
SRR7213574	Escherichia	1	0	0	0	20862	SAMN09254081	109337	230	5574158	54.2476
SRR7215967	Salmonella	1	0	0	0	20862	SAMN09257884	80640	109	4742595	79.4998
SRR7216046	Salmonella	0	0	0	0	20862	SAMN09257909	106466	105	4935141	48.9424
SRR7218459	Salmonella	0	0	0	0	20862	SAMN09260756	116680	69	4566502	101.918
SRR7218466	Salmonella	0	0	0	0	20862	SAMN09260765	133084	75	4891385	101.006
SRR7218478	Salmonella	1	0	0	0	20862	SAMN09260808	762273	14	4704027	98.4318
SRR7218529	Salmonella	0	0	0	0	20862	SAMN09260890	178677	57	4716361	65.2702
SRR7218805	Salmonella	0	0	0	0	20862	SAMN09260950	676994	26	4736174	138.609
SRR7218864	Salmonella	0	0	0	0	20865	SAMN09260977	192033	69	5074413	81.2306
SRR7218866	Salmonella	0	0	0	0	20862	SAMN09260981	433291	25	4727711	93.2359
SRR7219097	Salmonella	0	0	0	0	20862	SAMN09260973	490745	22	4701668	48.1632
SRR7221041	Salmonella	0	0	0	0	20862	SAMN09259688	58871	144	4751827	128.867
SRR7221072	Salmonella	0	0	0	0	20862	SAMN09259700	52460	196	4907170	85.0616
SRR7221203	Escherichia	0	0	0	0	20862	SAMN09266777	76674	281	5414052	105.423
SRR7221237	Escherichia	1	0	0	0	20862	SAMN09266930	86034	274	5163391	57.5488
SRR7223188	Salmonella	0	0	0	0	20862	SAMN09268913	113562	74	4815931	34.5716
SRR7223191	Salmonella	0	0	0	0	20862	SAMN09268911	114908	66	4489232	73.7632
SRR7228876	Salmonella	0	0	0	0	20862	SAMN09274447	142054	70	4654750	76.8986
SRR7230169	Escherichia	0	0	0	0	20862	SAMN09276267	82594	231	5190758	30.52
SRR7230211	Escherichia	9	1	21.24	11.09	20862	SAMN09276271	29679	490	5354859	36.409
SRR7234484	Salmonella	0	0	0	0	20862	SAMN09281204	167927	58	4717530	88.9831
SRR7234598	Salmonella	1	0	0	0	20862	SAMN09281960	164019	52	4606368	78.7792
SRR7234620	Salmonella	0	0	0	0	20862	SAMN09281944	203259	43	4688831	76.8806
SRR7235702	Salmonella	0	0	0	0	20862	SAMN09283758	162204	55	4781526	65.5304
SRR7235917	Salmonella	0	0	0	0	20862	SAMN09283903	128278	74	5040959	92.1261
SRR7235952	Salmonella	0	0	0	0	20862	SAMN09283914	395244	36	4750039	94.4847
SRR7236640	Salmonella	0	0	0	0	20862	SAMN09284887	82700	121	4813863	29.6158
SRR7236646	Escherichia	0	0	0	0	20862	SAMN09284892	62026	164	4512668	80.3693
SRR7237492	Salmonella	0	0	0	0	20862	SAMN09285388	371913	39	4781633	108.087
SRR7244385	Salmonella	0	0	0	0	20862	SAMN09290480	186540	75	4922472	55.0716
SRR7245641	Salmonella	0	0	0	0	20862	SAMN09293613	82527	134	4709240	76.1652
SRR7246331	Salmonella	0	0	0	0	20865	SAMN09294276	280288	57	4685850	181.499
SRR7247779	Salmonella	0	0	0	0	20865	SAMN09294304	117928	115	4946731	109.851
SRR7249708	Salmonella	0	0	0	0	20862	SAMN09295027	1355	1453	1782616	10.8854
SRR7251040	Salmonella	0	0	0	0	20862	SAMN09298371	227674	44	4684637	69.2129
SRR7251112	Salmonella	0	0	0	0	20862	SAMN09298482	220225	46	4692084	62.8247
SRR7251550	Salmonella	0	0	0	0	20862	SAMN09302513	120870	111	4746646	61.007
SRR7251559	Salmonella	0	0	0	0	20862	SAMN09302532	231011	34	4590558	87.3051
SRR7253157	Salmonella	0	0	0	0	20862	SAMN09304692	403420	21	4599302	142.582
SRR7253174	Salmonella	0	0	0	0	20862	SAMN09305132	199780	48	4619342	106.503
SRR7253190	Salmonella	0	0	0	0	20862	SAMN09305250	363360	29	4721857	146.974
SRR7256996	Escherichia	0	0	0	0	20862	SAMN09346301	84321	271	5283713	56.0999
SRR7257040	Escherichia	0	0	0	0	20862	SAMN09346762	117700	124	5175182	96.8838
SRR7257123	Salmonella	1	0	0	0	20862	SAMN09348185	37990	226	4871961	26.4092
SRR7257424	Salmonella	0	0	0	0	20862	SAMN09350922	110989	76	4679073	49.9244
SRR7257429	Salmonella	0	0	0	0	20862	SAMN09350946	137050	95	4717407	52.4289
SRR7257478	Salmonella	0	0	0	0	20862	SAMN09352485	215309	49	4715875	85.9145
SRR7257483	Salmonella	1330	1	17.2	8.06	20862	SAMN09352380	145834	160	8633196	62.7375
SRR7257491	Salmonella	0	0	0	0	20862	SAMN09352484	145413	64	4595795	105.12
SRR7262558	Salmonella	2	0	0	0	20862	SAMN09262066	375222	31	4685164	67.5494
SRR7263026	Salmonella	1	0	0	0	20862	SAMN09358185	153496	55	4707367	76.6493
SRR7263181	Salmonella	0	0	0	0	20862	SAMN09361547	124135	77	4712348	131.748
SRR7265837	Escherichia	25	1	14.4	4.67	20862	SAMN09371712	49873	362	5267307	55.4502
SRR7265842	Escherichia	0	0	0	0	20862	SAMN09371664	134840	124	4983357	113.602
SRR7265951	Escherichia	0	0	0	0	20862	SAMN09371832	124148	193	5302368	111.125
SRR7267497	Salmonella	0	0	0	0	20862	SAMN09372512	183363	68	4964176	59.4673
SRR7269322	Salmonella	0	0	0	0	20862	SAMN09374828	405937	36	4765663	66.6081
SRR7269338	Salmonella	0	0	0	0	20862	SAMN09374873	233197	54	4758321	186.025
SRR7269368	Salmonella	0	0	0	0	20862	SAMN09374889	260677	51	4762027	94.8302
SRR7269394	Salmonella	0	0	0	0	20862	SAMN09374921	710978	22	4824988	164.279
SRR7269443	Salmonella	0	0	0	0	20862	SAMN09374955	247002	46	4723823	63.6024
SRR7269471	Salmonella	0	0	0	0	20862	SAMN09374984	165631	70	4834591	79.7186
SRR7269502	Salmonella	0	0	0	0	20862	SAMN09375014	214507	43	4691411	150.698
SRR7270900	Escherichia	0	0	0	0	20862	SAMN09375137	35491	236	4438994	213.378
SRR7270902	Escherichia	0	0	0	0	20862	SAMN09375139	36589	225	4442909	159.976
SRR7270933	Escherichia	0	0	0	0	20862	SAMN09373057	105469	98	4552106	81.3211
SRR7274983	Salmonella	0	0	0	0	20862	SAMN09377452	231757	41	4561894	57.47
SRR7274992	Salmonella	0	0	0	0	20862	SAMN09377451	98952	102	4904237	45.2415
SRR7275034	Salmonella	0	0	0	0	20862	SAMN09377493	145492	87	4736819	76.9225
SRR7277890	Salmonella	0	0	0	0	20862	SAMN09380524	149345	81	4938446	86.5901
SRR7278103	Salmonella	0	0	0	0	20862	SAMN09380586	155636	62	4942147	85.8498
SRR7278540	Escherichia	0	0	0	0	20862	SAMN09381032	201969	62	4927130	40.8598
SRR7278588	Escherichia	0	0	0	0	20862	SAMN09381116	56252	216	5059132	46.0945
SRR7278603	Escherichia	0	0	0	0	20862	SAMN09381103	70410	173	4952207	41.9573
SRR7280410	Escherichia	1	0	0	0	20862	SAMN09382186	178512	137	5325588	62.0782
SRR7280446	Escherichia	2	0	0	0	20862	SAMN09382215	80878	251	5498788	60.9195
SRR7280449	Escherichia	0	0	0	0	20862	SAMN09382213	76161	281	5550789	99.8765
SRR7280789	Escherichia	0	0	0	0	20931	SAMN09382753	139344	102	5188618	56.3336
SRR7283759	Escherichia	0	0	0	0	20862	SAMN09385860	117457	198	5585206	96.4556
SRR7284282	Salmonella	0	0	0	0	20862	SAMN09386271	96841	90	4682463	66.8184
SRR7284335	Salmonella	2	0	0	0	20862	SAMN09386414	155587	73	4774099	64.5188
SRR7284348	Salmonella	0	0	0	0	20862	SAMN09386425	189128	48	4680997	64.8676
SRR7284488	Salmonella	0	0	0	0	20862	SAMN09386516	236692	52	5002465	118.871
SRR7285411	Escherichia	0	0	0	0	20862	SAMN09387373	90292	140	5005674	40.2109
SRR7285444	Escherichia	0	0	0	0	20862	SAMN09387418	113077	187	5206441	72.5363
SRR7285619	Salmonella	0	0	0	0	20862	SAMN09387774	184894	40	4720824	56.6907
SRR7285743	Salmonella	0	0	0	0	20862	SAMN09387885	176002	47	4660313	66.4667
SRR7285747	Salmonella	23	1	22.44	5.38	20862	SAMN09387881	4895	1705	5242562	81.4249
SRR7285837	Salmonella	0	0	0	0	20862	SAMN09387981	161549	84	4929049	49.5236
SRR7285849	Salmonella	0	0	0	0	20862	SAMN09387971	144647	64	4746689	80.9347
SRR7285940	Salmonella	0	0	0	0	20862	SAMN09388074	134491	65	4872687	74.7847
SRR7286254	Escherichia	1	0	0	0	20862	SAMN09388407	26468	478	5109348	57.6409
SRR7286533	Escherichia	0	0	0	0	20862	SAMN09388548	55005	344	5331220	53.9548
SRR7286544	Escherichia	0	0	0	0	20862	SAMN09388554	64756	271	5317225	40.3292
SRR7286620	Escherichia	0	0	0	0	20862	SAMN09388631	34701	417	5316623	50.9093
SRR7286783	Salmonella	0	0	0	0	20862	SAMN09388784	165215	46	4781980	114.794
SRR7286822	Salmonella	0	0	0	0	20862	SAMN09388810	218312	45	4655885	89.0893
SRR7286975	Salmonella	0	0	0	0	20862	SAMN09388962	185133	69	4859607	406.352
SRR7288545	Salmonella	0	0	0	0	20862	SAMN09389817	197697	73	4936611	101.068
SRR7289179	Salmonella	0	0	0	0	20862	SAMN09390997	406409	24	4698997	85.344
SRR7291037	Escherichia	1	0	0	0	20862	SAMN09395413	69057	313	5244641	37.7275
SRR7291041	Escherichia	0	0	0	0	20862	SAMN09395401	123954	187	5305828	59.6063
SRR7291910	Escherichia	0	0	0	0	20862	SAMN09396548	124725	127	5038390	79.9717
SRR7291915	Escherichia	0	0	0	0	20862	SAMN09396538	110958	193	5310396	58.0583
SRR7291954	Escherichia	0	0	0	0	20862	SAMN09396587	80782	277	5347531	85.3697
SRR7292613	Salmonella	0	0	0	0	20862	SAMN09395805	115452	93	4677408	116.045
SRR7292658	Salmonella	1	0	0	0	20862	SAMN09396653	155165	57	4771128	73.042
SRR7292676	Salmonella	0	0	0	0	20862	SAMN09396663	216840	55	4852318	67.462
SRR7292950	Salmonella	0	0	0	0	20862	SAMN09396954	249724	40	4732717	117.433
SRR7292995	Salmonella	0	0	0	0	20862	SAMN09396985	56660	169	4864016	160.504
SRR7294511	Salmonella	0	0	0	0	20862	SAMN09399771	496517	24	4669943	76.6832
SRR7294513	Salmonella	0	0	0	0	20862	SAMN09399754	53217	171	4667666	38.2634
SRR7298367	Salmonella	0	0	0	0	20862	SAMN09404230	214251	44	4557655	99.3
SRR7298817	Salmonella	0	0	0	0	20862	SAMN09404313	180574	39	4557100	78.2239
SRR7298866	Citrobacter:Salmonella	0	1	NA	NA	0	SAMN09404374	6319	2812	7981631	49.0732
SRR7298871	Salmonella	0	0	0	0	20862	SAMN09404369	185107	54	4752460	95.912
SRR7299300	Salmonella	0	0	0	0	20862	SAMN09404712	178707	66	4933170	98.1118
SRR7299334	Salmonella	0	0	0	0	20862	SAMN09295238	58661	122	4668011	60.4945
SRR7300340	Salmonella	0	0	0	0	20862	SAMN09405364	113483	97	4944723	81.8148
SRR7300471	Escherichia	0	0	0	0	20862	SAMN09405490	123396	169	5141889	158.027
SRR7300510	Escherichia	0	0	0	0	20862	SAMN09405527	105719	206	5412778	72.0731
SRR7304241	Escherichia	2	0	0	0	20862	SAMN09405638	154363	81	4784063	90.9548
SRR7304379	Staphylococcus:Escherichia	0	1	NA	NA	0	SAMN09405679	119251	289	5314645	39.5195
SRR7304492	Escherichia	1	0	0	0	20862	SAMN09405727	159635	105	5167903	66.1829
SRR7310313	Salmonella	0	0	0	0	20862	SAMN09423120	204541	54	4701945	87.3195
SRR7310582	Salmonella	0	0	0	0	20862	SAMN09422738	146529	55	4685824	59.8838
SRR7310619	Salmonella	0	0	0	0	20862	SAMN09422618	174225	41	4515162	64.6378
SRR7344642	Salmonella	0	0	0	0	20862	SAMN09427249	104279	110	4745438	44.9293
SRR7346676	Salmonella	0	0	0	0	20862	SAMN09429220	166963	79	4718332	75.2335
SRR7346964	Salmonella	0	0	0	0	20862	SAMN09429301	181343	67	4841444	62.4388
SRR7348239	Salmonella	1	0	0	0	20862	SAMN09430481	186056	39	4652999	102.791
SRR7348310	Salmonella	0	0	0	0	20862	SAMN09430633	171006	48	4651226	66.0647
SRR7349210	Salmonella	0	0	0	0	20862	SAMN09431387	135299	55	4648024	50.673
SRR7349216	Salmonella	0	0	0	0	20862	SAMN09431382	44960	224	4549432	43.6219
SRR7349230	Salmonella	0	0	0	0	20862	SAMN09431401	97813	89	4673527	33.974
SRR7349263	Salmonella	0	0	0	0	20862	SAMN09431455	143969	54	4579219	85.7634
SRR7349334	Salmonella	0	0	0	0	20862	SAMN09431708	105440	82	4843547	118.269
SRR7349368	Salmonella	1	0	0	0	20862	SAMN09431706	203496	43	4687747	105.328
SRR7350598	Salmonella	0	0	0	0	20862	SAMN09433533	115308	68	4660796	52.7059
SRR7350716	Salmonella	0	0	0	0	20862	SAMN09433674	149419	88	4874424	60.9999
SRR7350774	Salmonella	0	0	0	0	20862	SAMN09433717	145280	82	4811736	109.876
SRR7350776	Salmonella	0	0	0	0	20862	SAMN09433710	225272	38	4686952	92.3034
SRR7350782	Salmonella	0	0	0	0	20862	SAMN09433718	89425	146	4663792	37.5655
SRR7350808	Salmonella	0	0	0	0	20862	SAMN09433751	139958	52	4603797	66.57
SRR7350827	Salmonella	1	0	0	0	20862	SAMN09433768	26920	361	4607973	145.311
SRR7350875	Salmonella	0	0	0	0	20862	SAMN09433806	186345	60	4789652	63.9226
SRR7351345	Salmonella	0	0	0	0	20862	SAMN09434844	174687	68	4725711	59.386
SRR7351419	Salmonella	0	0	0	0	20862	SAMN09434908	107184	89	4707225	35.1339
SRR7351421	Salmonella	0	0	0	0	20862	SAMN09434907	81120	95	4689306	95.0825
SRR7351453	Salmonella	0	0	0	0	20862	SAMN09434928	177298	57	4458864	62.5916
SRR7351576	Salmonella	0	0	0	0	20862	SAMN09435060	160581	55	4586823	133.616
SRR7352953	Salmonella	0	0	0	0	20862	SAMN09438034	105537	98	4968673	112.498
SRR7358040	Escherichia	0	0	0	0	20862	SAMN09444025	106193	153	4952423	63.976
SRR7358268	Escherichia	0	0	0	0	20862	SAMN09444089	127518	190	5392789	78.3681
SRR7358355	Salmonella	0	0	0	0	20862	SAMN09444336	223929	57	4917700	101.761
SRR7358372	Salmonella	5	1	9.96	1.43	20862	SAMN09444604	180825	48	4625230	72.3046
SRR7358954	Salmonella	0	0	0	0	20862	SAMN09445144	133133	76	4730843	134.184
SRR7359077	Salmonella	38	1	14.84	8.15	20862	SAMN09444823	25279	385	4685711	68.2271
SRR7359587	Salmonella	0	0	0	0	20862	SAMN09445422	271291	44	4962435	73.172
SRR7359593	Salmonella	0	0	0	0	20862	SAMN09445479	53658	150	4647803	51.5
SRR7359611	Salmonella	0	0	0	0	20862	SAMN09445482	175714	57	4676419	51.5297
SRR7363517	Salmonella	0	0	0	0	20862	SAMN09455513	60946	147	4830766	87.371
SRR7363587	Salmonella	0	0	0	0	20862	SAMN09455555	131554	96	4958418	62.4022
SRR7363593	Salmonella	0	0	0	0	20862	SAMN09455599	126097	77	4525978	54.6031
SRR7363630	Salmonella	0	0	0	0	20862	SAMN09455500	129418	77	4893738	101.536
SRR7367213	Escherichia	0	0	0	0	20862	SAMN09457220	109304	222	5277972	61.0802
SRR7367401	Escherichia	0	0	0	0	20862	SAMN09457655	105613	215	5494715	57.3853
SRR7367585	Escherichia	0	0	0	0	20862	SAMN09459091	104181	138	4955038	101.129
SRR7368863	Salmonella	0	0	0	0	20862	SAMN09459121	149333	67	4834284	64.5385
SRR7368883	Escherichia	28	1	10.45	3.11	20862	SAMN09459159	63271	295	5240359	89.2017
SRR7368913	Salmonella	0	0	0	0	20862	SAMN09459204	110214	101	4739940	31.5295
SRR7369076	Salmonella	0	0	0	0	20862	SAMN09459241	225474	41	4635638	100.192
SRR7369088	Salmonella	0	0	0	0	20862	SAMN09459307	157598	52	4687169	59.9629
SRR7379957	Salmonella	0	0	0	0	20862	SAMN09460820	194223	58	4981827	78.7116
SRR7379962	Salmonella	0	0	0	0	20862	SAMN09460815	203759	50	4960428	170.49
SRR7401618	Escherichia	0	0	0	0	20862	SAMN09462841	40500	386	5072350	46.6756
SRR7401647	Escherichia	12	1	11.33	3.26	20862	SAMN09462871	71828	221	5139293	65.6389
SRR7401721	Salmonella	0	0	0	0	20862	SAMN09463016	2437	2212	3977451	10.648
SRR7401735	Salmonella	1	0	0	0	20862	SAMN09463029	120154	87	4680901	52.7471
SRR7402047	Salmonella	0	0	0	0	20862	SAMN09243228	364635	49	4906838	40.9778
SRR7402370	Salmonella	0	0	0	0	20862	SAMN09463609	50723	176	4697591	51.2119
SRR7402424	Salmonella	0	0	0	0	20862	SAMN09463653	268299	59	4930841	85.3494
SRR7404723	Salmonella	1	0	0	0	20862	SAMN09243247	33820	242	4575219	60.8868
SRR7406082	Escherichia	0	0	0	0	20931	SAMN09462543	69364	215	5275810	256.652
SRR7408345	Salmonella	1	0	0	0	20862	SAMN09467924	183792	42	4547062	55.0558
SRR7408356	Salmonella	16	1	12.63	4.58	20862	SAMN09468135	112418	106	4707917	57.8517
SRR7410278	Salmonella	0	0	0	0	20862	SAMN09468806	197204	45	4782960	63.7136
SRR7410281	Salmonella	0	0	0	0	20862	SAMN09468750	279501	36	4726427	120.373
SRR7410301	Salmonella	0	0	0	0	20862	SAMN09468818	164036	93	4900984	107.938
SRR7410977	Salmonella	2	0	0	0	20862	SAMN02845768	71041	126	4929299	93.5383
SRR7413737	Salmonella	0	0	0	0	20862	SAMN09474334	368874	29	4838276	83.4442
SRR7413746	Salmonella	0	0	0	0	20862	SAMN09474313	489887	19	4693404	84.3982
SRR7414506	Escherichia	1	0	0	0	20862	SAMN09474588	90060	127	4901044	159.522
SRR7414562	Salmonella	0	0	0	0	20862	SAMN09474532	175975	50	4563248	82.5272
SRR7414648	Salmonella	1	0	0	0	20862	SAMN09474618	68561	129	4669043	94.5221
SRR7414785	Salmonella	0	0	0	0	20862	SAMN09474864	351615	31	4808835	112.007
SRR7414860	Salmonella	0	0	0	0	20862	SAMN09474879	275128	34	4692717	54.193
SRR7414894	Salmonella	0	0	0	0	20862	SAMN09474709	381288	30	4804305	108.413
SRR7414899	Salmonella	0	0	0	0	20862	SAMN09474916	358513	37	4803025	105.751
SRR7415062	Salmonella	0	0	0	0	20862	SAMN09475135	228583	42	4731723	62.3052
SRR7415131	Salmonella	0	0	0	0	20862	SAMN09475181	248207	34	4603457	126.252
SRR7416212	Salmonella	0	0	0	0	20862	SAMN09475844	143781	73	4856505	67.6196
SRR7416269	Salmonella	0	0	0	0	20862	SAMN09475882	51621	253	5017415	31.037
SRR7416324	Salmonella	0	0	0	0	20862	SAMN09475934	230485	38	4688309	70.5912
SRR7416368	Salmonella	0	0	0	0	20862	SAMN09475985	271117	39	4691085	85.5263
SRR7416430	Salmonella	0	0	0	0	20862	SAMN09476049	333737	34	4683161	109.403
SRR7417286	Salmonella	0	0	0	0	20862	SAMN09476455	231818	53	4775813	95.1182
SRR7419491	Salmonella	0	0	0	0	20862	SAMN09479059	203759	40	4614274	76.2657
SRR7419919	Salmonella	0	0	0	0	20862	SAMN09479538	79464	126	5004696	74.0866
SRR7426165	Salmonella	0	0	0	0	20862	SAMN08936636	278344	49	4930276	71.3939
SRR7426189	Salmonella	0	0	0	0	20862	SAMN08936748	553144	30	4810181	77.3986
SRR7426512	Salmonella	3	1	7.3	1.04	20862	SAMN09484140	183661	70	4834221	55.6468
SRR7427067	Salmonella	5	1	7.72	1.76	20862	SAMN09484566	226290	39	4558774	94.2212
SRR7430536	Escherichia	0	0	0	0	20931	SAMN09489322	103339	249	5544752	35.1932
SRR7439111	Escherichia	0	0	0	0	20931	SAMN09489762	91196	186	5377401	53.7285
SRR7439121	Escherichia	0	0	0	0	20931	SAMN09489516	87100	130	5238516	90.6235
SRR7439239	Salmonella	0	0	0	0	20862	SAMN08936678	162053	70	4908288	50.4696
SRR7439615	Salmonella	0	0	0	0	20862	SAMN09489572	257203	29	4609401	91.5534
SRR7442027	Salmonella	0	0	0	0	20862	SAMN09501208	110682	63	4626322	108.321
SRR7442134	Salmonella	1	0	0	0	20862	SAMN09501341	258714	39	4705267	60.0323
SRR7442214	Salmonella	0	0	0	0	20862	SAMN09501442	389304	24	4656903	49.9285
SRR7442282	Salmonella	1	0	0	0	20862	SAMN09500974	58362	153	4947730	81.1141
SRR7442284	Salmonella	0	0	0	0	20862	SAMN09501451	107255	82	4970757	64.1806
SRR7442288	Salmonella	0	0	0	0	20862	SAMN09501445	686822	21	4789869	100.727
SRR7443718	Escherichia	1	0	0	0	20862	SAMN09470531	185557	134	5262366	46.2948
SRR7443994	Salmonella	0	0	0	0	20862	SAMN09504298	128445	67	4587932	90.8491
SRR7444181	Salmonella	0	0	0	0	20862	SAMN09504436	152954	71	4680147	53.3531
SRR7444265	Salmonella	0	0	0	0	20862	SAMN09504736	160171	66	4748284	84.2126
SRR7447119	Salmonella	0	0	0	0	20862	SAMN09510577	176814	55	4553937	122.623
SRR7447127	Salmonella	0	0	0	0	20862	SAMN09510639	376532	35	4902057	99.859
SRR7447163	Salmonella	0	0	0	0	20862	SAMN09510632	236033	41	4720979	78.0569
SRR7447198	Salmonella	0	0	0	0	20862	SAMN09510676	132388	86	4835850	58.811
SRR7450553	Salmonella	0	0	0	0	20862	SAMN07246696	194508	61	4976948	130.241
SRR7450568	Salmonella	3	1	7.42	2.62	20862	SAMN07244559	194508	56	4959206	93.2959
SRR7450584	Salmonella	1	0	0	0	20862	SAMN08225205	245651	58	4974307	134.913
SRR7450794	Salmonella	1	0	0	0	20862	SAMN09515991	112604	64	4688506	50.711
SRR7450801	Salmonella	0	0	0	0	20862	SAMN09516020	79021	140	4924723	79.9308
SRR7451112	Salmonella	0	0	0	0	20862	SAMN09516240	170529	82	4961758	62.8252
SRR7451157	Salmonella	0	0	0	0	20862	SAMN09516406	165222	49	4791562	68.958
SRR7454831	Escherichia	0	0	0	0	20862	SAMN09519121	85437	233	5066980	34.547
SRR7456216	Salmonella	0	0	0	0	20862	SAMN07244895	181281	57	4944140	200.414
SRR7456275	Salmonella	0	0	0	0	20862	SAMN07244637	245651	55	4978436	130.537
SRR7456664	Salmonella	0	0	0	0	20862	SAMN09519708	367918	23	4701309	113.955
SRR7456710	Salmonella	0	0	0	0	20862	SAMN09519824	56349	165	4651442	23.1119
SRR7456725	Salmonella	1484	1	35.31	11.14	20862	SAMN09519863	32866	496	8316433	30.3036
SRR7456834	Salmonella	0	0	0	0	20862	SAMN09520653	181388	62	4799047	91.8934
SRR7456908	Salmonella	0	0	0	0	20862	SAMN09520761	159338	64	4895186	105.421
SRR7456951	Salmonella	3	1	6.64	0.55	20862	SAMN09520850	15369	610	4979841	60.1884
SRR7457120	Salmonella	1	0	0	0	20862	SAMN09520996	149419	83	5107352	88.1479
SRR7457135	Salmonella	0	0	0	0	20862	SAMN09520978	233096	38	4684985	121.646
SRR7458148	Salmonella	0	0	0	0	20862	SAMN09522036	130003	83	4943158	56.39
SRR7458575	Salmonella	25	1	6.31	1.35	20862	SAMN09530930	194289	46	4754919	72.2491
SRR7458614	Salmonella	0	0	0	0	20862	SAMN09530982	234724	37	4799507	110.895
SRR7458616	Salmonella	0	0	0	0	20862	SAMN09530979	86803	126	4484047	69.1075
SRR7458626	Salmonella	0	0	0	0	20862	SAMN09530991	174117	45	4555139	94.0943
SRR7458795	Salmonella	0	0	0	0	20862	SAMN09531147	283987	33	4726203	93.6117
SRR7463972	Salmonella	0	0	0	0	20862	SAMN09534146	470123	24	4700587	119.873
SRR7465069	Salmonella	0	0	0	0	20862	SAMN09534642	229129	39	4694437	56.332
SRR7466499	Salmonella	0	0	0	0	20862	SAMN09535913	237380	54	4892531	54.8234
SRR7466513	Salmonella	0	0	0	0	20862	SAMN09535901	727318	18	4764861	61.2747
SRR7466526	Salmonella	0	0	0	0	20862	SAMN09535936	713134	28	4929065	123.799
SRR7466527	Salmonella	0	0	0	0	20862	SAMN09535931	618147	27	4708283	42.3912
SRR7468897	Salmonella	0	0	0	0	20862	SAMN09557522	144740	64	4610658	77.3988
SRR7468994	Salmonella	0	0	0	0	20862	SAMN09564562	284009	39	4689123	68.7956
SRR7469147	Salmonella	1	0	0	0	20862	SAMN09566772	98046	120	4817032	75.7892
SRR7471102	Salmonella	0	0	0	0	20862	SAMN09601734	149577	86	4863162	47.2708
SRR7472865	Salmonella	0	0	0	0	20862	SAMN09604516	394076	29	4630000	148.956
SRR7472888	Salmonella	0	0	0	0	20862	SAMN09604568	301533	26	4690256	69.5364
SRR7472940	Salmonella	0	0	0	0	20862	SAMN09604557	377468	25	4654557	170.665
SRR7473051	Salmonella	2	0	0	0	20862	SAMN09604579	49656	203	4638434	82.828
SRR7474872	Salmonella	0	0	0	0	20862	SAMN09607563	225888	46	4775032	71.8299
SRR7474899	Salmonella	0	0	0	0	20862	SAMN09608372	196607	40	4693179	71.3936
SRR7475292	Salmonella	1	0	0	0	20862	SAMN09609496	152954	56	4680257	41.1786
SRR7475420	Salmonella	0	0	0	0	20862	SAMN09611813	87763	107	4848883	73.5435
SRR7480204	Salmonella	0	0	0	0	20862	SAMN09624126	129149	72	4683082	72.2973
SRR7480212	Salmonella	0	0	0	0	20862	SAMN09624127	144038	53	4685178	64.641
SRR7480274	Salmonella	0	0	0	0	20862	SAMN09624145	164230	54	4684586	94.736
SRR7480360	Salmonella	0	0	0	0	20862	SAMN09624373	168495	58	4714604	66.5221
SRR7480385	Salmonella	0	0	0	0	20862	SAMN09624390	104043	77	4691515	72.1499
SRR7480396	Salmonella	1	0	0	0	20862	SAMN09624408	145226	79	4849952	66.4413
SRR7480397	Salmonella	0	0	0	0	20862	SAMN09624416	107143	107	4903496	48.7048
SRR7480642	Salmonella	0	0	0	0	20862	SAMN09624487	350147	33	4697795	87.6071
SRR7494604	Salmonella	0	0	0	0	20862	SAMN09624559	83734	146	4955928	78.8953
SRR7495492	Salmonella	0	0	0	0	20862	SAMN09628583	164872	72	5112220	74.9595
SRR7495732	Salmonella	0	0	0	0	20862	SAMN09628809	360803	35	4688090	102.437
SRR7495790	Salmonella	0	0	0	0	20862	SAMN09628868	175510	38	4574089	107.168
SRR7495793	Salmonella	1	0	0	0	20862	SAMN09628884	322469	35	4760824	99.9531
SRR7495806	Salmonella	0	0	0	0	20862	SAMN09628878	183172	49	4771456	76.6735
SRR7498059	Salmonella	1	0	0	0	20862	SAMN04386840	96875	120	4754446	105.267
SRR7500573	Salmonella	0	0	0	0	20862	SAMN02844473	154019	83	4812684	57.0448
SRR7501302	Salmonella	0	0	0	0	20862	SAMN09634227	214501	45	4677961	46.5246
SRR7501406	Salmonella	0	0	0	0	20862	SAMN09634306	58215	149	4928573	25.545
SRR7501691	Salmonella	1	0	0	0	20862	SAMN09634544	83147	114	4965105	63.7189
SRR7501717	Salmonella	0	0	0	0	20862	SAMN09634573	122041	111	4945450	105.82
SRR7503319	Salmonella	0	0	0	0	20862	SAMN09604485	412560	23	4604277	36.6805
SRR7503322	Salmonella	0	0	0	0	20862	SAMN09604478	61959	123	4578123	125.545
SRR7504338	Salmonella	2	0	0	0	20862	SAMN09631575	326028	30	4698874	76.32
SRR7504631	Salmonella	0	0	0	0	20862	SAMN09636254	478748	22	4726491	85.4478
SRR7504633	Salmonella	0	0	0	0	20862	SAMN09636194	375943	28	4726516	117.15
SRR7504682	Salmonella	0	0	0	0	20862	SAMN09636299	206576	57	4690151	72.8346
SRR7504704	Salmonella	0	0	0	0	20862	SAMN09636330	145125	66	4924526	53.3272
SRR7504834	Salmonella	0	0	0	0	20862	SAMN09636663	473378	25	4803528	141.433
SRR7506718	Salmonella	0	0	0	0	20862	SAMN09631401	341618	28	4629708	63.5045
SRR7506882	Salmonella	1	0	0	0	20862	SAMN09638043	225906	43	4627044	87.9449
SRR7506970	Salmonella	0	0	0	0	20862	SAMN09638081	175726	58	4627113	67.7561
SRR7506971	Salmonella	0	0	0	0	20862	SAMN09638088	126592	75	4845775	93.7197
SRR7511744	Salmonella	1	0	0	0	20862	SAMN09643702	121946	60	4654754	49.8576
SRR7511837	Salmonella	0	0	0	0	20862	SAMN09643805	121568	80	4741170	57.4994
SRR7511881	Salmonella	0	0	0	0	20862	SAMN09643856	209585	52	4697292	60.2618
SRR7514726	Salmonella	0	0	0	0	20862	SAMN09650866	478498	22	4724524	70.5027
SRR7514740	Salmonella	0	0	0	0	20862	SAMN09650859	133166	62	4601503	73.8487
SRR7514785	Salmonella	0	0	0	0	20862	SAMN09650887	578340	25	4693868	87.9084
SRR7515379	Salmonella	0	0	0	0	20862	SAMN09650905	461161	23	4750105	124.909
SRR7516029	Salmonella	0	0	0	0	20862	SAMN09651388	96768	118	4941308	82.1519
SRR7516041	Salmonella	0	0	0	0	20862	SAMN09651403	57587	191	4797769	111.516
SRR7516693	Salmonella	0	0	0	0	20862	SAMN09652019	229234	37	4687459	67.093
SRR7518394	Salmonella	0	0	0	0	20862	SAMN09501167	177917	63	4731854	99.619
SRR7518642	Salmonella	0	0	0	0	20862	SAMN09655019	80118	100	4563046	53.9769
SRR7518685	Salmonella	1	0	0	0	20862	SAMN09655200	226880	48	4722287	56.3117
SRR7519523	Salmonella	1	0	0	0	20862	SAMN09655330	155328	53	4790867	70.5504
SRR7519527	Salmonella	1	0	0	0	20862	SAMN09655339	148670	73	4776396	37.7764
SRR7522916	Salmonella	0	0	0	0	20862	SAMN09658649	134896	386	5400703	62.1525
SRR7522952	Salmonella	0	0	0	0	20862	SAMN09658706	155839	49	4599011	113.833
SRR7523088	Salmonella	0	0	0	0	20862	SAMN09658757	159846	53	4644458	85.3524
SRR7523126	Salmonella	0	0	0	0	20862	SAMN09658761	178620	51	4706925	82.3456
SRR7523135	Salmonella	0	0	0	0	20862	SAMN09658779	148783	67	4867933	74.4356
SRR7523200	Salmonella	0	0	0	0	20862	SAMN09658854	280132	38	4683007	72.5099
SRR7523637	Salmonella	0	0	0	0	20862	SAMN09661721	45273	182	4712604	22.1665
SRR7523767	Salmonella	0	0	0	0	20862	SAMN09661852	91869	129	4967448	68.7592
SRR7524728	Salmonella	0	0	0	0	20862	SAMN09664732	111491	94	4618598	95.1388
SRR7524731	Salmonella	0	0	0	0	20862	SAMN09664733	80671	148	4922481	140.911
SRR7525559	Salmonella	0	0	0	0	20862	SAMN09634074	271032	51	4962628	113.589
SRR7527941	Salmonella	0	0	0	0	20862	SAMN09666316	46410	197	4899747	68.664
SRR7528111	Salmonella	0	0	0	0	20862	SAMN09666778	150492	78	4908114	42.7919
SRR7528158	Salmonella	2	0	0	0	20862	SAMN09666908	106727	104	5021076	79.9634
SRR7532604	Salmonella	0	0	0	0	20862	SAMN09671636	240287	81	4925458	36.5055
SRR7532609	Salmonella	0	0	0	0	20862	SAMN09671618	30669	295	4745855	51.6859
SRR7532752	Salmonella	0	0	0	0	20862	SAMN09681693	373486	31	4758279	65.8377
SRR7532757	Salmonella	0	0	0	0	20862	SAMN09681702	171336	55	4554255	126.12
SRR7533269	Salmonella	0	0	0	0	20862	SAMN09683607	175328	53	4797629	81.9278
SRR7533316	Salmonella	0	0	0	0	20862	SAMN09683641	356669	37	4881718	106.524
SRR7533359	Salmonella	0	0	0	0	20862	SAMN09683727	108185	85	4975696	71.8974
SRR7533534	Salmonella	0	0	0	0	20862	SAMN09684002	149619	77	4777379	48.9999
SRR7536743	Salmonella	0	0	0	0	20862	SAMN09689664	137177	85	4831081	80.9068
SRR7536802	Salmonella	0	0	0	0	20862	SAMN09689692	232320	29	4693540	104.821
SRR7538810	Salmonella	1	0	0	0	20862	SAMN09690809	149301	92	4931129	38.0693
SRR7538869	Salmonella	0	0	0	0	20862	SAMN09690881	148525	79	4725269	40.3419
SRR7538891	Salmonella	0	0	0	0	20862	SAMN09690898	194283	41	4684674	79.5019
SRR7545556	Salmonella	1	0	0	0	20862	SAMN09696074	278344	49	4938804	58.9895
SRR7545593	Salmonella	0	0	0	0	20862	SAMN09696095	659351	18	4666817	80.2317
SRR7545612	Salmonella	0	0	0	0	20862	SAMN09696083	139598	60	4733830	89.6908
SRR7551183	Salmonella	0	0	0	0	20862	SAMN09349573	109389	67	4747270	46.3799
SRR7588275	Salmonella	2	0	0	0	20862	SAMN09710448	177241	60	5003990	92.4764
SRR7588322	Salmonella	0	0	0	0	20862	SAMN09710522	49037	193	4699183	64.3168
SRR7601389	Salmonella	0	0	0	0	20862	SAMN09722379	266163	30	4708839	107.825
SRR7601445	Salmonella	2	0	0	0	20862	SAMN09722434	190896	69	4783118	81.3457
SRR7601463	Salmonella	1	0	0	0	20862	SAMN09722413	62263	101	4699963	68.2154
SRR7601539	Salmonella	0	0	0	0	20862	SAMN09722463	342216	45	4808824	112.002
SRR7608035	Salmonella	1	0	0	0	20862	SAMN09724272	487625	69	5207381	143.492
SRR7608277	Salmonella	0	0	0	0	20862	SAMN09724618	519835	26	4723182	145.101
SRR7608321	Salmonella	0	0	0	0	20862	SAMN09724636	380432	60	4982938	82.2808
SRR7610552	Salmonella	23	1	6.78	2.74	20862	SAMN09727023	703736	17	4583837	132.459
SRR7612078	Salmonella	0	0	0	0	20861	SAMN02698373	773815	17	4806888	120.429
SRR7615155	Salmonella	0	0	0	0	20862	SAMN09730253	49832	194	4725328	70.2182
SRR7620459	Salmonella	0	0	0	0	20862	SAMN09739459	474004	18	4807062	89.1672
SRR7627695	Salmonella	1	0	0	0	20862	SAMN09744734	128699	64	4696314	102.798
SRR7627744	Salmonella	0	0	0	0	20862	SAMN09744754	315005	25	4766795	167.744
SRR7627960	Salmonella	0	0	0	0	20862	SAMN09744769	243605	57	4728214	64.3948
SRR7628099	Salmonella	0	0	0	0	20862	SAMN09744910	227136	81	5291139	132.211
SRR7633233	Salmonella	0	0	0	0	20862	SAMN09754723	96866	77	4759395	145.529
SRR7633553	Salmonella	1	0	0	0	20862	SAMN09755195	209074	45	4762199	160.836
SRR7633996	Salmonella	0	0	0	0	20862	SAMN09755406	271504	49	4720356	131.813
SRR7634023	Salmonella	0	0	0	0	20862	SAMN09755481	728658	19	4778200	70.882
SRR7634024	Salmonella	0	0	0	0	20862	SAMN09755479	224431	53	4858909	64.0763
SRR7634234	Salmonella	0	0	0	0	20862	SAMN09745847	260721	36	4843502	80.6427
SRR7638256	Salmonella	0	0	0	0	20862	SAMN09756425	266944	53	5100773	60.0355
SRR7639104	Salmonella	0	0	0	0	20862	SAMN09761636	290049	39	4812564	71.0779
SRR7641813	Salmonella	0	0	0	0	20862	SAMN09763913	303125	32	4683792	117.487
SRR7642122	Salmonella	0	0	0	0	20862	SAMN09764246	182823	50	4940922	76.3173
SRR7643295	Salmonella	0	0	0	0	20862	SAMN09484382	142419	72	4927938	131.759
SRR7648351	Salmonella	0	0	0	0	20862	SAMN09755658	145223	72	4850690	53.369
SRR7648386	Salmonella	0	0	0	0	20862	SAMN09769396	348412	31	4670011	63.7705
SRR7648426	Salmonella	0	0	0	0	20862	SAMN09769405	126743	72	4720824	112.075
SRR7648470	Salmonella	0	0	0	0	20862	SAMN09769441	314266	37	4951929	117.51
SRR7653298	Salmonella	0	0	0	0	20862	SAMN09771022	185857	56	4950682	103.125
SRR7653332	Salmonella	1	0	0	0	20862	SAMN09770918	42589	186	4614761	30.071
SRR7653395	Salmonella	0	0	0	0	20862	SAMN09770959	712414	17	4663649	82.0807
SRR7653431	Salmonella	0	0	0	0	20862	SAMN09770987	187693	98	5416607	107.035
SRR7661100	Salmonella	0	0	0	0	20862	SAMN09784679	206526	62	4751887	133.007
SRR7661243	Salmonella	0	0	0	0	20862	SAMN09785188	76968	111	4775628	47.5803
SRR7661384	Salmonella	0	0	0	0	20862	SAMN09784488	126572	112	4993305	79.4119
SRR7664428	Salmonella	0	0	0	0	20862	SAMN09787893	135324	76	4717972	53.5541
SRR7664567	Salmonella	0	0	0	0	20862	SAMN09788028	353992	24	4693212	32.5279
SRR7664581	Salmonella	0	0	0	0	20862	SAMN09788043	191426	48	4803670	90.8027
SRR7665398	Salmonella	0	0	0	0	20862	SAMN09789018	782196	21	4723002	47.5926
SRR7667908	Salmonella	0	0	0	0	20862	SAMN09791518	64228	129	4688161	67.3239
SRR7667950	Salmonella	0	0	0	0	20865	SAMN09791502	54395	219	4649445	61.536
SRR7688268	Salmonella	0	0	0	0	20862	SAMN09813366	95667	85	4690557	57.0901
SRR7690624	Salmonella	0	0	0	0	20862	SAMN08640060	170738	55	4800766	130.33
SRR7691843	Salmonella	0	0	0	0	20862	SAMN09831532	47381	209	4651509	69.6222
SRR7695774	Salmonella	0	0	0	0	20862	SAMN09837286	244348	34	4658458	92.7955
SRR7697566	Salmonella	1	0	0	0	20862	SAMN09839261	122008	79	4568563	40.5066
SRR7701189	Salmonella	1	0	0	0	20862	SAMN09843249	526481	29	4609071	80.8613
SRR7701262	Salmonella	0	0	0	0	20862	SAMN09843288	114760	109	4774580	74.079
SRR7703091	Salmonella	0	0	0	0	20862	SAMN09843965	351401	28	4675088	119.817
SRR7703108	Salmonella	0	0	0	0	20862	SAMN09843977	201518	48	4587850	79.5781
SRR7703171	Salmonella	0	0	0	0	20862	SAMN09844219	466394	18	4693843	104.535
SRR7706221	Salmonella	0	0	0	0	20862	SAMN09848133	362966	29	4663494	141.441
SRR7706235	Salmonella	0	0	0	0	20862	SAMN09848135	305083	31	4943760	118.317
SRR7706286	Salmonella	0	0	0	0	20862	SAMN09848169	76843	100	4746512	50.4845
SRR7706433	Salmonella	0	0	0	0	20862	SAMN09848248	224053	58	4807527	83.7217
SRR7719504	Salmonella	0	0	0	0	20862	SAMN09862783	118458	80	4944804	96.2008
SRR7721727	Salmonella	0	0	0	0	20862	SAMN09862971	272791	38	4667064	66.5588
SRR7728042	Salmonella	0	0	0	0	20862	SAMN09872791	300729	31	4718998	39.9318
SRR7739569	Salmonella	0	0	0	0	20862	SAMN09880442	246349	36	4726141	65.5516
SRR7739626	Salmonella	0	0	0	0	20862	SAMN09880508	242627	57	4646584	32.4093
SRR7739642	Salmonella	0	0	0	0	20862	SAMN09880515	385206	23	4551116	83.1736
SRR7739786	Salmonella	0	0	0	0	20862	SAMN09881601	232367	43	4692058	56.1178
SRR7741006	Salmonella	0	0	0	0	20862	SAMN09881884	396443	26	4608985	133.788
SRR7746954	Salmonella	1	0	0	0	20862	SAMN09905728	106732	90	4691483	59.5027
SRR7746977	Salmonella	0	0	0	0	20862	SAMN09905741	313935	35	4826416	92.6432
SRR7750701	Salmonella	0	0	0	0	20862	SAMN09908951	334620	32	4587549	80.4957
SRR7750772	Salmonella	1	0	0	0	20862	SAMN09909042	123921	83	4998255	92.4836
SRR7750786	Salmonella	0	0	0	0	20862	SAMN09909051	69066	122	4823737	91.2521
SRR7754609	Salmonella	0	0	0	0	20862	SAMN09914098	37707	239	4611946	112.996
SRR7762749	Salmonella	1	0	0	0	20862	SAMN09928078	166041	65	5042031	101.016
SRR7762754	Salmonella	0	0	0	0	20862	SAMN09928080	299327	33	4531567	94.3249
SRR7763261	Salmonella	0	0	0	0	20862	SAMN09928128	65319	109	4851675	124.808
SRR7765210	Salmonella	23	1	11.21	3.01	20862	SAMN09850833	47162	277	4615072	71.2172
SRR7767049	Salmonella	1	0	0	0	20862	SAMN09933866	101321	95	4517090	73.8181
SRR7767221	Salmonella	0	0	0	0	20862	SAMN09933975	181291	46	4691226	54.7368
SRR7767284	Salmonella	0	0	0	0	20862	SAMN09933992	169709	43	4591045	95.9613
SRR7767324	Salmonella	0	0	0	0	20862	SAMN09934045	255512	42	4730902	77.6777
SRR7767374	Salmonella	1	0	0	0	20862	SAMN09934092	441374	23	4692810	40.8202
SRR7771650	Salmonella	1	0	0	0	20862	SAMN02918977	28175	306	4787315	39.6697
SRR7773301	Salmonella	0	0	0	0	20862	SAMN09941007	544863	23	4556893	73.0036
SRR7773310	Salmonella	0	0	0	0	20862	SAMN09941031	56698	159	4726546	90.0701
SRR7773554	Salmonella	0	0	0	0	20862	SAMN09941177	278447	48	5005684	66.1191
SRR7773562	Salmonella	0	0	0	0	20862	SAMN09941142	490074	24	4726811	60.8029
SRR7783941	Salmonella	0	0	0	0	20862	SAMN09952602	135980	64	4703450	99.1305
SRR7783951	Salmonella	0	0	0	0	20862	SAMN09952581	385799	30	4658871	102.512
SRR7786681	Salmonella	0	0	0	0	20862	SAMN09951450	172571	57	4675121	72.8315
SRR7789430	Salmonella	0	0	0	0	20862	SAMN09980137	187162	60	4931464	94.7937
SRR7789830	Salmonella	0	0	0	0	20862	SAMN09981117	91086	120	4731000	108.678
SRR7802719	Salmonella	0	0	0	0	20862	SAMN09989591	65496	162	4660321	69.9649
SRR7803545	Salmonella	0	0	0	0	20862	SAMN09990261	70321	117	4747118	70.1756
SRR7803553	Salmonella	0	0	0	0	20862	SAMN09990300	193790	48	4483068	88.1145
SRR7803899	Salmonella	0	0	0	0	20862	SAMN09990393	407820	27	4481970	51.3562
SRR7803941	Salmonella	0	0	0	0	20862	SAMN09990406	225555	47	4793788	102.13
SRR7810083	Salmonella	0	0	0	0	20862	SAMN09994485	98429	89	4715496	81.4925
SRR7811525	Salmonella	0	0	0	0	20862	SAMN10023670	268013	36	4690392	109.084
SRR7820779	Salmonella	0	0	0	0	20862	SAMN10037102	489473	23	4725379	136.798
SRR7820783	Salmonella	0	0	0	0	20862	SAMN10037100	461240	28	4724108	81.9805
SRR7820797	Salmonella	0	0	0	0	20862	SAMN10037152	49973	183	4815397	51.1363
SRR7820846	Salmonella	0	0	0	0	20862	SAMN10037201	278344	52	5035002	61.2645
SRR7820891	Salmonella	0	0	0	0	20862	SAMN10037249	299278	33	4792206	172.199
SRR7823357	Salmonella	0	0	0	0	20862	SAMN10033092	178204	67	4969074	206.16
SRR7825951	Salmonella	0	0	0	0	20862	SAMN09927954	129978	68	4518294	143.268
SRR7828254	Salmonella	22	1	17.45	8.69	20862	SAMN10058535	59098	205	4835215	90.1709
SRR7828278	Salmonella	0	0	0	0	20862	SAMN10058589	207083	52	4664751	78.5509
SRR7828307	Salmonella	0	0	0	0	20862	SAMN10058604	222308	76	4925072	79.9802
SRR7828324	Salmonella	0	0	0	0	20862	SAMN10058614	213926	59	4907309	119.913
SRR7828494	Salmonella	0	0	0	0	20862	SAMN10058765	166548	55	4736052	78.0002
SRR7828497	Salmonella	286	1	8.04	3.87	20862	SAMN10058763	320454	45	4697110	66.2299
SRR7830513	Salmonella	0	0	0	0	20862	SAMN10061289	256358	49	4866009	130.097
SRR7830554	Salmonella	0	0	0	0	20862	SAMN10061364	119808	65	4696273	111.088
SRR7830558	Salmonella	0	0	0	0	20862	SAMN10061375	99747	94	4944162	83.1034
SRR7830601	Salmonella	0	0	0	0	20862	SAMN10061393	250003	39	4690219	83.6668
SRR7836313	Salmonella	0	0	0	0	20862	SAMN10064111	128600	79	4713195	102.039
SRR7836315	Salmonella	0	0	0	0	20862	SAMN10064107	322331	37	4739575	105.034
SRR7842635	Salmonella	1	0	0	0	20862	SAMN10069064	160044	57	4867975	61.9039
SRR7842658	Salmonella	0	0	0	0	20862	SAMN10069058	178490	58	4889333	145.255
SRR7842680	Salmonella	0	0	0	0	20862	SAMN10069087	171918	74	4906320	138.302
SRR7850516	Salmonella	0	0	0	0	20862	SAMN10076029	336604	31	4689519	104.441
SRR7850675	Salmonella	0	0	0	0	20862	SAMN10076181	250500	32	4696381	96.2496
SRR7850691	Salmonella	0	0	0	0	20862	SAMN10076199	206111	54	4700254	139.467
SRR7850697	Salmonella	0	0	0	0	20862	SAMN10076208	212946	58	4909389	132.791
SRR7857537	Salmonella	0	0	0	0	20862	SAMN10079191	275384	40	4577462	65.7515
SRR7865573	Salmonella	0	0	0	0	20862	SAMN10079508	115790	75	4752325	119.762
SRR7873892	Salmonella	0	0	0	0	20862	SAMN10086924	164004	88	4866911	47.4021
SRR7873909	Salmonella	0	0	0	0	20862	SAMN10086998	214413	71	4706082	87.5213
SRR7873938	Salmonella	27	1	26.47	8.37	20862	SAMN10087064	4726	1653	5160650	48.7883

## Sheet: Table S5 Coverage Dataset
Sample	Genus	NumContamSNVs	ContamStatus	PercentContam	PercentContamStandardDeviation	BasesExamined
NC_002695_100_HS25_clean	Escherichia	0	False	0	0	20865
NC_002695_100_MSv1_clean	Escherichia	0	False	0	0	20865
NC_002695_200_HS25_clean	Escherichia	0	False	0	0	20865
NC_002695_200_MSv1_clean	Escherichia	0	False	0	0	20865
NC_002695_300_HS25_clean	Escherichia	0	False	0	0	20865
NC_002695_300_MSv1_clean	Escherichia	0	False	0	0	20865		NOTE: Sample names are in format Accession_1_Accession_2_ContaminationLevel_Coverage_Platform. If sample is uncontaminated, format is Accession_Coverage_Platform_clean. HS25 represents HiSeq 2500, 150bp reads, MSv1 represents Miseq with 250 bp reads.
NC_002695_400_HS25_clean	Escherichia	0	False	0	0	20865
NC_002695_400_MSv1_clean	Escherichia	0	False	0	0	20865
NC_002695_500_HS25_clean	Escherichia	0	False	0	0	20865
NC_002695_500_MSv1_clean	Escherichia	0	False	0	0	20865
NC_002695_50_HS25_clean	Escherichia	0	False	0	0	20865
NC_002695_50_MSv1_clean	Escherichia	0	False	0	0	20865
NC_002695_NC_000913_0.05_100_HS25	Escherichia	12	True	7.25	1.43	20865
NC_002695_NC_000913_0.05_100_MSv1	Escherichia	16	True	7.37	2.31	20865
NC_002695_NC_000913_0.05_200_HS25	Escherichia	14	True	7.59	3	20865
NC_002695_NC_000913_0.05_200_MSv1	Escherichia	12	True	7.77	1.86	20865
NC_002695_NC_000913_0.05_300_HS25	Escherichia	17	True	7.49	1.57	20865
NC_002695_NC_000913_0.05_300_MSv1	Escherichia	13	True	6.58	1.37	20865
NC_002695_NC_000913_0.05_400_HS25	Escherichia	15	True	5.95	1.69	20865
NC_002695_NC_000913_0.05_400_MSv1	Escherichia	15	True	6.75	3.03	20865
NC_002695_NC_000913_0.05_500_HS25	Escherichia	15	True	6.41	2.28	20865
NC_002695_NC_000913_0.05_500_MSv1	Escherichia	13	True	6.04	2.38	20865
NC_002695_NC_000913_0.05_50_HS25	Escherichia	12	True	11.11	3.79	20865
NC_002695_NC_000913_0.05_50_MSv1	Escherichia	7	True	8.89	3.36	20865
NC_002695_NC_000913_0.1_100_HS25	Escherichia	27	True	11.86	4.29	20865
NC_002695_NC_000913_0.1_100_MSv1	Escherichia	23	True	11.1	4.64	20865
NC_002695_NC_000913_0.1_200_HS25	Escherichia	27	True	11.01	3.61	20865
NC_002695_NC_000913_0.1_200_MSv1	Escherichia	27	True	10.61	2.99	20865
NC_002695_NC_000913_0.1_300_HS25	Escherichia	29	True	10.33	3.17	20865
NC_002695_NC_000913_0.1_300_MSv1	Escherichia	29	True	10.63	4.78	20865
NC_002695_NC_000913_0.1_400_HS25	Escherichia	26	True	9.31	2.79	20865
NC_002695_NC_000913_0.1_400_MSv1	Escherichia	27	True	9.01	2.91	20865
NC_002695_NC_000913_0.1_500_HS25	Escherichia	28	True	9.85	2.97	20865
NC_002695_NC_000913_0.1_500_MSv1	Escherichia	30	True	8.02	3.69	20865
NC_002695_NC_000913_0.1_50_HS25	Escherichia	22	True	14	6.4	20865
NC_002695_NC_000913_0.1_50_MSv1	Escherichia	17	True	9.62	4.67	20865
NC_002695_NC_000913_0.2_100_HS25	Escherichia	30	True	18.3	9.07	20865
NC_002695_NC_000913_0.2_100_MSv1	Escherichia	30	True	17.13	5.28	20865
NC_002695_NC_000913_0.2_200_HS25	Escherichia	30	True	18.36	5.99	20865
NC_002695_NC_000913_0.2_200_MSv1	Escherichia	29	True	19.82	5.68	20865
NC_002695_NC_000913_0.2_300_HS25	Escherichia	30	True	18.43	6.03	20865
NC_002695_NC_000913_0.2_300_MSv1	Escherichia	30	True	19.7	5.62	20865
NC_002695_NC_000913_0.2_400_HS25	Escherichia	30	True	19.33	4.53	20865
NC_002695_NC_000913_0.2_400_MSv1	Escherichia	30	True	19.57	6.93	20865
NC_002695_NC_000913_0.2_500_HS25	Escherichia	29	True	21.23	5.04	20865
NC_002695_NC_000913_0.2_500_MSv1	Escherichia	30	True	18.26	6.49	20865
NC_002695_NC_000913_0.2_50_HS25	Escherichia	29	True	21.72	8.4	20862
NC_002695_NC_000913_0.2_50_MSv1	Escherichia	27	True	20.34	9.63	20865
NC_002695_NC_011353_0.05_100_HS25	Escherichia	2	False	0	0	20865
NC_002695_NC_011353_0.05_100_MSv1	Escherichia	1	False	0	0	20865
NC_002695_NC_011353_0.05_200_HS25	Escherichia	0	False	0	0	20865
NC_002695_NC_011353_0.05_200_MSv1	Escherichia	1	False	0	0	20865
NC_002695_NC_011353_0.05_300_HS25	Escherichia	0	False	0	0	20865
NC_002695_NC_011353_0.05_300_MSv1	Escherichia	0	False	0	0	20865
NC_002695_NC_011353_0.05_400_HS25	Escherichia	1	False	0	0	20865
NC_002695_NC_011353_0.05_400_MSv1	Escherichia	1	False	0	0	20865
NC_002695_NC_011353_0.05_500_HS25	Escherichia	1	False	0	0	20865
NC_002695_NC_011353_0.05_500_MSv1	Escherichia	2	False	0	0	20865
NC_002695_NC_011353_0.05_50_HS25	Escherichia	0	False	0	0	20862
NC_002695_NC_011353_0.05_50_MSv1	Escherichia	1	False	0	0	20865
NC_002695_NC_011353_0.1_100_HS25	Escherichia	2	False	0	0	20865
NC_002695_NC_011353_0.1_100_MSv1	Escherichia	1	False	0	0	20865
NC_002695_NC_011353_0.1_200_HS25	Escherichia	2	False	0	0	20865
NC_002695_NC_011353_0.1_200_MSv1	Escherichia	1	False	0	0	20865
NC_002695_NC_011353_0.1_300_HS25	Escherichia	1	False	0	0	20865
NC_002695_NC_011353_0.1_300_MSv1	Escherichia	2	False	0	0	20865
NC_002695_NC_011353_0.1_400_HS25	Escherichia	1	False	0	0	20865
NC_002695_NC_011353_0.1_400_MSv1	Escherichia	2	False	0	0	20865
NC_002695_NC_011353_0.1_500_HS25	Escherichia	1	False	0	0	20865
NC_002695_NC_011353_0.1_500_MSv1	Escherichia	2	False	0	0	20865
NC_002695_NC_011353_0.1_50_HS25	Escherichia	2	False	0	0	20862
NC_002695_NC_011353_0.1_50_MSv1	Escherichia	1	False	0	0	20865
NC_002695_NC_011353_0.2_100_HS25	Escherichia	1	False	0	0	20865
NC_002695_NC_011353_0.2_100_MSv1	Escherichia	2	False	0	0	20865
NC_002695_NC_011353_0.2_200_HS25	Escherichia	2	False	0	0	20865
NC_002695_NC_011353_0.2_200_MSv1	Escherichia	2	False	0	0	20865
NC_002695_NC_011353_0.2_300_HS25	Escherichia	2	False	0	0	20865
NC_002695_NC_011353_0.2_300_MSv1	Escherichia	2	False	0	0	20865
NC_002695_NC_011353_0.2_400_HS25	Escherichia	2	False	0	0	20865
NC_002695_NC_011353_0.2_400_MSv1	Escherichia	2	False	0	0	20865
NC_002695_NC_011353_0.2_500_HS25	Escherichia	2	False	0	0	20865
NC_002695_NC_011353_0.2_500_MSv1	Escherichia	2	False	0	0	20865
NC_002695_NC_011353_0.2_50_HS25	Escherichia	2	False	0	0	20865
NC_002695_NC_011353_0.2_50_MSv1	Escherichia	2	False	0	0	20865
NC_002695_NC_011750_0.05_100_HS25	Escherichia	17	True	8.89	3.45	20865
NC_002695_NC_011750_0.05_100_MSv1	Escherichia	9	True	8.73	4.55	20865
NC_002695_NC_011750_0.05_200_HS25	Escherichia	15	True	6.7	1.6	20865
NC_002695_NC_011750_0.05_200_MSv1	Escherichia	16	True	6.43	1.36	20865
NC_002695_NC_011750_0.05_300_HS25	Escherichia	15	True	6.97	2.01	20865
NC_002695_NC_011750_0.05_300_MSv1	Escherichia	10	True	6.05	1.11	20865
NC_002695_NC_011750_0.05_400_HS25	Escherichia	14	True	4.82	3.17	20865
NC_002695_NC_011750_0.05_400_MSv1	Escherichia	14	True	6.04	2.11	20865
NC_002695_NC_011750_0.05_500_HS25	Escherichia	15	True	6.46	2.05	20865
NC_002695_NC_011750_0.05_500_MSv1	Escherichia	21	True	6.37	2.56	20865
NC_002695_NC_011750_0.05_50_HS25	Escherichia	14	True	9.5	3.49	20865
NC_002695_NC_011750_0.05_50_MSv1	Escherichia	12	True	11.59	5.64	20865
NC_002695_NC_011750_0.1_100_HS25	Escherichia	26	True	10.93	3.45	20862
NC_002695_NC_011750_0.1_100_MSv1	Escherichia	29	True	13.38	6.54	20865
NC_002695_NC_011750_0.1_200_HS25	Escherichia	28	True	9.58	3.59	20865
NC_002695_NC_011750_0.1_200_MSv1	Escherichia	27	True	10.89	3.72	20865
NC_002695_NC_011750_0.1_300_HS25	Escherichia	30	True	10.69	3.02	20865
NC_002695_NC_011750_0.1_300_MSv1	Escherichia	31	True	9.3	3.65	20865
NC_002695_NC_011750_0.1_400_HS25	Escherichia	31	True	10.13	3.22	20865
NC_002695_NC_011750_0.1_400_MSv1	Escherichia	28	True	9.9	3.6	20865
NC_002695_NC_011750_0.1_500_HS25	Escherichia	31	True	9.6	2.8	20865
NC_002695_NC_011750_0.1_500_MSv1	Escherichia	30	True	9.5	2.88	20865
NC_002695_NC_011750_0.1_50_HS25	Escherichia	15	True	10.68	4.02	20865
NC_002695_NC_011750_0.1_50_MSv1	Escherichia	21	True	13.25	5.57	20865
NC_002695_NC_011750_0.2_100_HS25	Escherichia	30	True	20.88	6.82	20865
NC_002695_NC_011750_0.2_100_MSv1	Escherichia	31	True	17.8	5.8	20865
NC_002695_NC_011750_0.2_200_HS25	Escherichia	32	True	18.65	4.79	20865
NC_002695_NC_011750_0.2_200_MSv1	Escherichia	31	True	17.33	6.43	20865
NC_002695_NC_011750_0.2_300_HS25	Escherichia	32	True	17.45	7	20865
NC_002695_NC_011750_0.2_300_MSv1	Escherichia	32	True	18.65	6.73	20865
NC_002695_NC_011750_0.2_400_HS25	Escherichia	32	True	18.2	7.16	20865
NC_002695_NC_011750_0.2_400_MSv1	Escherichia	32	True	18.4	5.17	20865
NC_002695_NC_011750_0.2_500_HS25	Escherichia	32	True	19.11	4.59	20865
NC_002695_NC_011750_0.2_500_MSv1	Escherichia	32	True	19.08	6.33	20865
NC_002695_NC_011750_0.2_50_HS25	Escherichia	27	True	18.46	8.8	20865
NC_002695_NC_011750_0.2_50_MSv1	Escherichia	26	True	17.59	5.59	20865
NC_002973_100_HS25_clean	Listeria	0	False	0	0	20181
NC_002973_100_MSv1_clean	Listeria	0	False	0	0	20181
NC_002973_200_HS25_clean	Listeria	0	False	0	0	20181
NC_002973_200_MSv1_clean	Listeria	0	False	0	0	20181
NC_002973_300_HS25_clean	Listeria	0	False	0	0	20181
NC_002973_300_MSv1_clean	Listeria	0	False	0	0	20181
NC_002973_400_HS25_clean	Listeria	0	False	0	0	20181
NC_002973_400_MSv1_clean	Listeria	0	False	0	0	20181
NC_002973_500_HS25_clean	Listeria	0	False	0	0	20181
NC_002973_500_MSv1_clean	Listeria	0	False	0	0	20181
NC_002973_50_HS25_clean	Listeria	0	False	0	0	20181
NC_002973_50_MSv1_clean	Listeria	1	False	0	0	20181
NC_002973_NC_012488_0.05_100_HS25	Listeria	8	True	8.65	2.88	20181
NC_002973_NC_012488_0.05_100_MSv1	Listeria	10	True	7.88	3.11	20181
NC_002973_NC_012488_0.05_200_HS25	Listeria	7	True	6.7	0.82	20181
NC_002973_NC_012488_0.05_200_MSv1	Listeria	4	True	6.68	1.41	20181
NC_002973_NC_012488_0.05_300_HS25	Listeria	4	True	5.91	0.87	20181
NC_002973_NC_012488_0.05_300_MSv1	Listeria	3	True	6.44	0.5	20181
NC_002973_NC_012488_0.05_400_HS25	Listeria	10	True	5.88	0.67	20181
NC_002973_NC_012488_0.05_400_MSv1	Listeria	6	True	6.36	1.02	20181
NC_002973_NC_012488_0.05_500_HS25	Listeria	4	True	5.91	0.65	20181
NC_002973_NC_012488_0.05_500_MSv1	Listeria	8	True	4.98	1.81	20181
NC_002973_NC_012488_0.05_50_HS25	Listeria	2	False	0	0	20181
NC_002973_NC_012488_0.05_50_MSv1	Listeria	6	True	11.81	7.76	20181
NC_002973_NC_012488_0.1_100_HS25	Listeria	10	True	10.12	3.77	20181
NC_002973_NC_012488_0.1_100_MSv1	Listeria	12	True	12.01	4.34	20181
NC_002973_NC_012488_0.1_200_HS25	Listeria	13	True	8.28	3.39	20181
NC_002973_NC_012488_0.1_200_MSv1	Listeria	13	True	9.26	2.41	20181
NC_002973_NC_012488_0.1_300_HS25	Listeria	15	True	8.84	2.12	20181
NC_002973_NC_012488_0.1_300_MSv1	Listeria	14	True	9.37	2.47	20181
NC_002973_NC_012488_0.1_400_HS25	Listeria	13	True	7.51	1.66	20181
NC_002973_NC_012488_0.1_400_MSv1	Listeria	15	True	8.39	3.84	20181
NC_002973_NC_012488_0.1_500_HS25	Listeria	14	True	8.25	3.86	20181
NC_002973_NC_012488_0.1_500_MSv1	Listeria	15	True	7.57	3.69	20181
NC_002973_NC_012488_0.1_50_HS25	Listeria	9	True	9.59	1.72	20181
NC_002973_NC_012488_0.1_50_MSv1	Listeria	9	True	13.97	5.31	20181
NC_002973_NC_012488_0.2_100_HS25	Listeria	15	True	18.4	5.97	20181
NC_002973_NC_012488_0.2_100_MSv1	Listeria	14	True	20.15	6.47	20181
NC_002973_NC_012488_0.2_200_HS25	Listeria	16	True	15.17	5.44	20181
NC_002973_NC_012488_0.2_200_MSv1	Listeria	16	True	17.81	5.75	20181
NC_002973_NC_012488_0.2_300_HS25	Listeria	15	True	17.35	5.1	20181
NC_002973_NC_012488_0.2_300_MSv1	Listeria	16	True	17.32	5.11	20181
NC_002973_NC_012488_0.2_400_HS25	Listeria	15	True	18.88	3.78	20181
NC_002973_NC_012488_0.2_400_MSv1	Listeria	15	True	17.04	7.92	20181
NC_002973_NC_012488_0.2_500_HS25	Listeria	15	True	17.98	3.39	20181
NC_002973_NC_012488_0.2_500_MSv1	Listeria	15	True	18.64	2.67	20181
NC_002973_NC_012488_0.2_50_HS25	Listeria	14	True	18.78	10.11	20181
NC_002973_NC_012488_0.2_50_MSv1	Listeria	12	True	19.41	6.41	20181
NC_003198_100_HS25_clean	Salmonella	0	False	0	0	20862
NC_003198_100_MSv1_clean	Salmonella	0	False	0	0	20862
NC_003198_200_HS25_clean	Salmonella	0	False	0	0	20862
NC_003198_200_MSv1_clean	Salmonella	1	False	0	0	20862
NC_003198_300_HS25_clean	Salmonella	0	False	0	0	20862
NC_003198_300_MSv1_clean	Salmonella	0	False	0	0	20862
NC_003198_400_HS25_clean	Salmonella	0	False	0	0	20862
NC_003198_400_MSv1_clean	Salmonella	0	False	0	0	20862
NC_003198_500_HS25_clean	Salmonella	0	False	0	0	20862
NC_003198_500_MSv1_clean	Salmonella	0	False	0	0	20862
NC_003198_50_HS25_clean	Salmonella	0	False	0	0	20862
NC_003198_50_MSv1_clean	Salmonella	0	False	0	0	20862
NC_003198_NC_003197_0.05_100_HS25	Salmonella	16	True	8.01	4.19	20862
NC_003198_NC_003197_0.05_100_MSv1	Salmonella	9	True	9.29	2.79	20862
NC_003198_NC_003197_0.05_200_HS25	Salmonella	14	True	6.77	1.07	20862
NC_003198_NC_003197_0.05_200_MSv1	Salmonella	10	True	7.95	1.63	20862
NC_003198_NC_003197_0.05_300_HS25	Salmonella	13	True	6.87	2.17	20862
NC_003198_NC_003197_0.05_300_MSv1	Salmonella	19	True	6.3	1.95	20862
NC_003198_NC_003197_0.05_400_HS25	Salmonella	13	True	7.9	4.2	20862
NC_003198_NC_003197_0.05_400_MSv1	Salmonella	13	True	7.38	2.55	20862
NC_003198_NC_003197_0.05_500_HS25	Salmonella	15	True	7.12	4.25	20862
NC_003198_NC_003197_0.05_500_MSv1	Salmonella	13	True	7.2	2.38	20862
NC_003198_NC_003197_0.05_50_HS25	Salmonella	13	True	11.98	7.08	20862
NC_003198_NC_003197_0.05_50_MSv1	Salmonella	3	True	8.89	2.73	20862
NC_003198_NC_003197_0.1_100_HS25	Salmonella	25	True	10.75	3.96	20862
NC_003198_NC_003197_0.1_100_MSv1	Salmonella	22	True	13.07	6.95	20862
NC_003198_NC_003197_0.1_200_HS25	Salmonella	29	True	11.26	5.88	20862
NC_003198_NC_003197_0.1_200_MSv1	Salmonella	24	True	10.95	3.36	20862
NC_003198_NC_003197_0.1_300_HS25	Salmonella	31	True	10.47	4.8	20862
NC_003198_NC_003197_0.1_300_MSv1	Salmonella	27	True	10.92	4.42	20862
NC_003198_NC_003197_0.1_400_HS25	Salmonella	30	True	11.39	3.83	20862
NC_003198_NC_003197_0.1_400_MSv1	Salmonella	28	True	11.12	4.01	20862
NC_003198_NC_003197_0.1_500_HS25	Salmonella	32	True	10.44	2.97	20862
NC_003198_NC_003197_0.1_500_MSv1	Salmonella	30	True	9.14	3.89	20862
NC_003198_NC_003197_0.1_50_HS25	Salmonella	22	True	13.4	7.61	20862
NC_003198_NC_003197_0.1_50_MSv1	Salmonella	15	True	15.03	4.77	20862
NC_003198_NC_003197_0.2_100_HS25	Salmonella	32	True	18.56	7.2	20862
NC_003198_NC_003197_0.2_100_MSv1	Salmonella	27	True	18.23	6.67	20862
NC_003198_NC_003197_0.2_200_HS25	Salmonella	33	True	20.64	7.68	20862
NC_003198_NC_003197_0.2_200_MSv1	Salmonella	34	True	20.15	7.45	20862
NC_003198_NC_003197_0.2_300_HS25	Salmonella	34	True	18.68	6.35	20862
NC_003198_NC_003197_0.2_300_MSv1	Salmonella	33	True	19.48	10.56	20862
NC_003198_NC_003197_0.2_400_HS25	Salmonella	34	True	18	6.86	20862
NC_003198_NC_003197_0.2_400_MSv1	Salmonella	34	True	20.09	6.73	20862
NC_003198_NC_003197_0.2_500_HS25	Salmonella	33	True	19.35	6.15	20862
NC_003198_NC_003197_0.2_500_MSv1	Salmonella	33	True	20.1	6.08	20862
NC_003198_NC_003197_0.2_50_HS25	Salmonella	31	True	20.1	7.39	20862
NC_003198_NC_003197_0.2_50_MSv1	Salmonella	25	True	20.93	8.12	20862
NC_003198_NC_006511_0.05_100_HS25	Salmonella	9	True	10.45	4.11	20862
NC_003198_NC_006511_0.05_100_MSv1	Salmonella	10	True	10.1	3.91	20862
NC_003198_NC_006511_0.05_200_HS25	Salmonella	9	True	7.52	1.39	20862
NC_003198_NC_006511_0.05_200_MSv1	Salmonella	11	True	6.93	1.02	20862
NC_003198_NC_006511_0.05_300_HS25	Salmonella	8	True	5.66	0.42	20862
NC_003198_NC_006511_0.05_300_MSv1	Salmonella	11	True	6.61	2.1	20862
NC_003198_NC_006511_0.05_400_HS25	Salmonella	9	True	6.8	1.44	20862
NC_003198_NC_006511_0.05_400_MSv1	Salmonella	12	True	5.99	2.04	20862
NC_003198_NC_006511_0.05_500_HS25	Salmonella	13	True	6.98	1.51	20862
NC_003198_NC_006511_0.05_500_MSv1	Salmonella	11	True	6.84	1.29	20862
NC_003198_NC_006511_0.05_50_HS25	Salmonella	3	True	7.71	1.32	20862
NC_003198_NC_006511_0.05_50_MSv1	Salmonella	5	True	11.54	4.33	20862
NC_003198_NC_006511_0.1_100_HS25	Salmonella	20	True	11.08	5.41	20862
NC_003198_NC_006511_0.1_100_MSv1	Salmonella	15	True	12.74	6.44	20862
NC_003198_NC_006511_0.1_200_HS25	Salmonella	21	True	10.75	4.52	20862
NC_003198_NC_006511_0.1_200_MSv1	Salmonella	19	True	11.83	6.15	20862
NC_003198_NC_006511_0.1_300_HS25	Salmonella	21	True	11.07	3.99	20862
NC_003198_NC_006511_0.1_300_MSv1	Salmonella	16	True	8.67	3.21	20862
NC_003198_NC_006511_0.1_400_HS25	Salmonella	21	True	10.86	3.69	20862
NC_003198_NC_006511_0.1_400_MSv1	Salmonella	22	True	10.54	2.34	20862
NC_003198_NC_006511_0.1_500_HS25	Salmonella	23	True	10.91	3.47	20862
NC_003198_NC_006511_0.1_500_MSv1	Salmonella	21	True	11.07	2.49	20862
NC_003198_NC_006511_0.1_50_HS25	Salmonella	12	True	14.98	6.9	20862
NC_003198_NC_006511_0.1_50_MSv1	Salmonella	11	True	16.07	9.5	20862
NC_003198_NC_006511_0.2_100_HS25	Salmonella	21	True	20.01	7.6	20862
NC_003198_NC_006511_0.2_100_MSv1	Salmonella	21	True	21.44	8.18	20862
NC_003198_NC_006511_0.2_200_HS25	Salmonella	25	True	17.39	6.8	20862
NC_003198_NC_006511_0.2_200_MSv1	Salmonella	24	True	18.17	9.69	20862
NC_003198_NC_006511_0.2_300_HS25	Salmonella	24	True	19.37	8.86	20862
NC_003198_NC_006511_0.2_300_MSv1	Salmonella	24	True	18.36	6.96	20862
NC_003198_NC_006511_0.2_400_HS25	Salmonella	24	True	19.51	6.64	20862
NC_003198_NC_006511_0.2_400_MSv1	Salmonella	24	True	19.83	7.52	20862
NC_003198_NC_006511_0.2_500_HS25	Salmonella	24	True	20.36	6.93	20862
NC_003198_NC_006511_0.2_500_MSv1	Salmonella	24	True	18.35	8.58	20862
NC_003198_NC_006511_0.2_50_HS25	Salmonella	19	True	21.24	7.97	20862
NC_003198_NC_006511_0.2_50_MSv1	Salmonella	20	True	17.6	6.3	20862
NC_003198_NC_011094_0.05_100_HS25	Salmonella	22	True	8.78	4.05	20862
NC_003198_NC_011094_0.05_100_MSv1	Salmonella	5	True	7.62	1.61	20862
NC_003198_NC_011094_0.05_200_HS25	Salmonella	13	True	6.71	1.36	20862
NC_003198_NC_011094_0.05_200_MSv1	Salmonella	14	True	8.01	4.19	20862
NC_003198_NC_011094_0.05_300_HS25	Salmonella	11	True	6.73	1.25	20862
NC_003198_NC_011094_0.05_300_MSv1	Salmonella	16	True	7.02	1.97	20862
NC_003198_NC_011094_0.05_400_HS25	Salmonella	19	True	6.24	1.76	20862
NC_003198_NC_011094_0.05_400_MSv1	Salmonella	13	True	6.51	2.06	20862
NC_003198_NC_011094_0.05_500_HS25	Salmonella	17	True	6.43	2.83	20862
NC_003198_NC_011094_0.05_500_MSv1	Salmonella	12	True	7.77	1.78	20862
NC_003198_NC_011094_0.05_50_HS25	Salmonella	11	True	10.59	3.45	20862
NC_003198_NC_011094_0.05_50_MSv1	Salmonella	10	True	10.65	3.44	20862
NC_003198_NC_011094_0.1_100_HS25	Salmonella	29	True	11.93	6.07	20862
NC_003198_NC_011094_0.1_100_MSv1	Salmonella	26	True	9.61	3.12	20862
NC_003198_NC_011094_0.1_200_HS25	Salmonella	33	True	9.91	4.34	20862
NC_003198_NC_011094_0.1_200_MSv1	Salmonella	35	True	11.54	5.8	20862
NC_003198_NC_011094_0.1_300_HS25	Salmonella	32	True	10.27	3.53	20862
NC_003198_NC_011094_0.1_300_MSv1	Salmonella	30	True	10.76	3.81	20862
NC_003198_NC_011094_0.1_400_HS25	Salmonella	32	True	8.87	3.32	20862
NC_003198_NC_011094_0.1_400_MSv1	Salmonella	30	True	8.9	2.74	20862
NC_003198_NC_011094_0.1_500_HS25	Salmonella	36	True	9.94	4.1	20862
NC_003198_NC_011094_0.1_500_MSv1	Salmonella	30	True	10.11	3.87	20862
NC_003198_NC_011094_0.1_50_HS25	Salmonella	14	True	10.61	4.13	20862
NC_003198_NC_011094_0.1_50_MSv1	Salmonella	16	True	15.44	11.31	20862
NC_003198_NC_011094_0.2_100_HS25	Salmonella	34	True	20.22	9.67	20862
NC_003198_NC_011094_0.2_100_MSv1	Salmonella	31	True	18.03	6.72	20862
NC_003198_NC_011094_0.2_200_HS25	Salmonella	33	True	18.97	7.08	20862
NC_003198_NC_011094_0.2_200_MSv1	Salmonella	35	True	17.9	6.31	20862
NC_003198_NC_011094_0.2_300_HS25	Salmonella	36	True	19.26	6.92	20862
NC_003198_NC_011094_0.2_300_MSv1	Salmonella	35	True	17.74	6.22	20862
NC_003198_NC_011094_0.2_400_HS25	Salmonella	36	True	20.88	6.45	20862
NC_003198_NC_011094_0.2_400_MSv1	Salmonella	36	True	19.71	7.26	20862
NC_003198_NC_011094_0.2_500_HS25	Salmonella	36	True	18.79	8.16	20862
NC_003198_NC_011094_0.2_500_MSv1	Salmonella	36	True	18.97	7.53	20862
NC_003198_NC_011094_0.2_50_HS25	Salmonella	28	True	25.84	11.79	20862
NC_003198_NC_011094_0.2_50_MSv1	Salmonella	30	True	22.52	10.4	20862
NC_003210_100_HS25_clean	Listeria	0	False	0	0	20181
NC_003210_100_MSv1_clean	Listeria	0	False	0	0	20181
NC_003210_200_HS25_clean	Listeria	0	False	0	0	20181
NC_003210_200_MSv1_clean	Listeria	0	False	0	0	20181
NC_003210_300_HS25_clean	Listeria	0	False	0	0	20181
NC_003210_300_MSv1_clean	Listeria	0	False	0	0	20181
NC_003210_400_HS25_clean	Listeria	0	False	0	0	20181
NC_003210_400_MSv1_clean	Listeria	0	False	0	0	20181
NC_003210_500_HS25_clean	Listeria	0	False	0	0	20181
NC_003210_500_MSv1_clean	Listeria	0	False	0	0	20181
NC_003210_50_HS25_clean	Listeria	0	False	0	0	20181
NC_003210_50_MSv1_clean	Listeria	0	False	0	0	20181
NC_003210_NC_002973_0.05_100_HS25	Listeria	50	True	7.21	2.29	20181
NC_003210_NC_002973_0.05_100_MSv1	Listeria	38	True	8.5	3.79	20181
NC_003210_NC_002973_0.05_200_HS25	Listeria	38	True	6.76	1.9	20181
NC_003210_NC_002973_0.05_200_MSv1	Listeria	38	True	7.32	2.28	20181
NC_003210_NC_002973_0.05_300_HS25	Listeria	46	True	6.47	1.62	20181
NC_003210_NC_002973_0.05_300_MSv1	Listeria	40	True	6.63	2.57	20181
NC_003210_NC_002973_0.05_400_HS25	Listeria	58	True	6.29	1.84	20181
NC_003210_NC_002973_0.05_400_MSv1	Listeria	28	True	6.17	2.19	20181
NC_003210_NC_002973_0.05_500_HS25	Listeria	50	True	6.32	1.64	20181
NC_003210_NC_002973_0.05_500_MSv1	Listeria	45	True	5.68	1.63	20181
NC_003210_NC_002973_0.05_50_HS25	Listeria	34	True	9.1	3.51	20181
NC_003210_NC_002973_0.05_50_MSv1	Listeria	20	True	13.15	9.26	20181
NC_003210_NC_002973_0.1_100_HS25	Listeria	94	True	9.76	3.98	20181
NC_003210_NC_002973_0.1_100_MSv1	Listeria	95	True	10.1	4.14	20181
NC_003210_NC_002973_0.1_200_HS25	Listeria	114	True	9.1	3.18	20181
NC_003210_NC_002973_0.1_200_MSv1	Listeria	115	True	9.89	3.93	20181
NC_003210_NC_002973_0.1_300_HS25	Listeria	111	True	9.6	3.15	20181
NC_003210_NC_002973_0.1_300_MSv1	Listeria	106	True	9.25	2.85	20181
NC_003210_NC_002973_0.1_400_HS25	Listeria	113	True	9.39	2.96	20181
NC_003210_NC_002973_0.1_400_MSv1	Listeria	110	True	9.08	2.74	20181
NC_003210_NC_002973_0.1_500_HS25	Listeria	115	True	9.09	3.52	20181
NC_003210_NC_002973_0.1_500_MSv1	Listeria	112	True	8.82	3.33	20181
NC_003210_NC_002973_0.1_50_HS25	Listeria	74	True	11	5.09	20181
NC_003210_NC_002973_0.1_50_MSv1	Listeria	79	True	12.82	4.78	20181
NC_003210_NC_002973_0.2_100_HS25	Listeria	130	True	18.07	6.52	20181
NC_003210_NC_002973_0.2_100_MSv1	Listeria	123	True	17.37	7.17	20181
NC_003210_NC_002973_0.2_200_HS25	Listeria	129	True	18.35	6.05	20181
NC_003210_NC_002973_0.2_200_MSv1	Listeria	127	True	18.25	6.03	20181
NC_003210_NC_002973_0.2_300_HS25	Listeria	131	True	17.72	7.01	20181
NC_003210_NC_002973_0.2_300_MSv1	Listeria	124	True	17.04	5.22	20181
NC_003210_NC_002973_0.2_400_HS25	Listeria	131	True	17.6	6.52	20181
NC_003210_NC_002973_0.2_400_MSv1	Listeria	131	True	17.92	5.89	20181
NC_003210_NC_002973_0.2_500_HS25	Listeria	129	True	17.97	6.36	20181
NC_003210_NC_002973_0.2_500_MSv1	Listeria	129	True	16.78	5.99	20181
NC_003210_NC_002973_0.2_50_HS25	Listeria	123	True	21.16	8.19	20181
NC_003210_NC_002973_0.2_50_MSv1	Listeria	102	True	20.27	8.11	20181
NC_003210_NC_017545_0.05_100_HS25	Listeria	16	True	7.64	1.88	20181
NC_003210_NC_017545_0.05_100_MSv1	Listeria	17	True	8.63	3	20181
NC_003210_NC_017545_0.05_200_HS25	Listeria	14	True	7.81	1.85	20181
NC_003210_NC_017545_0.05_200_MSv1	Listeria	18	True	6.55	1.98	20181
NC_003210_NC_017545_0.05_300_HS25	Listeria	14	True	6.71	1.92	20181
NC_003210_NC_017545_0.05_300_MSv1	Listeria	17	True	5.84	1.74	20181
NC_003210_NC_017545_0.05_400_HS25	Listeria	18	True	6.52	1.99	20181
NC_003210_NC_017545_0.05_400_MSv1	Listeria	15	True	5.53	1.42	20181
NC_003210_NC_017545_0.05_500_HS25	Listeria	19	True	5.78	2.3	20181
NC_003210_NC_017545_0.05_500_MSv1	Listeria	12	True	6.1	1.28	20181
NC_003210_NC_017545_0.05_50_HS25	Listeria	12	True	11.43	4.72	20181
NC_003210_NC_017545_0.05_50_MSv1	Listeria	11	True	9.73	6.59	20181
NC_003210_NC_017545_0.1_100_HS25	Listeria	36	True	10.85	3.74	20181
NC_003210_NC_017545_0.1_100_MSv1	Listeria	35	True	11.76	4.07	20181
NC_003210_NC_017545_0.1_200_HS25	Listeria	37	True	9.4	2.99	20181
NC_003210_NC_017545_0.1_200_MSv1	Listeria	39	True	9.92	3.37	20181
NC_003210_NC_017545_0.1_300_HS25	Listeria	37	True	10.44	2.61	20181
NC_003210_NC_017545_0.1_300_MSv1	Listeria	37	True	10.78	2.27	20181
NC_003210_NC_017545_0.1_400_HS25	Listeria	39	True	9.34	3.43	20181
NC_003210_NC_017545_0.1_400_MSv1	Listeria	35	True	8.84	3.71	20181
NC_003210_NC_017545_0.1_500_HS25	Listeria	39	True	9.25	4.44	20181
NC_003210_NC_017545_0.1_500_MSv1	Listeria	36	True	8.84	2.91	20181
NC_003210_NC_017545_0.1_50_HS25	Listeria	23	True	12.53	4.94	20181
NC_003210_NC_017545_0.1_50_MSv1	Listeria	23	True	11.71	6.12	20181
NC_003210_NC_017545_0.2_100_HS25	Listeria	41	True	19.99	7.05	20181
NC_003210_NC_017545_0.2_100_MSv1	Listeria	40	True	17.62	6.25	20181
NC_003210_NC_017545_0.2_200_HS25	Listeria	43	True	18.27	6.66	20181
NC_003210_NC_017545_0.2_200_MSv1	Listeria	41	True	17.86	6.2	20181
NC_003210_NC_017545_0.2_300_HS25	Listeria	43	True	18.34	6.65	20181
NC_003210_NC_017545_0.2_300_MSv1	Listeria	43	True	17.05	6.68	20181
NC_003210_NC_017545_0.2_400_HS25	Listeria	43	True	17.1	7.54	20181
NC_003210_NC_017545_0.2_400_MSv1	Listeria	42	True	18.89	4.53	20181
NC_003210_NC_017545_0.2_500_HS25	Listeria	43	True	18.62	4.28	20181
NC_003210_NC_017545_0.2_500_MSv1	Listeria	40	True	16.76	6.43	20181
NC_003210_NC_017545_0.2_50_HS25	Listeria	39	True	18.45	6.9	20181
NC_003210_NC_017545_0.2_50_MSv1	Listeria	35	True	16.85	6.91	20181
